# Supplementary material for: Keratin5-BMP4 Mechanosignaling Network Regulates Cell Cytoskeletal Reorganization and Chromatin Accessibility during Revascularization-Based Blastema Regeneration
Source: Preprints.org preprint supplement (doi:10.20944/preprints202104.0642.v1), 2021-04-23
Supplement: Supplementary file 2 [file Table S1 Functional comparison of identified genes between blastema tissues and subcellular fractions-induced Pac2 cells .xlsx]

## Sheet: Table S1
Table S1 Functional comparison of identified genes between blastema tissues and subcellular fractions-induced Pac2 cells
GO analyses
		blastema tissue				induced Pac2 cells
		transcription		82 proteins		transcription		Subcellular fractions
GO-ID	Description	GeneRatio	geneID	GeneRatio	geneID	GeneRatio	geneID
Acta2-functional equivalent
GO:0044421	extracellular region part	32/489	adamts15a/aebp1/apoeb/ccl19a.2/ccl25b/ccl34b.4/cpn1/ctss2.2/dcn/fn1a/igfbp1a/igfbp2a/igfbp6a/igfbp6b/inhbab/loxl2b/lpl/lum/mmp2/pcolceb/plaua/postnb/sema3d/serpina10a/serpine1/serpinf1/sostdc1a/tfa/tgfb3/thbs4a/zgc:163025/zgc:171509	5/63	apoeb/dcn/lum/serpina10a/tfa	3/31	hamp/tnfb/wnt5b		F-III
						3/34	c18h3orf33/ccl19a.1/fga		F-II
GO:0005201	extracellular matrix structural constituent	4/505	col11a1b/col1a1a/col1a1b/col1a2	4/73	col11a1b/col1a1a/col1a1b/col1a2	1/150	col9a3		F-III
						2/125	col1a1a/col4a5		F-III
GO:0030198	extracellular matrix organization	9/510	anln/ctss2.2/kirrel3l/loxl2b/lum/myh9a/plod2/postnb/thbs4a	2/67	lum/myh9a	2/117	col4a5/lum
dre04270	Vascular smooth muscle contraction	5/186	gna14/mylk2/ramp2/rhoab/zgc:195023	1/41	mylk2	4/51	adma/adra1aa/prkacba/prkcha		F-III
Flk1-functional equivalent
GO:0001944	vasculature development	29/510	adgrg6/aplnrb/arntl1a/colec12/crb2b/cxcl12b/e2f8/egfl7/flt1/fn1a/gng2/hsp70l/igfbp2a/jak2a/loxl2b/mmp2/myh9a/nrarpa/ntn1a/per2/phkg1a/pld1a/ptprja/rspo1/rspo3/serpinf1/stab2/vcam1b/zap70	1/67	myh9a	1/44	enpp2		FII
						2/33	mep1a.2/wnt5b		F-II
						7/138	angptl4/f3b/fgf1b/kdrl/oxtr/unc5b/vegfd		F-III
						7/117	abca1a/angptl2b/klf2a/mmp2/mtbl/plcd3a/sema3ab		F-III
GO:0072358	cardiovascular system development	29/510	adgrg6/aplnrb/arntl1a/colec12/crb2b/cxcl12b/e2f8/egfl7/flt1/fn1a/gng2/hsp70l/igfbp2a/jak2a/loxl2b/mmp2/myh9a/nrarpa/ntn1a/per2/phkg1a/pld1a/ptprja/rspo1/rspo3/serpinf1/stab2/vcam1b/zap70	1/67	myh9a	2/33	mep1a.2/wnt5b
						1/44	enpp2
GO:0001525	angiogenesis	20/510	adgrg6/aplnrb/crb2b/cxcl12b/e2f8/flt1/fn1a/gng2/igfbp2a/loxl2b/myh9a/nrarpa/ntn1a/per2/phkg1a/pld1a/rspo1/rspo3/serpinf1/zap70	6/117	abca1a/angptl2b/klf2a/mtbl/plcd3a/sema3ab	2/33	mep1a.2/wnt5b		F-II
						1/44	enpp2		F-II
						6/138	angptl4/fgf1b/kdrl/oxtr/unc5b/vegfd		F-III
						6/117	abca1a/angptl2b/klf2a/mtbl/plcd3a/sema3ab		F-III
GO:0002040	sprouting angiogenesis	11/495	adgrg6/aplnrb/cxcl12b/e2f8/flt1/fn1a/gng2/loxl2b/nrarpa/rspo3/zap70			1/117	abca1a		F-III
						1/138	kdrl		F-III
GO:0001570	vasculogenesis	5/510	aplnrb/colec12/cxcl12b/egfl7/flt1	0		0
GO:0030097	hemopoiesis	27/510	abcc5/ago2/alas2/ccl25b/cxcl12b/epoa/f11r.1/fosab/gata1a/gata3/gfi1b/hsp70l/irf8/jak2a/kdm6bb/klf1/klf6a/nfe2/slc25a37/smarca1/smox/snrkb/spi1a/tfr1a/tgfb3/tmem88a/tspo	0	tfr1a	1/33	wnt5b		F-II
						3/117	angptl2b/pim2/socs1a		F-III
						1/44	enpp2		F-II
						5/138	arrb1/casp3b/meox1/runx2b/stat1b		F-III
GO:0060215	primitive hemopoiesis	9/510	gata1a/jak2a/kdm6bb/klf1/nfe2/smarca1/snrkb/tmem88a/tspo	0		1/44	enpp2		F-II
GO:0006778	porphyrin-containing compound metabolic process	7/510	alas1/alas2/blvra/cpox/hmox1a/slc25a39/urod	3/67	blvra/cpox/urod	6/2181	atp5if1b/blvra/fech/hmbsb/isca1/uros		F-I
GO:0042541	hemoglobin biosynthetic process	4/510	alas2/cpox/tfa/tfr1a	3/67	cpox/tfa/tfr1a	3/2181	slc40a1/tfr1a/tfr1b		F-I
Pax3a functional equivalent
GO:0048738	cardiac muscle tissue development	8/510	aplnrb/myh6/mylk2/nexn/nppb/npr3/tmem88a/unc45b	4/67	myh6/mylk2/nexn/unc45b	1/138	unc45b		F-III
GO:0042692	muscle cell differentiation	16/510	cited4b/cryabb/dmrt2b/hsp90aa1.1/kirrel3l/lmod2a/myh6/mylk2/myoz2b/nexn/plod2/sox6/tcap/tmem88a/tmod4/unc45b			1/117	adssl1		F-III
						4/138	meox1/pgm5/tnnt2c/unc45b		F-III
GO:0061061	muscle structure development	20/510	bag3/cited4b/cryabb/dmrt2b/gfra3/hsp90aa1.1/kirrel3l/lamb1a/lmod2a/myh6/mylk2/myoz2b/nexn/plod2/postnb/sox6/tcap/tmem88a/tmod4/unc45b	8/67	bag3/gfra3/lamb1a/myh6/mylk2/myoz2b/nexn/unc45b	1/117	adssl1		F-III
						6/138	gfra3/meox1/pgm5/ptch1/tnnt2c/unc45b		F-III
GO:0014706	striated muscle tissue development	13/510	aplnrb/bag3/cryabb/gfra3/myh6/mylk2/nexn/nppb/npr3/plod2/sox6/tmem88a/unc45b	6/67	bag3/gfra3/myh6/mylk2/nexn/unc45b	1/117	adssl1		F-III
						3/138	gfra3/pgm5/unc45b		F-III
GO:0061026	cardiac muscle tissue regeneration	2/510	fosab/gata3	0		4/2181	cav1/hmmr/larp7/stat3		F-I
Proteolysis-related
GO:0006508	proteolysis	28/495	adamts15a/aebp1/agbl5/capn2l/cfbl/cpn1/ctrb1/ctss2.2/eif4a1a/esco2/lonrf1l/mcl1b/mindy3/mmp2/plaua/prss35/pycard/sdf2/serpine1/tmprss13a/usp2a/xiap/zgc:123295/zgc:163025/zgc:163079/zgc:171509/zgc:55262/zgc:92313	2/67	eif4a1a/pycard	4/138	adamts9/casp3b/metap2a/phex		F-III
						11/117	adamts15a/bcl2l16/btbd11a/cpn1/ctsla/hgfa/htra1b/mmp2/prkn/zgc:158852/znrf2a		F-III
						1/33	mep1a.2		F-II
						1/44	si:dkey-112g5.16		F-II
GO:0051603	proteolysis involved in cellular protein catabolic process	4/495	ctss2.2/lonrf1l/sdf2/usp2a	0		4/117	btbd11a/ctsla/prkn/znrf2a		F-III
H3K9Ac/Me3-related chromatin modification
GO:0006333	chromatin assembly or disassembly	4/495	chaf1a/chaf1b/h1f0/histh1l	2/67	h1f0/histh1l	0
GO:0006325	chromatin organization	10/510	chaf1a/chaf1b/h1f0/histh1l/kdm6bb/loxl2b/prmt1/smarca1/smyd2b/tbl1xr1a	3/67	h1f0/histh1l/prmt1	56/2181	actr6/anp32a/baz1b/bend3/brdt/brms1/brms1la/cenpp/dek/dnmt3bb.2/dpf3/eya3/fbxl6/h1fx/ing1/ing4/ing5a/ing5b/ino80/jarid2b/kdm6bb/kdm7aa/kdm7ab/kmt2a/kmt5b/kmt5c/mbd3b/msl2a/myod1/mysm1/nap1l4b/nat15/noc2l/pcgf1/phf2/phf20b/phf8/pknox1.1/rtf1/setdb1a/si:dkey-148h10.5/si:dkeyp-118b1.2/smarca1/smarca2/smarcad1a/smyd2a/spty2d1/suds3/suz12b/tbl1x/top1l/tspy/ube2al/uhrf1/usp3/zgc:162255		F-I
GO:0016569	covalent chromatin modification	6/495	kdm6bb/loxl2b/prmt1/smarca1/smyd2b/tbl1xr1a	1/67	prmt1	41/2181	baz1b/brdt/brms1/brms1la/dnmt3bb.2/dpf3/eya3/ing1/ing4/ing5a/ing5b/jarid2b/kdm6bb/kdm7aa/kdm7ab/kmt2a/kmt5b/kmt5c/mbd3b/msl2a/myod1/mysm1/nat15/noc2l/pcgf1/phf2/phf20b/phf8/pknox1.1/rtf1/setdb1a/si:dkeyp-118b1.2/smarca1/smyd2a/suds3/suz12b/tbl1x/ube2al/uhrf1/usp3/zgc:162255		F-I
GO:0016573	histone acetylation	0		0		8/2181	ing4/ing5a/ing5b/msl2a/myod1/noc2l/phf20b/pknox1.1		F-I
GO:0016575	histone deacetylation	1/510	tbl1xr1a			5/2181	brms1/brms1la/suds3/tbl1x/zgc:162255		F-I
GO:0016571	histone methylation	1/510	prmt1	1/67	prmt1	7/2181	dnmt3bb.2/jarid2b/kmt2a/kmt5b/kmt5c/pknox1.1/setdb1a		F-I
GO:0016570	histone modification	3/510	kdm6bb/prmt1/tbl1xr1a	1/67	prmt1	32/2181	baz1b/brms1/brms1la/dnmt3bb.2/eya3/ing4/ing5a/ing5b/jarid2b/kdm6bb/kdm7aa/kdm7ab/kmt2a/kmt5b/kmt5c/msl2a/myod1/mysm1/noc2l/pcgf1/phf20b/phf8/pknox1.1/rtf1/setdb1a/si:dkeyp-118b1.2/suds3/tbl1x/ube2al/uhrf1/usp3/zgc:162255		F-I
GO:0032452	histone demethylase activity	1/505	kdm6bb	0		5/2273	kdm6bb/kdm7aa/kdm7ab/phf2/phf8		F-I
GO:0042054	histone methyltransferase activity	2/505	prmt1/smyd2b	1/73	prmt1	9/2273	kmt2a/kmt5ab/kmt5b/kmt5c/ntmt1/prmt2/setdb1a/smyd2a/suz12b		F-I
GO:0046500	S-adenosylmethionine metabolic process	4/510	ahcyl1/ahcyl2/gamt/mat2ab	2/67	ahcyl2/gamt	0
GO:0006338	chromatin remodeling	1/495	smarca1			14/2181	actr6/anp32a/baz1b/cenpp/dek/dpf3/ino80/mysm1/si:dkey-148h10.5/smarca1/smarca2/smarcad1a/spty2d1/top1l		F-I
KEGG signaling pathway analyses
In vivo blastema tissues
ID	Description	GeneRatio	pvalue	Genes
dre00860	Porphyrin and chlorophyll metabolism	7/186	3.17277e-05	alas1/alas2/blvra/cpox/hccsb/hmox1a/urod
dre04933	AGE-RAGE signaling pathway in diabetic complications	11/186	0.0017697	col1a1a/col1a1b/col1a2/cybb/egr1/fn1a/jak2a/mmp2/serpine1/tgfb3/vcam1b
dre04216	Ferroptosis	6/186	0.00228857	cybb/hmox1a/sat1a.2/slc3a2b/tfa/tfr1a
dre00240	Pyrimidine metabolism	7/186	0.00292293	entpd8/nme2b.2/nt5c2a/pnp5a/rrm1/rrm2/tyms
dre00140	Steroid hormone biosynthesis	5/186	0.00562899	comtb/cyp1b1/hsd11b2/hsd17b2/hsd17b7
dre04141	Protein processing in endoplasmic reticulum	12/186	0.00851119	bag2/calr3b/dnaja1/dnajb1b/hsp70.3/hsp70l/hsp90aa1.1/hsp90aa1.2/hsp90b1/pdia4/sec61a1l/zgc:55262
dre04217	Necroptosis	12/186	0.00851119	camk2d2/cybb/glulb/hmgb1a/hsp90aa1.1/hsp90aa1.2/jak2a/pycard/pygl/slc25a4/xiap/zgc:55262
dre00260	Glycine, serine and threonine metabolism	5/186	0.011538	alas1/alas2/bpgm/gamt/tdh
dre00910	Nitrogen metabolism	3/186	0.0190587	ca5a/cahz/glulb
dre04145	Phagosome	10/186	0.0200929	calr3b/colec12/ctss2.2/cyba/cybb/mhc2b/sec61a1l/tfr1a/thbs4a/tubb1
dre00630	Glyoxylate and dicarboxylate metabolism	4/186	0.0255425	acss2l/cat/glulb/pgp
dre04672	Intestinal immune network for IgA production	4/186	0.0303521	ccl25b/ccr9a/cxcl12b/mhc2b
dre04510	Focal adhesion	13/186	0.0348686	cav2/col1a1a/col1a1b/col1a2/flt1/fn1a/lamb1a/mylk2/mylpfa/parvg/rhoab/thbs4a/xiap
dre00330	Arginine and proline metabolism	5/186	0.0380721	amd1/arg2/gamt/sat1a.2/smox
dre00983	Drug metabolism - other enzymes	5/186	0.0507003	gstm.3/hprt1/nme2b.2/rrm1/rrm2
dre04512	ECM-receptor interaction	6/186	0.0544651	col1a1a/col1a1b/col1a2/fn1a/lamb1a/thbs4a
dre00590	Arachidonic acid metabolism	4/186	0.0546178	ptgdsb.1/ptgdsb.2/ptges3a/ptgs2b
dre04621	NOD-like receptor signaling pathway	9/186	0.0617863	cyba/cybb/hsp90aa1.1/hsp90aa1.2/pycard/rhoab/tp53bp1/txn/xiap
dre00533	Glycosaminoglycan biosynthesis - keratan sulfate	2/186	0.0753818	b3gnt2b/chst1
dre00270	Cysteine and methionine metabolism	4/186	0.0780515	ahcyl1/ahcyl2/amd1/mat2ab
dre04371	Apelin signaling pathway	9/186	0.0974349	aplnrb/cdh1/egr1/gna14/gnb5b/gng2/klf2b/mylk2/serpine1
dre00230	Purine metabolism	8/186	0.0992792	entpd2a.1/entpd8/hprt1/nme2b.2/nt5c2a/pnp5a/rrm1/rrm2
dre03410	Base excision repair	3/186	0.102854	fen1/hmgb1a/pcna
dre03030	DNA replication	3/186	0.109279	fen1/mcm7/pcna
dre00760	Nicotinate and nicotinamide metabolism	3/186	0.122579	mibp/nt5c2a/pnp5a
dre04261	Adrenergic signaling in cardiomyocytes	10/186	0.133531	actc1b/adrb1/adrb2b/adrb3a/atp1a1a.2/atp1b1b/atp1b2a/camk2d2/gna14/tpm1
dre04060	Cytokine-cytokine receptor interaction	9/186	0.142916	ccl25b/ccr9a/cxcl12b/cxcr3.1/epoa/il21r.1/il6r/inhbab/tgfb3
dre00051	Fructose and mannose metabolism	3/186	0.143558	pfkfb3/pfkfb4a/pfklb
dre04350	TGF-beta signaling pathway	6/186	0.161259	dcn/id2b/inhbab/rhoab/tfdp1a/tgfb3
dre00220	Arginine biosynthesis	2/186	0.17725	arg2/glulb
dre04068	FoxO signaling pathway	7/186	0.250364	cat/foxo3a/klf2b/prmt1/sgk2a/sgk2b/tgfb3
dre04514	Cell adhesion molecules (CAMs)	6/186	0.257623	cdh1/cldn1/cldnb/f11r.1/mhc2b/vcam1b
dre00480	Glutathione metabolism	3/186	0.269881	gstm.3/rrm1/rrm2
dre01230	Biosynthesis of amino acids	4/186	0.282928	arg2/glulb/mat2ab/pfklb
dre04260	Cardiac muscle contraction	5/186	0.287931	actc1b/atp1a1a.2/atp1b1b/atp1b2a/tpm1
In vitro induced Pac2 cells
ID	Description	GeneRatio	pvalue	Genes	induced regulation (6dpa vs 0dpa)
dre04933	AGE-RAGE signaling pathway in diabetic complications	5/41	0.00156526	col1a1a/col4a5/mmp2/pim2/plcd3a	Down-regulation by Fraction III
dre00511	Other glycan degradation	2/41	0.0111631	fuca1.1/zgc:153169	Down-regulation by Fraction III
dre00030	Pentose phosphate pathway	2/41	0.0205554	aldoab/pgm1	Down-regulation by Fraction III
dre04068	FoxO signaling pathway	4/41	0.0252959	fbxo25/insb/klf2a/zgc:73226	Down-regulation by Fraction III
dre02010	ABC transporters	2/41	0.028125	abca1a/cftr	Down-regulation by Fraction III
dre04140	Autophagy - animal	4/41	0.0288668	ctsla/ddit4/insb/zgc:73226	Down-regulation by Fraction III
dre04260	Cardiac muscle contraction	3/41	0.043675	cacng2a/cox4i2/cox6a2	Down-regulation by Fraction III
dre04933	AGE-RAGE signaling pathway in diabetic complications	6/51	0.000643724	casp3b/cdc42l2/f3a/f3b/stat1b/vegfd	Up-regulation by Fraction III
dre04010	MAPK signaling pathway	9/51	0.00342479	arrb1/casp3b/cdc42l2/fgf1b/kdrl/kitb/kitlgb/prkacba/vegfd	Up-regulation by Fraction III
dre04340	Hedgehog signaling pathway	3/51	0.0142468	arrb1/prkacba/ptch1	Up-regulation by Fraction III
dre00140	Steroid hormone biosynthesis	2/51	0.0400734	cyp1b1/dhrs11a	Up-regulation by Fraction III
dre00830	Retinol metabolism	2/51	0.0439956	cyp27c1/zgc:154169	Up-regulation by Fraction III
dre04270	Vascular smooth muscle contraction	4/51	0.0444475	adma/adra1aa/prkacba/prkcha	Up-regulation by Fraction III
dre04310	Wnt signaling pathway	3/14	0.00837009	camk2a/rac3a/wnt5b	Down-regulation by Fraction II
dre00561	Glycerolipid metabolism	3/14	0.00972193	glyctk/mboat1	Down-regulation by Fraction II
dre00430	Taurine and hypotaurine metabolism	1/14	0.0318129	adob	Down-regulation by Fraction II
dre04916	Melanogenesis	2/14	0.0395005	camk2a/wnt5b	Down-regulation by Fraction II
dre04114	Oocyte meiosis	2/14	0.0431967	camk2a/cpeb3	Down-regulation by Fraction II
dre00040	Pentose and glucuronate interconversions	1/14	0.0495671	ugp2a	Down-regulation by Fraction II
dre00531	Glycosaminoglycan degradation	1/14	0.0495671	hyal3	Down-regulation by Fraction II
dre04260	Cardiac muscle contraction	2/8	0.00954249	atp1a1a.2/cacng2a	Up-regulation by Fraction II
dre04261	Adrenergic signaling in cardiomyocytes	2/8	0.0313725	atp1a1a.2/cacng2a	Up-regulation by Fraction II
					Up-regulation by Fraction II
					Up-regulation by Fraction II
