# Supplementary material for: Keratin5-BMP4 Mechanosignaling Network Regulates Cell Cytoskeletal Reorganization and Chromatin Accessibility during Revascularization-Based Blastema Regeneration
Source: Preprints.org preprint supplement (doi:10.20944/preprints202104.0642.v1), 2021-04-23
Supplement: Supplementary file 3 [file Table S2 H3K9Ac and H3K9Me3 reciprocal depositions at chromatin.xlsx]

## Sheet: Table S2
Table S2 H3K9Ac and H3K9Me3 reciprocal depositions at chromatin
H3K9ac_0dpa	H3K9ac_6dpa	H3K9ac_9dpa	H3K9me3_0dpa	H3K9me3_6dpa	H3K9me3_9dpa	number of overlapped ChIP-seq peaks)	Samples
X						7674	H3K9ac_0d
X					X	480	H3K9ac_0d|H3K9me3_9d
X				X		596	H3K9ac_0d|H3K9me3_6d
X				X	X	118	H3K9ac_0d|H3K9me3_6d|H3K9me3_9d
X			X			818	H3K9ac_0d|H3K9me3_0d
X			X		X	161	H3K9ac_0d|H3K9me3_0d|H3K9me3_9d
X			X	X		231	H3K9ac_0d|H3K9me3_0d|H3K9me3_6d
X			X	X	X	168	H3K9ac_0d|H3K9me3_0d|H3K9me3_6d|H3K9me3_9d
					X	9082	H3K9me3_9d
				X		10486	H3K9me3_6d
				X	X	959	H3K9me3_6d|H3K9me3_9d
			X			17411	H3K9me3_0d
			X		X	1488	H3K9me3_0d|H3K9me3_9d
			X	X		2137	H3K9me3_0d|H3K9me3_6d
			X	X	X	687	H3K9me3_0d|H3K9me3_6d|H3K9me3_9d
X	X	X				8043	H3K9ac_0d|H3K9ac_6d|H3K9ac_9d
X	X	X			X	555	H3K9ac_0d|H3K9ac_6d|H3K9ac_9d|H3K9me3_9d
X	X	X		X		1496	H3K9ac_0d|H3K9ac_6d|H3K9ac_9d|H3K9me3_6d
X	X	X		X	X	252	H3K9ac_0d|H3K9ac_6d|H3K9ac_9d|H3K9me3_6d|H3K9me3_9d
X	X	X	X			1345	H3K9ac_0d|H3K9ac_6d|H3K9ac_9d|H3K9me3_0d
X	X	X	X		X	217	H3K9ac_0d|H3K9ac_6d|H3K9ac_9d|H3K9me3_0d|H3K9me3_9d
X	X	X	X	X		501	H3K9ac_0d|H3K9ac_6d|H3K9ac_9d|H3K9me3_0d|H3K9me3_6d
X	X	X	X	X	X	1286	H3K9ac_0d|H3K9ac_6d|H3K9ac_9d|H3K9me3_0d|H3K9me3_6d|H3K9me3_9d
	X	X				1977	H3K9ac_6d|H3K9ac_9d
	X	X			X	178	H3K9ac_6d|H3K9ac_9d|H3K9me3_9d
	X	X		X		272	H3K9ac_6d|H3K9ac_9d|H3K9me3_6d
	X	X		X	X	93	H3K9ac_6d|H3K9ac_9d|H3K9me3_6d|H3K9me3_9d
	X	X	X			314	H3K9ac_6d|H3K9ac_9d|H3K9me3_0d
	X	X	X		X	121	H3K9ac_6d|H3K9ac_9d|H3K9me3_0d|H3K9me3_9d
	X	X	X	X		167	H3K9ac_6d|H3K9ac_9d|H3K9me3_0d|H3K9me3_6d
	X	X	X	X	X	262	H3K9ac_6d|H3K9ac_9d|H3K9me3_0d|H3K9me3_6d|H3K9me3_9d
X	X					1284	H3K9ac_0d|H3K9ac_6d
X	X				X	108	H3K9ac_0d|H3K9ac_6d|H3K9me3_9d
X	X			X		176	H3K9ac_0d|H3K9ac_6d|H3K9me3_6d
X	X			X	X	71	H3K9ac_0d|H3K9ac_6d|H3K9me3_6d|H3K9me3_9d
X	X		X			230	H3K9ac_0d|H3K9ac_6d|H3K9me3_0d
X	X		X		X	107	H3K9ac_0d|H3K9ac_6d|H3K9me3_0d|H3K9me3_9d
X	X		X	X		138	H3K9ac_0d|H3K9ac_6d|H3K9me3_0d|H3K9me3_6d
X	X		X	X	X	210	H3K9ac_0d|H3K9ac_6d|H3K9me3_0d|H3K9me3_6d|H3K9me3_9d
	X					11109	H3K9ac_6d
	X				X	624	H3K9ac_6d|H3K9me3_9d
	X			X		837	H3K9ac_6d|H3K9me3_6d
	X			X	X	203	H3K9ac_6d|H3K9me3_6d|H3K9me3_9d
	X		X			1282	H3K9ac_6d|H3K9me3_0d
	X		X		X	265	H3K9ac_6d|H3K9me3_0d|H3K9me3_9d
	X		X	X		381	H3K9ac_6d|H3K9me3_0d|H3K9me3_6d
	X		X	X	X	309	H3K9ac_6d|H3K9me3_0d|H3K9me3_6d|H3K9me3_9d
X		X				934	H3K9ac_0d|H3K9ac_9d
X		X			X	136	H3K9ac_0d|H3K9ac_9d|H3K9me3_9d
X		X		X		121	H3K9ac_0d|H3K9ac_9d|H3K9me3_6d
X		X		X	X	74	H3K9ac_0d|H3K9ac_9d|H3K9me3_6d|H3K9me3_9d
X		X	X			143	H3K9ac_0d|H3K9ac_9d|H3K9me3_0d
X		X	X		X	59	H3K9ac_0d|H3K9ac_9d|H3K9me3_0d|H3K9me3_9d
X		X	X	X		95	H3K9ac_0d|H3K9ac_9d|H3K9me3_0d|H3K9me3_6d
X		X	X	X	X	129	H3K9ac_0d|H3K9ac_9d|H3K9me3_0d|H3K9me3_6d|H3K9me3_9d
		X				8535	H3K9ac_9d
		X			X	513	H3K9ac_9d|H3K9me3_9d
		X		X		623	H3K9ac_9d|H3K9me3_6d
		X		X	X	159	H3K9ac_9d|H3K9me3_6d|H3K9me3_9d
		X	X			955	H3K9ac_9d|H3K9me3_0d
		X	X		X	200	H3K9ac_9d|H3K9me3_0d|H3K9me3_9d
		X	X	X		268	H3K9ac_9d|H3K9me3_0d|H3K9me3_6d
		X	X	X	X	181	H3K9ac_9d|H3K9me3_0d|H3K9me3_6d|H3K9me3_9d
