# Supplementary material for: Keratin5-BMP4 Mechanosignaling Network Regulates Cell Cytoskeletal Reorganization and Chromatin Accessibility during Revascularization-Based Blastema Regeneration
Source: Preprints.org preprint supplement (doi:10.20944/preprints202104.0642.v1), 2021-04-23
Supplement: Supplementary file 4 [file Table S3 H3K9Ac and H3K9Me3 enrichemnets and the nearest genes' transcription.xlsx]

## Sheet: Table S3
Table S3 H3K9Ac and H3K9Me3 enrichemnets and the nearest genes' transcription
The most enriched genes
gene	distance2TSS	Enrichment peak score (RPKM)						Transcript level （FPKM)				Top rank H3K9Ac-marked genes				Top rank H3K9Me3-marked genes
		H3K9Ac_0dpa	H3K9Ac_6dpa	H3K9Ac_9dpa	H3K9Me3_0dpa	H3K9Me3_6dpa	H3K9Me3_9dpa	0dpa	6dpa	9dpa		0dpa	6dpa	9dpa		0dpa	6dpa	9dpa
zgc:113516	-36558	1687	2453.47	1598.12	3405.92	2926.78	2535.51	2.22793	0.433208	0.479088		zgc:113516	zgc:113516	zgc:113516		zgc:113516	zgc:113516	zgc:113516
mep1b	-42201	1429.08	1699.59	1420.6	2025.44	2318.69	2062.09	0.21363	0	0.0376803		mep1b	mep1b	mep1b		mep1b	mep1b	mep1b
srsf10b	-19154	938.204	1276.34	844.001	1844.07	1481.4	1371.14	12.8733	14.3596	13.0368		srsf10b	srsf10b	srsf10b		srsf10b	srsf10b	srsf10b
mir461	97809	721.744	872.604	773.759	1168.77	1308.04	1227.96	0	0	0		mir461	mir461	mir461		mir461	mir461	mir461
ndufc2	98453	499.282	593.7	423.417	738.91	777.957	686.622	376.562	305.725	428.872		ndufc2	ndufc2	ndufc2		ndufc2	ndufc2	ndufc2
ipcef1	-68033	405.312	457.211	397.847	924.282	786.477	674.636	4.62745	1.55431	2.08473		ipcef1	ipcef1	ipcef1		ipcef1	stoml2	ipcef1
stoml2	82285	392.223	454.984	373.136	889.224	767.163	614.815	15.2074	11.2694	15.0696		stoml2	stoml2	stoml2		stoml2	ipcef1	stoml2
LOC557301	-49272	330.992	386.983	309.423	801.639	628.503	533.97	0.186143	0.173773	0.196996		LOC557301	LOC557301	LOC557301		LOC557301	LOC557301	LOC557301
sox9b	59355	230.229	332.281	231.345	502.375	352.834	365.021	0.273344	1.09309	0.133833		fmr1	sox9b	fmr1		fmr1	sox9b	fmr1
zgc:109809	-10723	215.744	312.612	226.777	498.052	471.358	344.603	4.83191	5.62588	7.76691		prss59.1	zgc:109809	prss59.1		prss59.1	zgc:109809	irge4
mark3a	-68737	254.853	299.042	252.542	548.341	491.625	486.348	20.0492	16.6636	16.1138		irge4	mark3a	irge4		irge4	mark3a	prss59.1
prss59.1	-71600	282.944	295.748	271.344	690.023	571.323	480.673	0	0	0		lars2	prss59.1	rab11bb		lars2	prss59.1	mark3a
irge4	-91750	266.205	285.107	267.046	620.688	591.811	446.154	1.36744	4.29181	1.45578		mark3a	irge4	mark3a		mark3a	irge4	lars2
lars2	98660	264.933	283.64	251.484	331.359	385.585	347.32	3.12103	3.9725	3.06611		rab11bb	lars2	lars2		zgc:63694	lars2	slx1b
fmr1	-49377	290.33	280.402	276.9	677.116	551.028	471.744	9.41459	12.2317	11.5637		zgc:63694	fmr1	slx1b		sox9b	fmr1	zgc:63694
slx1b	-11113	225.563	261.306	234.538	404.22	438.135	419.418	3.20148	4.45308	3.72834		sox9b	slx1b	sox9b		slx1b	slx1b	sox9b
capn3a	43157	222.077	252.521	207.158	592.4	500.823	415.48	0.095351	0.0931758	0.0764008		slx1b	capn3a	zgc:63694		capn3a	capn3a	zgc:109809
mafga	52453	170.973	250.651	173.185	380.367	406.329	315.775	0	0	0		capn3a	mafga	zgc:109809		c1r	zgc:63694	il6r
zgc:63694	53015	233.09	244.549	226.883	552.936	463.6	433.471	1.95869	4.17003	4.0941		zgc:109809	zgc:63694	il6r		zgc:109809	c1r	capn3a
c1r	5767	215.437	237.424	167.456	278.839	281.372	211.807	0	0	0		c1r	c1r	capn3a		il6r	il6r	pimr141
il6r	91544	183.865	221.351	213.733	308.457	354.682	323.662	7.0395	7.01894	2.37535		pimr141	il6r	pimr141		pimr141	penkb	traip
penkb	-37402	176.112	219.429	171.923	333.333	341.395	301.851	0.191743	0.139912	0		il6r	penkb	mafga		traip	pimr141	penkb
pimr141	-14929	185.473	217.948	191.762	440.104	393.199	313.19	0.389737	0	0		penkb	pimr141	penkb		penkb	traip	mafga
rab11bb	19288	243.596	215.283	261.213	393.827	346.475	318.194	9.83379	13.302	9.82527		hpdb	rab11bb	hpdb		mafga	mafga	c1r
traip	29257	170.865	198.596	165.805	254.869	261.165	250.153	1.17044	1.42639	1.12084		mafga	traip	c1r		or129-1	hpdb	hpdb
hpdb	80975	172.028	194.478	171.166	410.279	358.355	294.409	2.83542	5.97809	0.662282		traip	hpdb	traip		ptk2bb	or129-1	or129-1
or129-1	13888	163.037	189.314	153.56	424.055	357.86	282.468	0	0	0		or129-1	or129-1	rpn2		hpdb	zgc:91999	ptk2bb
rpn2	94848	156.312	184.267	157.567	272.898	301.194	289.96	51.28	49.3812	44.1818		rpn2	rpn2	or129-1		zgc:103755	cpne5b	rpn2
zgc:91999	-3736	148.381	173.998	127.111	355.123	261.699	235.987	0	0.099557	0		ptk2bb	zgc:91999	ptk2bb		zgc:91999	rpn2	cpne5b
zgc:103755	-24728	143.927	157.066	128.186	332.841	306.188	238.682	1.83924	2.18511	1.88045		zgc:91999	zgc:103755	zgc:103755		rpn2	zgc:103755	zgc:103755
key blastema effectors
Gene Name	Start	End	Annotation	Detailed Annotation		H3K9Ac-enriched peak score (RPKM)			H3K9Me3-enriched peak score(RPKM)			Transcript level(FPKM)
						0dpa	6dpa	9dpa	0dpa	6dpa	9dpa	0dpa	6dpa	9dpa
krt15	11534622	11534773	exon (NM_213523, exon 1 of 7)	exon (NM_213523, exon 1 of 7)		0	66	61	0	0	0	457.811	968.11	1094.99
krt18	10412942	10413575	exon (NM_178437, exon 1 of 7)	exon (NM_178437, exon 1 of 7)		213	330	278	0	0	0	275.061	223.119	284.625
krt4	39326389	39326534	Intergenic	Intergenic		0	112	107	0	0	0	180.792	338.372	322.136
krt5	10234839	10235158	Intergenic	hAT-N53_DR|DNA|hAT-Ac?		24	0	49	0	0	0	2.51472	99.4094	9.64857
krt8	10329988	10330246	Intergenic	DNA-1-4_DR|DNA|DNA		336	423	432	21	51	0	1185.76	1566.15	1580.46
krt91	5464040	5464282	promoter-TSS (NM_001003445)	promoter-TSS (NM_001003445)		24	49	0	0	0	0	119	293.935	161.842
krt93	11448231	11448376	Intergenic	Intergenic		132	178	206	0	72	0	0.192935	0.477191	0.459998
krt94	11487578	11487787	exon (NM_001077454, exon 1 of 8)	exon (NM_001077454, exon 1 of 8)		49	165	120	0	0	0	1073.92	1494.37	1617.51
krt95	12265316	12265554	Intergenic	DNA-2-12_DR|DNA|CMC-EnSpm		166	198	136	49	27	108	0	0.161093	0
krt96	11770580	11770927	intron (NM_001044313, intron 14 of 25)	intron (NM_001044313, intron 14 of 25)		0	34	36	0	0	0	0.198041	1.69369	0.0574549
krt97												0.694629	15.5774	1.76377
col11a1a	28769055	28769335	intron (NM_001083844, intron 7 of 65)	(AGAT)n|Simple_repeat|Simple_repeat		30	0	0	0	0	0	0.0995263	1.16478	1.23669
col11a1b	15852334	15852489	intron (NM_001184954, intron 4 of 66)	HATN9_DR|DNA|DNA		0	0	0	0	18	0	0.794506	10.6249	10.4939
col1a1a	23184711	23184867	Intergenic	Intergenic		229	384	361	0	0	0	83.8173	364.174	298.798
col1a1b	3117741	3118105	Intergenic	Intergenic		99	156	164	0	0	0	105.604	368.647	318.317
col1a2	41396282	41396652	intron (NM_182968, intron 1 of 48)	intron (NM_182968, intron 1 of 48)		263	318	324	0	0	0	92.4016	393.453	329.112
col2a1b	108030	108222	intron (NM_001281478, intron 3 of 48)	(AC)n|Simple_repeat|Simple_repeat		0	0	0	106	0	0	1.85348	2.80784	1.85015
kdr	22337703	22338078	intron (NM_001024653, intron 6 of 31)	intron (NM_001024653, intron 6 of 31)		237	120	68	0	0	0	25.0787	13.3652	13.6968
kdrl	32754993	32755497	Intergenic	Intergenic		221	164	221	0	0	0	54.7602	36.2438	41.8192
acta2	16981415	16981560	intron (NM_212620, intron 2 of 8)	TDR18|DNA|TcMar		94	0	40	37	0	0	729.175	548.988	641.14
pax3a	47576539	47576696	exon (NM_131277, exon 3 of 8)	exon (NM_131277, exon 3 of 8)		232	233	330	1927	1155	1996	0	0	0
pax3b	42064236	42064733	Intergenic	DNA-8-26_DR|DNA|hAT-Tip100		54	57	129	29	51	0	0	0	0.0529307
