# Supplementary material for: Keratin5-BMP4 Mechanosignaling Network Regulates Cell Cytoskeletal Reorganization and Chromatin Accessibility during Revascularization-Based Blastema Regeneration
Source: Preprints.org preprint supplement (doi:10.20944/preprints202104.0642.v1), 2021-04-23
Supplement: Supplementary file 5 [file Table S4 Corresponding motifs at the predicted H3K9Ac-:H3K9Me3-specific enhancers .xlsx]

## Sheet: Table S4
Table S4 Corresponding motifs at the predicted H3K9Ac-/H3K9Me3-specific enhancers
Stable motifs
H3K9Ac-integrgeinc motifs
0dpa				6dpa				9dpa
Motif Name	P-value	# of Target Sequences with Motif(of 4099)	% of Target Sequences with Motif	Motif Name	P-value	# of Target Sequences with Motif(of 3675)	% of Target Sequences with Motif	Motif Name	P-value	# of Target Sequences with Motif(of 3901)	% of Target Sequences with Motif
p73(p53)/Trachea-p73-ChIP-Seq(PRJNA310161)/Homer	1e-171	216	0.0527	p73(p53)/Trachea-p73-ChIP-Seq(PRJNA310161)/Homer	1e-164	197	0.0536	p73(p53)/Trachea-p73-ChIP-Seq(PRJNA310161)/Homer	1e-161	204	0.0523
p53(p53)/Saos-p53-ChIP-Seq(GSE15780)/Homer	1e-106	242	0.0591	p53(p53)/Saos-p53-ChIP-Seq(GSE15780)/Homer	1e-106	213	0.0579	p53(p53)/Saos-p53-ChIP-Seq(GSE15780)/Homer	1e-105	230	0.059
p53(p53)/Saos-p53-ChIP-Seq/Homer	1e-106	242	0.0591	p53(p53)/Saos-p53-ChIP-Seq/Homer	1e-106	213	0.0579	p53(p53)/Saos-p53-ChIP-Seq/Homer	1e-105	230	0.059
Tcfcp2l1(CP2)/mES-Tcfcp2l1-ChIP-Seq(GSE11431)/Homer	1e-90	221	0.054	Tcfcp2l1(CP2)/mES-Tcfcp2l1-ChIP-Seq(GSE11431)/Homer	1e-96	226	0.0615	Tcfcp2l1(CP2)/mES-Tcfcp2l1-ChIP-Seq(GSE11431)/Homer	1e-92	219	0.0562
PRDM1(Zf)/Hela-PRDM1-ChIP-Seq(GSE31477)/Homer	1e-58	439	0.1072	PRDM1(Zf)/Hela-PRDM1-ChIP-Seq(GSE31477)/Homer	1e-52	392	0.1066	PRDM1(Zf)/Hela-PRDM1-ChIP-Seq(GSE31477)/Homer	1e-56	416	0.1067
EAR2(NR)/K562-NR2F6-ChIP-Seq(Encode)/Homer	1e-53	658	0.1607	AP-2alpha(AP2)/Hela-AP2alpha-ChIP-Seq(GSE31477)/Homer	1e-44	222	0.0604	FXR(NR),IR1/Liver-FXR-ChIP-Seq(Chong_et_al.)/Homer	1e-54	247	0.0633
COUP-TFII(NR)/K562-NR2F1-ChIP-Seq(Encode)/Homer	1e-48	675	0.1648	EBF1(EBF)/Near-E2A-ChIP-Seq(GSE21512)/Homer	1e-42	238	0.0647	AP-2alpha(AP2)/Hela-AP2alpha-ChIP-Seq(GSE31477)/Homer	1e-51	238	0.061
EBF1(EBF)/Near-E2A-ChIP-Seq(GSE21512)/Homer	1e-43	263	0.0642	FXR(NR),IR1/Liver-FXR-ChIP-Seq(Chong_et_al.)/Homer	1e-42	222	0.0604	p63(p53)/Keratinocyte-p63-ChIP-Seq(GSE17611)/Homer	1e-46	273	0.07
AP-2alpha(AP2)/Hela-AP2alpha-ChIP-Seq(GSE31477)/Homer	1e-42	242	0.0591	EAR2(NR)/K562-NR2F6-ChIP-Seq(Encode)/Homer	1e-41	570	0.155	AP-2gamma(AP2)/MCF7-TFAP2C-ChIP-Seq(GSE21234)/Homer	1e-44	261	0.0669
p63(p53)/Keratinocyte-p63-ChIP-Seq(GSE17611)/Homer	1e-42	284	0.0694	COUP-TFII(NR)/K562-NR2F1-ChIP-Seq(Encode)/Homer	1e-40	601	0.1634	EAR2(NR)/K562-NR2F6-ChIP-Seq(Encode)/Homer	1e-43	597	0.1531
FXR(NR),IR1/Liver-FXR-ChIP-Seq(Chong_et_al.)/Homer	1e-40	233	0.0569	p63(p53)/Keratinocyte-p63-ChIP-Seq(GSE17611)/Homer	1e-40	253	0.0688	EBF1(EBF)/Near-E2A-ChIP-Seq(GSE21512)/Homer	1e-43	252	0.0646
HNF4a(NR),DR1/HepG2-HNF4a-ChIP-Seq(GSE25021)/Homer	1e-38	252	0.0615	AP-2gamma(AP2)/MCF7-TFAP2C-ChIP-Seq(GSE21234)/Homer	1e-34	229	0.0623	COUP-TFII(NR)/K562-NR2F1-ChIP-Seq(Encode)/Homer	1e-41	629	0.1613
Erra(NR)/HepG2-Erra-ChIP-Seq(GSE31477)/Homer	1e-37	772	0.1885	HNF4a(NR),DR1/HepG2-HNF4a-ChIP-Seq(GSE25021)/Homer	1e-34	232	0.0631	HNF4a(NR),DR1/HepG2-HNF4a-ChIP-Seq(GSE25021)/Homer	1e-31	228	0.0585
THRa(NR)/C17.2-THRa-ChIP-Seq(GSE38347)/Homer	1e-35	194	0.0474	Gata6(Zf)/HUG1N-GATA6-ChIP-Seq(GSE51936)/Homer	1e-33	586	0.1594	Erra(NR)/HepG2-Erra-ChIP-Seq(GSE31477)/Homer	1e-29	705	0.1808
AP-2gamma(AP2)/MCF7-TFAP2C-ChIP-Seq(GSE21234)/Homer	1e-34	256	0.0625	Erra(NR)/HepG2-Erra-ChIP-Seq(GSE31477)/Homer	1e-28	676	0.1838	THRa(NR)/C17.2-THRa-ChIP-Seq(GSE38347)/Homer	1e-28	165	0.0423
H3K9Me3-intergenic motifs
0dpa				6dpa				9dpa
Motif Name	P-value	# of Target Sequences with Motif(of 7194)	% of Target Sequences with Motif	Motif Name	P-value	# of Target Sequences with Motif(of 7132)	% of Target Sequences with Motif	Motif Name	P-value	# of Target Sequences with Motif(of 7354)	% of Target Sequences with Motif
p73(p53)/Trachea-p73-ChIP-Seq(PRJNA310161)/Homer	1e-287	364	0.0506	p73(p53)/Trachea-p73-ChIP-Seq(PRJNA310161)/Homer	1e-263	368	0.0516	p73(p53)/Trachea-p73-ChIP-Seq(PRJNA310161)/Homer	1e-241	364	0.0495
p53(p53)/Saos-p53-ChIP-Seq(GSE15780)/Homer	1e-209	423	0.0588	p53(p53)/Saos-p53-ChIP-Seq(GSE15780)/Homer	1e-211	463	0.0649	p53(p53)/Saos-p53-ChIP-Seq(GSE15780)/Homer	1e-191	456	0.062
p53(p53)/Saos-p53-ChIP-Seq/Homer	1e-209	423	0.0588	p53(p53)/Saos-p53-ChIP-Seq/Homer	1e-211	463	0.0649	p53(p53)/Saos-p53-ChIP-Seq/Homer	1e-191	456	0.062
Tcfcp2l1(CP2)/mES-Tcfcp2l1-ChIP-Seq(GSE11431)/Homer	1e-202	474	0.0659	Tcfcp2l1(CP2)/mES-Tcfcp2l1-ChIP-Seq(GSE11431)/Homer	1e-157	433	0.0607	Tcfcp2l1(CP2)/mES-Tcfcp2l1-ChIP-Seq(GSE11431)/Homer	1e-167	447	0.0608
CTCF(Zf)/CD4+CTCF-ChIP-Seq(Barski_et_al.)/Homer	1e-109	455	0.0632	CTCF(Zf)/CD4+CTCF-ChIP-Seq(Barski_et_al.)/Homer	1e-132	489	0.0685	CTCF(Zf)/CD4+CTCF-ChIP-Seq(Barski_et_al.)/Homer	1e-121	461	0.0627
p63(p53)/Keratinocyte-p63-ChIP-Seq(GSE17611)/Homer	1e-91	544	0.0756	p63(p53)/Keratinocyte-p63-ChIP-Seq(GSE17611)/Homer	1e-108	570	0.0799	p63(p53)/Keratinocyte-p63-ChIP-Seq(GSE17611)/Homer	1e-100	567	0.0771
PRDM1(Zf)/Hela-PRDM1-ChIP-Seq(GSE31477)/Homer	1e-68	663	0.0921	PRDM1(Zf)/Hela-PRDM1-ChIP-Seq(GSE31477)/Homer	1e-79	690	0.0967	THRa(NR)/C17.2-THRa-ChIP-Seq(GSE38347)/Homer	1e-71	395	0.0537
THRa(NR)/C17.2-THRa-ChIP-Seq(GSE38347)/Homer	1e-66	405	0.0563	THRa(NR)/C17.2-THRa-ChIP-Seq(GSE38347)/Homer	1e-75	410	0.0574	PRDM1(Zf)/Hela-PRDM1-ChIP-Seq(GSE31477)/Homer	1e-67	716	0.0974
Gata6(Zf)/HUG1N-GATA6-ChIP-Seq(GSE51936)/Homer	1e-61	998	0.1387	THRb(NR)/HepG2-THRb.Flag-ChIP-Seq(Encode)/Homer	1e-62	475	0.0665	THRb(NR)/HepG2-THRb.Flag-ChIP-Seq(Encode)/Homer	1e-57	439	0.0597
COUP-TFII(NR)/K562-NR2F1-ChIP-Seq(Encode)/Homer	1e-55	1167	0.1622	Gata6(Zf)/HUG1N-GATA6-ChIP-Seq(GSE51936)/Homer	1e-58	1027	0.1439	EAR2(NR)/K562-NR2F6-ChIP-Seq(Encode)/Homer	1e-43	1068	0.1453
EAR2(NR)/K562-NR2F6-ChIP-Seq(Encode)/Homer	1e-55	1101	0.153	EAR2(NR)/K562-NR2F6-ChIP-Seq(Encode)/Homer	1e-57	1114	0.1561	Erra(NR)/HepG2-Erra-ChIP-Seq(GSE31477)/Homer	1e-39	1334	0.1815
THRb(NR)/HepG2-THRb.Flag-ChIP-Seq(Encode)/Homer	1e-51	464	0.0645	COUP-TFII(NR)/K562-NR2F1-ChIP-Seq(Encode)/Homer	1e-53	1163	0.1629	COUP-TFII(NR)/K562-NR2F1-ChIP-Seq(Encode)/Homer	1e-38	1124	0.1529
Erra(NR)/HepG2-Erra-ChIP-Seq(GSE31477)/Homer	1e-42	1352	0.1879	Erra(NR)/HepG2-Erra-ChIP-Seq(GSE31477)/Homer	1e-38	1297	0.1817	AP-2alpha(AP2)/Hela-AP2alpha-ChIP-Seq(GSE31477)/Homer	1e-34	324	0.0441
AP-2alpha(AP2)/Hela-AP2alpha-ChIP-Seq(GSE31477)/Homer	1e-35	347	0.0482	bZIP:IRF(bZIP,IRF)/Th17-BatF-ChIP-Seq(GSE39756)/Homer	1e-36	613	0.0859	bZIP:IRF(bZIP,IRF)/Th17-BatF-ChIP-Seq(GSE39756)/Homer	1e-32	655	0.0891
GATA3(Zf)/iTreg-Gata3-ChIP-Seq(GSE20898)/Homer	1e-33	1342	0.1865	AP-2alpha(AP2)/Hela-AP2alpha-ChIP-Seq(GSE31477)/Homer	1e-35	321	0.045	Oct4(POU,Homeobox)/mES-Oct4-ChIP-Seq(GSE11431)/Homer	1e-31	1077	0.1465
H3K9Ac-TSS motifs
0dpa				6dpa				9dpa
Motif Name	P-value	# of Target Sequences with Motif(of 1267)	% of Target Sequences with Motif	Motif Name	P-value	# of Target Sequences with Motif(of 1396)	% of Target Sequences with Motif	Motif Name	P-value	# of Target Sequences with Motif(of 1272)	% of Target Sequences with Motif
Elk4(ETS)/Hela-Elk4-ChIP-Seq(GSE31477)/Homer	1e-25	208	0.1642	ETV1(ETS)/GIST48-ETV1-ChIP-Seq(GSE22441)/Homer	1e-29	272	0.1948	ELF1(ETS)/Jurkat-ELF1-ChIP-Seq(SRA014231)/Homer	1e-22	145	0.114
ETV4(ETS)/HepG2-ETV4-ChIP-Seq(ENCODE)/Homer	1e-25	227	0.1792	ETV4(ETS)/HepG2-ETV4-ChIP-Seq(ENCODE)/Homer	1e-28	264	0.1891	Elf4(ETS)/BMDM-Elf4-ChIP-Seq(GSE88699)/Homer	1e-21	176	0.1384
Elf4(ETS)/BMDM-Elf4-ChIP-Seq(GSE88699)/Homer	1e-24	189	0.1492	ELF1(ETS)/Jurkat-ELF1-ChIP-Seq(SRA014231)/Homer	1e-25	171	0.1225	Elk1(ETS)/Hela-Elk1-ChIP-Seq(GSE31477)/Homer	1e-19	174	0.1368
ELF1(ETS)/Jurkat-ELF1-ChIP-Seq(SRA014231)/Homer	1e-23	155	0.1223	Elk1(ETS)/Hela-Elk1-ChIP-Seq(GSE31477)/Homer	1e-24	208	0.149	ETV1(ETS)/GIST48-ETV1-ChIP-Seq(GSE22441)/Homer	1e-19	220	0.173
ETV1(ETS)/GIST48-ETV1-ChIP-Seq(GSE22441)/Homer	1e-23	232	0.1831	Elk4(ETS)/Hela-Elk4-ChIP-Seq(GSE31477)/Homer	1e-24	225	0.1612	GABPA(ETS)/Jurkat-GABPa-ChIP-Seq(GSE17954)/Homer	1e-19	170	0.1336
Fli1(ETS)/CD8-FLI-ChIP-Seq(GSE20898)/Homer	1e-23	250	0.1973	GABPA(ETS)/Jurkat-GABPa-ChIP-Seq(GSE17954)/Homer	1e-23	206	0.1476	Elk4(ETS)/Hela-Elk4-ChIP-Seq(GSE31477)/Homer	1e-18	188	0.1478
Elk1(ETS)/Hela-Elk1-ChIP-Seq(GSE31477)/Homer	1e-22	183	0.1444	Elf4(ETS)/BMDM-Elf4-ChIP-Seq(GSE88699)/Homer	1e-21	197	0.1411	Fli1(ETS)/CD8-FLI-ChIP-Seq(GSE20898)/Homer	1e-18	235	0.1847
GABPA(ETS)/Jurkat-GABPa-ChIP-Seq(GSE17954)/Homer	1e-20	180	0.1421	Fli1(ETS)/CD8-FLI-ChIP-Seq(GSE20898)/Homer	1e-20	272	0.1948	ELF5(ETS)/T47D-ELF5-ChIP-Seq(GSE30407)/Homer	1e-16	135	0.1061
ERG(ETS)/VCaP-ERG-ChIP-Seq(GSE14097)/Homer	1e-19	215	0.1697	ETS(ETS)/Promoter/Homer	1e-18	129	0.0924	ERG(ETS)/VCaP-ERG-ChIP-Seq(GSE14097)/Homer	1e-16	201	0.158
ETS1(ETS)/Jurkat-ETS1-ChIP-Seq(GSE17954)/Homer	1e-18	184	0.1452	EHF(ETS)/LoVo-EHF-ChIP-Seq(GSE49402)/Homer	1e-15	221	0.1583	EHF(ETS)/LoVo-EHF-ChIP-Seq(GSE49402)/Homer	1e-15	199	0.1564
ELF5(ETS)/T47D-ELF5-ChIP-Seq(GSE30407)/Homer	1e-16	141	0.1113	Etv2(ETS)/ES-ER71-ChIP-Seq(GSE59402)/Homer(0.967)	1e-15	155	0.111	ETS(ETS)/Promoter/Homer	1e-15	104	0.0818
ETS(ETS)/Promoter/Homer	1e-16	112	0.0884	ERG(ETS)/VCaP-ERG-ChIP-Seq(GSE14097)/Homer	1e-14	220	0.1576	ETV4(ETS)/HepG2-ETV4-ChIP-Seq(ENCODE)/Homer	1e-15	197	0.1549
EHF(ETS)/LoVo-EHF-ChIP-Seq(GSE49402)/Homer	1e-15	203	0.1602	NRF1(NRF)/MCF7-NRF1-ChIP-Seq(Unpublished)/Homer	1e-14	54	0.0387	ELF3(ETS)/PDAC-ELF3-ChIP-Seq(GSE64557)/Homer	1e-13	118	0.0928
Etv2(ETS)/ES-ER71-ChIP-Seq(GSE59402)/Homer(0.967)	1e-14	140	0.1105	ETS1(ETS)/Jurkat-ETS1-ChIP-Seq(GSE17954)/Homer	1e-13	190	0.1361	YY1(Zf)/Promoter/Homer	1e-13	46	0.0362
FOXK1(Forkhead)/HEK293-FOXK1-ChIP-Seq(GSE51673)/Homer	1e-13	389	0.307	FOXK1(Forkhead)/HEK293-FOXK1-ChIP-Seq(GSE51673)/Homer	1e-13	416	0.298	ETS1(ETS)/Jurkat-ETS1-ChIP-Seq(GSE17954)/Homer	1e-12	164	0.1289
Temporal motifs
Gene	% of Target Sequences with Motif
	0dpa	6dpa	9dpa	6dpa-0dpa	9dpa-6dpa	9dpa-0dpa
H3K9Ac-integrgeinc motifs
Cdx2	0	0.1352	0.1413	0.1352	0.0061	0.1413
Eomes	0.2755	0.2752	0	-0.0003	-0.2752	-0.2755
Foxa2	0	0.17	0.1718	0.17	0.0018	0.1718
FoxL2	0	0.2146	0.2269	0.2146	0.0123	0.2269
Gata4	0	0.1343	0.1313	0.1343	-0.003	0.1313
Hoxa11	0	0	0.3833	0	0.3833	0.3833
HOXB13	0	0.1825	0.1846	0.1825	0.0021	0.1846
Smad3	0	0.2752	0	0.2752	-0.2752	0
H3K9Me3-intergenic motis
Gata4	0.112	0.1129	0	0.0009	-0.1129	-0.112
OCT(POU,Homeobox)	0.1096	0	0.1397	-0.1096	0.1397	0.0301
THRb(NR)	0	0.3291	0	0.3291	-0.3291	0
H3K9Ac-TSS motis
BMYB(HTH)	0.2841	0.2808	0	-0.0033	-0.2808	-0.2841
Cdx2	0	0.1418	0	0.1418	-0.1418	0
CDX4	0	0.1798	0	0.1798	-0.1798	0
GATA3(Zf)	0	0.1934	0	0.1934	-0.1934	0
HIF-1b(HLH)	0	0.2428	0	0.2428	-0.2428	0
Hoxa11(Homeobox)	0.4073	0.3976	0	-0.0097	-0.3976	-0.4073
Hoxd13(Homeobox)	0.2904	0	0	-0.2904	0	-0.2904
MITF(bHLH)	0	0	0.1124	0	0.1124	0.1124
Six2(Homeobox)	0.1413	0	0	-0.1413	0	-0.1413
Tgif2(Homeobox)	0.4136	0	0.408	-0.4136	0.408	-0.0056
H3K9Me3-TSS motifs
ETS(ETS)	1e-06	0.106	1e-06	0.106	-0.106	1e-06
ELF1(ETS)	1e-05	0.1244	1e-05	0.1244	-0.1244	1e-05
Elf4(ETS)	0.0001	0.1382	0.0001	0.1382	-0.1382	0.0001
Elk1(ETS)	0.0001	0.1382	0.0001	0.1382	-0.1382	0.0001
Elk4(ETS)	0.0001	0.1475	0.0001	0.1475	-0.1475	0.0001
ETV1(ETS)	0.0001	0.1705	0.0001	0.1705	-0.1705	0.0001
ETV4(ETS)	0.0001	0.1613	0.0001	0.1613	-0.1613	0.0001
GABPA(ETS)	0.0001	0.1429	0.0001	0.1429	-0.1429	0.0001
ERG(ETS)	0.001	0.1613	0.001	0.1613	-0.1613	0.001
ETS1(ETS)/Jurkat-ETS1-ChIP-Seq(GSE17954)/Homer	0.001	0.1336	0	0.1336	-0.1336	0
