# Supplementary material for: Keratin5-BMP4 Mechanosignaling Network Regulates Cell Cytoskeletal Reorganization and Chromatin Accessibility during Revascularization-Based Blastema Regeneration
Source: Preprints.org preprint supplement (doi:10.20944/preprints202104.0642.v1), 2021-04-23
Supplement: Supplementary file 6 [file Table S5 Prediciton of H3K9Ac-:H3K9Me3-specific enhancer motifs at three core blastema genes.xlsx]

## Sheet: Table S5
Table S5 Prediciton of H3K9Ac-/H3K9Me3-specific enhancer motifs at three core blastema genes
TF target gene	Chr	Start	End	PeakID-TF	motif score	Annotation	Distance to TSS	Entrez ID
kdrl
	chr14	32704275	32704275	H3K9ac_0d_peak_3027-p63	7.33333	Promoter-TSS (NM_131472)	-34	796537
	chr14	32704275	32704275	H3K9ac_0d_peak_3027-Erra	7.85663	Promoter-TSS (NM_131472)	-34	796537
	chr14	32755218	32755218	H3K9ac_6d_peak_4042-Gata6	6.53984	Intergenic	-50977	796537
	chr14	32755218	32755218	H3K9ac_6d_peak_4042-FOXK1	6.67546	Intergenic	-50977	796537
	chr14	32755504	32755504	H3K9ac_6d_peak_4043-FOXK1	6.67546	Intergenic	-51263	796537
	chr14	32755218	32755218	H3K9ac_6d_peak_4042-GATA3	5.98984	Intergenic	-50977	796537
	chr14	32813399	32813399	H3K9ac_9d_peak_3471-Tcfcp2l1	8.21045	Intergenic	-109158	796537
	chr14	32813399	32813399	H3K9ac_9d_peak_3471-p63	8.93253	Intergenic	-109158	796537
	chr14	32813399	32813399	H3K9ac_9d_peak_3471-p63-2	8.83496	Intergenic	-109158	796537
acta2
	chr12	16978736	16978736	H3K9ac_0d_peak_1886-Tcfcp2l1	8.28777	Intron (NM_212620, Intron 1 of 8)	137	322509
	chr12	16978736	16978736	H3K9ac_0d_peak_1886-p63	7.10048	Intron (NM_212620, Intron 1 of 8)	137	322509
	chr12	16978736	16978736	H3K9ac_0d_peak_1886-EAR2	8.5225	Intron (NM_212620, Intron 1 of 8)	137	322509
	chr12	16978736	16978736	H3K9ac_0d_peak_1886-COUP-TFII	7.72191	Intron (NM_212620, Intron 1 of 8)	137	322509
	chr12	16978736	16978736	H3K9ac_0d_peak_1886-Gata6	7.12196	Intron (NM_212620, Intron 1 of 8)	137	322509
	chr12	16978736	16978736	H3K9ac_0d_peak_1886-PPARE	8.07739	Intron (NM_212620, Intron 1 of 8)	137	322509
	chr12	16978736	16978736	H3K9ac_0d_peak_1886-COUP-TFII	7.87248	Intron (NM_212620, Intron 1 of 8)	137	322509
	chr12	16981458	16981458	H3K9me3_0d_peak_550-Gata6	6.90736	Intron (NM_212620, Intron 2 of 8)	2859	322509
	chr12	16981458	16981458	H3K9me3_0d_peak_550-COUP-TFII	7.51614	Intron (NM_212620, Intron 2 of 8)	2859	322509
	chr12	16981458	16981458	H3K9me3_0d_peak_550-EAR2	7.34322	Intron (NM_212620, Intron 2 of 8)	2859	322509
	chr12	16981458	16981458	H3K9me3_0d_peak_550-GATA3	7.65818	Intron (NM_212620, Intron 2 of 8)	2859	322509
pax3a
	chr2	47577477	47577477	H3K9ac_0d_peak_6513-EAR2	8.23057	Exon (NM_131277, Exon 2 of 8)	1223	30532
	chr2	47577477	47577477	H3K9ac_0d_peak_6513-COUP-TFII	8.59433	Exon (NM_131277, Exon 2 of 8)	1223	30532
	chr2	47577477	47577477	H3K9ac_0d_peak_6513-AP-2alpha	7.92592	Exon (NM_131277, Exon 2 of 8)	1223	30532
	chr2	47577477	47577477	H3K9ac_0d_peak_6513-AP-2alpha-2	6.95458	Exon (NM_131277, Exon 2 of 8)	1223	30532
	chr2	47577477	47577477	H3K9ac_0d_peak_6513-Erra	7.83776	Exon (NM_131277, Exon 2 of 8)	1223	30532
	chr2	47577477	47577477	H3K9ac_0d_peak_6513-AP-2gamma-2	8.70023	Exon (NM_131277, Exon 2 of 8)	1223	30532
	chr2	47577477	47577477	H3K9ac_0d_peak_6513-AP-2gamma	7.91132	Exon (NM_131277, Exon 2 of 8)	1223	30532
	chr2	47577477	47577477	H3K9ac_0d_peak_6513-PPARE	9.08768	Exon (NM_131277, Exon 2 of 8)	1223	30532
	chr2	47577477	47577477	H3K9ac_0d_peak_6513-COUP-TFII	8.06624	Exon (NM_131277, Exon 2 of 8)	1223	30532
	chr2	47577470	47577470	H3K9ac_9d_peak_7557-AP-2alpha	7.92592	Exon (NM_131277, Exon 2 of 8)	1230	30532
	chr2	47577470	47577470	H3K9ac_9d_peak_7557-AP-2alpha-2	6.95458	Exon (NM_131277, Exon 2 of 8)	1230	30532
	chr2	47055517	47055517	H3K9ac_9d_peak_7556-FOXK1	7.52903	Intergenic	523183	30532
	chr2	47055517	47055517	H3K9ac_9d_peak_7556-Foxo3	6.75162	Intergenic	523183	30532
	chr2	47577470	47577470	H3K9ac_9d_peak_7557-EAR2	8.23057	Exon (NM_131277, Exon 2 of 8)	1230	30532
	chr2	47577470	47577470	H3K9ac_9d_peak_7557-COUP-TFII	8.59433	Exon (NM_131277, Exon 2 of 8)	1230	30532
	chr2	47577470	47577470	H3K9ac_9d_peak_7557-AP-2gamma-2	8.70023	Exon (NM_131277, Exon 2 of 8)	1230	30532
	chr2	47577470	47577470	H3K9ac_9d_peak_7557-AP-2gamma	7.91132	Exon (NM_131277, Exon 2 of 8)	1230	30532
	chr2	47577470	47577470	H3K9ac_9d_peak_7557-Erra	7.83776	Exon (NM_131277, Exon 2 of 8)	1230	30532
	chr2	47055517	47055517	H3K9ac_9d_peak_7556-Erra	6.20348	Intergenic	523183	30532
	chr2	47576628	47576628	H3K9me3_0d_peak_1798-Gata6	7.20397	Exon (NM_131277, Exon 3 of 8)	2072	30532
	chr2	47577507	47577507	H3K9me3_0d_peak_1799-COUP-TFII	8.59433	Exon (NM_131277, Exon 2 of 8)	1193	30532
	chr2	47576628	47576628	H3K9me3_0d_peak_1798-COUP-TFII	7.37981	Exon (NM_131277, Exon 3 of 8)	2072	30532
	chr2	47577507	47577507	H3K9me3_0d_peak_1799-EAR2	8.23057	Exon (NM_131277, Exon 2 of 8)	1193	30532
	chr2	47576628	47576628	H3K9me3_0d_peak_1798-EAR2	8.20266	Exon (NM_131277, Exon 3 of 8)	2072	30532
	chr2	47539252	47539252	H3K9me3_0d_peak_1796-EAR2	7.19718	Exon (NM_131277, Exon 7 of 8)	39448	30532
	chr2	47577507	47577507	H3K9me3_0d_peak_1799-AP-2alpha	7.92592	Exon (NM_131277, Exon 2 of 8)	1193	30532
	chr2	47577507	47577507	H3K9me3_0d_peak_1799-AP-2alpha-2	6.95458	Exon (NM_131277, Exon 2 of 8)	1193	30532
	chr2	47576628	47576628	H3K9me3_0d_peak_1798-GATA3	7.47077	Exon (NM_131277, Exon 3 of 8)	2072	30532
	chr2	47577507	47577507	H3K9me3_0d_peak_1799-Erra	7.83776	Exon (NM_131277, Exon 2 of 8)	1193	30532
	chr2	47539252	47539252	H3K9me3_0d_peak_1796-Erra	7.74923	Exon (NM_131277, Exon 7 of 8)	39448	30532
	chr2	47576628	47576628	H3K9me3_0d_peak_1798-Erra	7.2346	Exon (NM_131277, Exon 3 of 8)	2072	30532
	chr2	47576628	47576628	H3K9me3_6d_peak_1211-Gata6	7.20397	Exon (NM_131277, Exon 3 of 8)	2072	30532
	chr2	47577507	47577507	H3K9me3_6d_peak_1212-EAR2	8.23057	Exon (NM_131277, Exon 2 of 8)	1193	30532
	chr2	47576628	47576628	H3K9me3_6d_peak_1211-EAR2	8.20266	Exon (NM_131277, Exon 3 of 8)	2072	30532
	chr2	47539270	47539270	H3K9me3_6d_peak_1210-EAR2	7.19718	Exon (NM_131277, Exon 7 of 8)	39430	30532
	chr2	47577507	47577507	H3K9me3_6d_peak_1212-COUP-TFII	8.59433	Exon (NM_131277, Exon 2 of 8)	1193	30532
	chr2	47576628	47576628	H3K9me3_6d_peak_1211-COUP-TFII	7.37981	Exon (NM_131277, Exon 3 of 8)	2072	30532
	chr2	47577507	47577507	H3K9me3_6d_peak_1212-AP-2alpha	7.92592	Exon (NM_131277, Exon 2 of 8)	1193	30532
	chr2	47577507	47577507	H3K9me3_6d_peak_1212-AP-2alpha-2	6.95458	Exon (NM_131277, Exon 2 of 8)	1193	30532
	chr2	47577507	47577507	H3K9me3_6d_peak_1212-Erra	7.83776	Exon (NM_131277, Exon 2 of 8)	1193	30532
	chr2	47539270	47539270	H3K9me3_6d_peak_1210-Erra	7.74923	Exon (NM_131277, Exon 7 of 8)	39430	30532
	chr2	47576628	47576628	H3K9me3_6d_peak_1211-Erra	7.2346	Exon (NM_131277, Exon 3 of 8)	2072	30532
	chr2	47576628	47576628	H3K9me3_6d_peak_1211-GATA3	7.47077	Exon (NM_131277, Exon 3 of 8)	2072	30532
	chr2	47539270	47539270	H3K9me3_6d_peak_1210-GATA3	6.74641	Exon (NM_131277, Exon 7 of 8)	39430	30532
	chr2	47577507	47577507	H3K9me3_6d_peak_1212-AP-2gamma-2	8.70023	Exon (NM_131277, Exon 2 of 8)	1193	30532
	chr2	47577507	47577507	H3K9me3_6d_peak_1212-AP-2gamma	7.91132	Exon (NM_131277, Exon 2 of 8)	1193	30532
	chr2	47539270	47539270	H3K9me3_6d_peak_1210-Oct4	8.31479	Exon (NM_131277, Exon 7 of 8)	39430	30532
	chr2	47577507	47577507	H3K9me3_6d_peak_1212-COUP-TFII	8.06624	Exon (NM_131277, Exon 2 of 8)	1193	30532
	chr2	47576628	47576628	H3K9me3_6d_peak_1211-COUP-TFII	6.83471	Exon (NM_131277, Exon 3 of 8)	2072	30532
	chr2	47539270	47539270	H3K9me3_6d_peak_1210-COUP-TFII	6.74548	Exon (NM_131277, Exon 7 of 8)	39430	30532
	chr2	47577485	47577485	H3K9me3_9d_peak_985-EAR2	8.23057	Exon (NM_131277, Exon 2 of 8)	1215	30532
	chr2	47576622	47576622	H3K9me3_9d_peak_984-EAR2	8.20266	Exon (NM_131277, Exon 3 of 8)	2078	30532
	chr2	47539261	47539261	H3K9me3_9d_peak_983-EAR2	7.19718	Exon (NM_131277, Exon 7 of 8)	39439	30532
	chr2	47117704	47117704	H3K9me3_9d_peak_982-EAR2	6.74567	Intergenic	460996	30532
	chr2	47577485	47577485	H3K9me3_9d_peak_985-COUP-TFII	8.59433	Exon (NM_131277, Exon 2 of 8)	1215	30532
	chr2	47576622	47576622	H3K9me3_9d_peak_984-COUP-TFII	7.37981	Exon (NM_131277, Exon 3 of 8)	2078	30532
	chr2	47117704	47117704	H3K9me3_9d_peak_982-COUP-TFII	6.69996	Intergenic	460996	30532
	chr2	47577485	47577485	H3K9me3_9d_peak_985-Erra	7.83776	Exon (NM_131277, Exon 2 of 8)	1215	30532
	chr2	47539261	47539261	H3K9me3_9d_peak_983-Erra	7.74923	Exon (NM_131277, Exon 7 of 8)	39439	30532
	chr2	47576622	47576622	H3K9me3_9d_peak_984-Erra	7.2346	Exon (NM_131277, Exon 3 of 8)	2078	30532
	chr2	47576622	47576622	H3K9me3_9d_peak_984-Gata6	7.20397	Exon (NM_131277, Exon 3 of 8)	2078	30532
	chr2	47539261	47539261	H3K9me3_9d_peak_983-Oct4	8.31479	Exon (NM_131277, Exon 7 of 8)	39439	30532
	chr2	47577485	47577485	H3K9me3_9d_peak_985-AP-2alpha	7.92592	Exon (NM_131277, Exon 2 of 8)	1215	30532
	chr2	47577485	47577485	H3K9me3_9d_peak_985-AP-2alpha-2	6.95458	Exon (NM_131277, Exon 2 of 8)	1215	30532
	chr2	47577485	47577485	H3K9me3_9d_peak_985-AP-2gamma-2	8.70023	Exon (NM_131277, Exon 2 of 8)	1215	30532
	chr2	47577485	47577485	H3K9me3_9d_peak_985-AP-2gamma	7.91132	Exon (NM_131277, Exon 2 of 8)	1215	30532
