# Supplementary material for: Keratin5-BMP4 Mechanosignaling Network Regulates Cell Cytoskeletal Reorganization and Chromatin Accessibility during Revascularization-Based Blastema Regeneration
Source: Preprints.org preprint supplement (doi:10.20944/preprints202104.0642.v1), 2021-04-23
Supplement: Supplementary file 7 [file Table S6 Key blastema effectors identified by functional annotation clustering of the subcellular fraction proteins.xlsx]

## Sheet: Table S6
Table S6 Key blastema effectors identified by functional annotation clustering of the subcellular fraction proteins
Gene classfication	Transcripts			Protein
				Fraction I		Fraction II		Fraction III
	0 dpa	6dpa	9dpa	0dpa	6dpa	0dpa	6dpa	0dpa	6dpa
Extracellular region
apoeb	9.16023	110.986	5.7903	0	0	6.83807e+06	0	2.47372e+06	1.55931e+07
col11a1b	0.794506	10.6249	10.4939	0	1.61196e+06	0	0	0	0
col1a1a	83.8173	364.174	298.798	2.67228e+08	1.36151e+08	1.512e+06	6.99741e+06	9.72133e+06	2.08515e+06
col1a1b	105.604	368.647	318.317	1364732238	5.10617e+08	4.50725e+07	3.30996e+07	3.50797e+07	3.42125e+06
col1a2	92.4016	393.453	329.112	3276919127	1402571084	1.15195e+08	6.05341e+07	1.14732e+08	990926
dcn	105.321	239.692	212.405	722790	0	1.09092e+07	1.13036e+07	0	1.28002e+07
fn1b	120.817	559.775	523.067	3.75708e+07	2.61855e+08	5.11706e+07	3.91698e+08	1.23567e+08	1.72849e+08
tfa	75.8691	348.447	167.783	9.91485e+08	7.40828e+08	3997645839	1394483276	10747720187	12262914770
tg	13.419	0.172493	1.32621	1.00726e+07	6.95425e+06	0	0	0	3.25355e+07
lum	7.92725	38.3542	24.4761	1.38349e+08	1.02616e+08	5.10965e+07	1.22375e+08	3.71869e+07	2.70359e+08
Intermediate filaments
krt15	457.811	968.11	1094.99	4.47214e+06	8.50983e+07	644078	3.39406e+07	7.77007e+06	2.42436e+07
krt5	2.51472	99.4094	9.64857	1.78456e+09	1.86522e+09	1.2968e+09	2.60965e+09	3.88769e+08	2.18048e+09
krt91	119	293.935	161.842	3.84973e+07	1.52077e+08	4.9839e+07	1.0564e+08	5.19492e+07	7.37502e+07
krt97	0.694629	15.5774	1.76377	0	1.01528e+06	0	1.07534e+06	1.2752e+06	622439
lamb1a	12.6119	27.5642	30.2643	0	0	0	1.42794e+07	0	2.05987e+07
Porphyrin and chlorophyll metabolism
cpox	16.3663	20.0146	36.1534	0	2.80968e+07	0	0	7.64072e+06	0
tfr1a	38.8353	109.36	105.523	0	1.90051e+07	7.33165e+07	1.14925e+08	6.2358e+06	5.78775e+06
tfa	75.8691	348.447	167.783	9.91485e+08	7.40828e+08	3997645839	1394483276	10747720187	12262914770
