# Supplementary material for: Keratin5-BMP4 Mechanosignaling Network Regulates Cell Cytoskeletal Reorganization and Chromatin Accessibility during Revascularization-Based Blastema Regeneration
Source: Preprints.org preprint supplement (doi:10.20944/preprints202104.0642.v1), 2021-04-23
Supplement: Supplementary file 8 [file Table S7 ATAC-Seq analyses of chromatin accessibility and known motif enrichment in PAC2 cells.xlsx]

## Sheet: Table S7
Table S7 ATAC-Seq analyses of chromatin accessibility and known motif enrichment in PAC2 cells
1. Annotation for differential accessible regions
Fold Change	Chr	Start	End	Annotation	Distance to TSS	Entrez ID	Nearest Gene	Gene Description	Differential Chromatin Accessibility
1.97338-2	chr25	5165159	5166218	Exon (NM_001007420, Exon 2 of 5)	3636	492779	nansb	N-acetylneuraminic acid synthase b	WT to +Krt5; Hyper
1.73761-2	chr22	31172941	31173957	Intergenic	62669	798071	sec13	SEC13 homolog, nuclear pore and COPII coat complex component	WT to +Krt5; Hyper
1.711-2	chr20	10437256	10438255	Intergenic	62892	406294	glrx5	glutaredoxin 5 homolog (S. cerevisiae)	WT to +Krt5; Hyper
1.69705-2	chr4	8434459	8435458	Intergenic	-96300	30105	wnt5b	wingless-type MMTV integration site family, member 5b	WT to +Krt5; Hyper
1.68734-2	chr16	1203265	1204264	Intergenic	275371	260351	sim1a	SIM bHLH transcription factor 1a	WT to +Krt5; Hyper
1.67191-2	chr17	21759587	21760970	Intergenic	4123	555632	hmx2	H6 family homeobox 2	WT to +Krt5; Hyper
1.66747-2	chr13	13210663	13211743	Intergenic	-47464	58129	fgfr3	fibroblast growth factor receptor 3	WT to +Krt5; Hyper
1.61166-2	chr18	1211514	1212513	Intergenic	-127314	406433	dhdhl	dihydrodiol dehydrogenase (dimeric), like	WT to +Krt5; Hyper
1.60542-2	chr7	1025356	1026355	Intergenic	-71798	407638	dctn1a	dynactin 1a	WT to +Krt5; Hyper
1.59866-2	chr18	49311762	49312761	Intergenic	58649	492462	yif1b	Yip1 interacting factor homolog B (S. cerevisiae)	WT to +Krt5; Hyper
1.59272-2	chr20	42279929	42280928	Intergenic	63891	436629	nus1	NUS1 dehydrodolichyl diphosphate synthase subunit	WT to +Krt5; Hyper
1.58316-2	chr5	53118112	53119111	Intergenic	-59736	436827	sat2b	spermidine/spermine N1-acetyltransferase family member 2b	WT to +Krt5; Hyper
1.58297-2	chr18	25958820	25959901	Intergenic	-90629	572261	sema4ba	sema domain, immunoglobulin domain (Ig), transmembrane domain (TM) and short cytoplasmic domain, (semaphorin) 4Ba	WT to +Krt5; Hyper
1.56772-2	chr8	21283014	21284081	Exon (NM_001313811, Exon 28 of 60)	-38308	64607	alas2	aminolevulinate, delta-, synthase 2	WT to +Krt5; Hyper
1.56608-2	chr21	25478852	25479851	Intergenic	85692	572703	efemp2b	EGF containing fibulin extracellular matrix protein 2b	WT to +Krt5; Hyper
1.55834-2	chr6	42568182	42569181	Intergenic	-148052	322041	ip6k2a	inositol hexakisphosphate kinase 2a	WT to +Krt5; Hyper
1.54911-2	chr3	4591308	4592575	Intron (NM_001076616, Intron 1 of 15)	106	767677	rangap1a	RAN GTPase activating protein 1a	WT to +Krt5; Hyper
1.5387-2	chr8	26745070	26746069	Intron (NM_001128289, Intron 2 of 14)	27920	100003663	kazna	kazrin, periplakin interacting protein a	WT to +Krt5; Hyper
1.53471-2	chr6	7747027	7748064	Intron (NM_001080085, Intron 1 of 9)	5473	790940	palm3	paralemmin 3	WT to +Krt5; Hyper
1.5217-2	chr6	5885294	5886293	Intergenic	205897	447816	rtn4a	reticulon 4a	WT to +Krt5; Hyper
1.52065-2	chr6	43347428	43348427	Intergenic	-44931	30080	mitfa	melanocyte inducing transcription factor a	WT to +Krt5; Hyper
1.51805-2	chr7	5399810	5400884	Intergenic	-34987	565268	arhgef11	Rho guanine nucleotide exchange factor (GEF) 11	WT to +Krt5; Hyper
1.51558-2	chr4	7111927	7112926	Intergenic	251149	654774	dock4b	dedicator of cytokinesis 4b	WT to +Krt5; Hyper
1.51437-2	chr6	31574402	31575456	Intergenic	193772	30280	jak1	Janus kinase 1	WT to +Krt5; Hyper
1.51427-2	chr5	33698494	33699563	Intergenic	-114066	567525	fibcd1	fibrinogen C domain containing 1	WT to +Krt5; Hyper
1.51263-2	chr4	13985816	13987479	Intergenic	-12283	556148	prickle1b	prickle homolog 1b	WT to +Krt5; Hyper
1.50867-2	chr5	2015130	2017094	Intron (NM_200293, Intron 3 of 3)	-2068	555196	ca4a	carbonic anhydrase IV a	WT to +Krt5; Hyper
1.50399-2	chr7	10526737	10527736	Intron (NM_131674, Intron 7 of 19)	66938	64277	arnt2	aryl-hydrocarbon receptor nuclear translocator 2	WT to +Krt5; Hyper
2.7135	chr12	31205036	31206067	Intron (NM_001313750, Intron 5 of 7)	102081	567385	vti1a	vesicle transport through interaction with t-SNAREs 1A	WT to +Krt5; Hyper
2.53533	chr3	12990205	12991204	Intergenic	-48986	553188	sun1	Sad1 and UNC84 domain containing 1	WT to +Krt5; Hyper
2.42914	chr10	39368802	39369801	Intron (NM_205588, Intron 5 of 5)	6789	402850	dcps	decapping enzyme, scavenger	WT to +Krt5; Hyper
2.42293	chr4	72453193	72454192	Intergenic	90531	796738	si:cabz01069013.3	si:cabz01069013.3	WT to +Krt5; Hyper
2.39111	chr5	63289441	63290440	Intron (NM_001278808, Intron 14 of 21)	132873	101448001	pappab	pregnancy-associated plasma protein A, pappalysin 1b	WT to +Krt5; Hyper
2.38118	chr22	33089257	33090256	Intergenic	-90926	286829	dag1	dystroglycan 1	WT to +Krt5; Hyper
2.3691	chr8	12950914	12951928	TTS (NM_001077294)	20885	768151	dennd2da	DENN/MADD domain containing 2Da	WT to +Krt5; Hyper
2.35635	chr8	53811010	53812009	Intron (NM_001327807, Intron 2 of 2)	8055	101883439	lrtm1	leucine rich repeats and transmembrane domains 1	WT to +Krt5; Hyper
2.35399	chr8	30121565	30122569	Intron (NM_001040637, Intron 3 of 12)	14002	692127	fancc	FA complementation group C	WT to +Krt5; Hyper
2.33265	chr1	56105009	56106008	Intergenic	-172615	100135433	sc:d0284	sc:d0284	WT to +Krt5; Hyper
2.3243	chr2	52611239	52612238	Intergenic	81837	561308	theg	theg spermatid protein	WT to +Krt5; Hyper
2.30015	chr16	23447592	23448591	Intergenic	-20241	751643	krtcap2	keratinocyte associated protein 2	WT to +Krt5; Hyper
2.26823	chr14	29590888	29591887	Intergenic	-43659	562008	cyp4v7	cytochrome P450, family 4, subfamily V, polypeptide 7	WT to +Krt5; Hyper
2.24809	chr15	25459762	25460761	Intergenic	-28290	562666	cluha	clustered mitochondria (cluA/CLU1) homolog a	WT to +Krt5; Hyper
2.24435	chr14	14606988	14607987	Intergenic	71356	407727	slbp	stem-loop binding protein	WT to +Krt5; Hyper
2.22281	chr13	38414481	38415721	Intergenic	251070	323720	lmbrd1	LMBR1 domain containing 1	WT to +Krt5; Hyper
2.20273	chr18	4520369	4521368	Intergenic	484034	393527	pdcd10a	programmed cell death 10a	WT to +Krt5; Hyper
2.18546	chr12	45746990	45747989	Intergenic	-33326	60638	pax2b	paired box 2b	WT to +Krt5; Hyper
2.16864	chr1	50621934	50622946	Intergenic	44901	794020	ndufaf5	NADH:ubiquinone oxidoreductase complex assembly factor 5	WT to +Krt5; Hyper
2.16472	chr3	32759098	32760097	Intergenic	10833	767644	kat7a	K(lysine) acetyltransferase 7a	WT to +Krt5; Hyper
2.15946	chr21	34387207	34388206	Intron (NM_152955, Intron 6 of 11)	-160412	557181	alg13	ALG13 UDP-N-acetylglucosaminyltransferase subunit	WT to +Krt5; Hyper
2.14657	chr21	6626538	6627537	Intergenic	-202136	445092	olfm1b	olfactomedin 1b	WT to +Krt5; Hyper
2.14345	chr1	24396117	24397172	Intergenic	89578	323681	tmem154	transmembrane protein 154	WT to +Krt5; Hyper
2.13428	chr21	16173750	16174752	Intergenic	9128	100307097	si:ch73-110p20.1	si:ch73-110p20.1	WT to +Krt5; Hyper
2.13116	chr17	44497695	44498694	Intergenic	-144288	100535864	cipca	CLOCK-interacting pacemaker a	WT to +Krt5; Hyper
2.11392	chr4	2255003	2256002	Intergenic	12096	559479	frs2a	fibroblast growth factor receptor substrate 2a	WT to +Krt5; Hyper
2.11354	chr11	7155030	7156047	Intron (NM_200900, Intron 1 of 5)	6654	393874	tmem38a	transmembrane protein 38A	WT to +Krt5; Hyper
2.10269	chr24	31536311	31537310	Intergenic	99636	393136	cpne3	copine III	WT to +Krt5; Hyper
2.09227	chr23	43132251	43133250	Intergenic	211936	450006	myl9a	myosin, light chain 9a, regulatory	WT to +Krt5; Hyper
2.08916	chr10	28016451	28017450	Intergenic	125441	553563	ints2	integrator complex subunit 2	WT to +Krt5; Hyper
2.08666	chr14	14358763	14359762	Intergenic	-5742	550369	nsdhl	NAD(P) dependent steroid dehydrogenase-like	WT to +Krt5; Hyper
2.08509	chr23	4732528	4733527	Intergenic	36038	326846	cnbpa	CCHC-type zinc finger, nucleic acid binding protein a	WT to +Krt5; Hyper
2.08063	chr19	41687878	41688877	Intergenic	-62388	561007	pdk4	pyruvate dehydrogenase kinase, isozyme 4	WT to +Krt5; Hyper
2.0746	chr21	33651029	33652028	Intergenic	227465	30645	cd74b	CD74 molecule, major histocompatibility complex, class II invariant chain b	WT to +Krt5; Hyper
2.07196	chr6	14118527	14119526	Intron (NM_001128547, Intron 4 of 21)	43844	792527	inpp4ab	inositol polyphosphate-4-phosphatase type I Ab	WT to +Krt5; Hyper
2.06918	chr3	12945597	12946658	Intergenic	-18854	767685	prkar1b	protein kinase, cAMP-dependent, regulatory, type I, beta	WT to +Krt5; Hyper
2.06765	chr6	28126968	28127967	Intergenic	-87572	57924	smx5	smx5	WT to +Krt5; Hyper
2.06441	chr1	42727466	42728465	Intergenic	255423	436850	suclg1	succinate-CoA ligase, alpha subunit	WT to +Krt5; Hyper
2.05677	chr5	4327277	4328276	Intergenic	-54430	569092	angptl2a	angiopoietin-like 2a	WT to +Krt5; Hyper
2.05313	chr12	29495423	29496422	Intergenic	-152832	79377	gfra1b	gdnf family receptor alpha 1b	WT to +Krt5; Hyper
2.0501	chr12	27025015	27026014	Promoter-TSS (NM_131181)	-735	30420	hoxb8b	homeobox B8b	WT to +Krt5; Hyper
2.04403	chr9	28328961	28330058	Intergenic	35636	100006589	idh1	isocitrate dehydrogenase 1 (NADP+), soluble	WT to +Krt5; Hyper
2.0303	chr18	27112869	27113868	Intergenic	-5756	571486	plekha7a	pleckstrin homology domain containing, family A member 7a	WT to +Krt5; Hyper
2.02158	chr15	19933322	19934445	Intron (NM_212634, Intron 11 of 15)	-14627	327466	dyrk1ab	dual-specificity tyrosine-(Y)-phosphorylation regulated kinase 1A, b	WT to +Krt5; Hyper
2.02025	chr9	22577636	22578635	Intergenic	23899	550617	crygs3	crystallin, gamma S3	WT to +Krt5; Hyper
2.01493	chr14	4733850	4734849	Intergenic	-75889	322903	nanos1	nanos homolog 1	WT to +Krt5; Hyper
2.01135	chr22	34888042	34889041	Intron (NM_001034975, Intron 30 of 36)	73174	561685	slit1b	slit homolog 1b (Drosophila)	WT to +Krt5; Hyper
2.00773	chr5	60690816	60691901	Intron (NM_199780, Intron 2 of 8)	14264	327294	castor2	cytosolic arginine sensor for mTORC1 subunit 2	WT to +Krt5; Hyper
2.00522	chr9	1469451	1470450	Intron (NM_001127402, Intron 5 of 8)	11641	568524	rbm45	RNA binding motif protein 45	WT to +Krt5; Hyper
1.99963	chr22	2608881	2609880	Intron (NM_001013285, Intron 1 of 4)	-34885	503527	znf1162	zinc finger protein 1162	WT to +Krt5; Hyper
1.99657	chr9	18236749	18237912	Intron (NM_001003476, Intron 4 of 5)	29093	445082	dnajc15	DnaJ (Hsp40) homolog, subfamily C, member 15	WT to +Krt5; Hyper
1.98708	chr1	27611266	27612265	Intergenic	214354	30442	ednrba	endothelin receptor Ba	WT to +Krt5; Hyper
1.98136	chr20	17034838	17036397	Intergenic	-28603	436862	psma6b	proteasome subunit alpha 6b	WT to +Krt5; Hyper
1.97338	chr11	27502922	27504317	Intergenic	-44193	565979	fam120a	family with sequence similarity 120A	WT to +Krt5; Hyper
1.97084	chr16	28855464	28856463	Intergenic	-1565	100124619	zgc:171704	zgc:171704	WT to +Krt5; Hyper
1.96763	chr11	15923064	15924063	Intron (NM_001201345, Intron 4 of 4)	-12252	553763	ctbs	chitobiase, di-N-acetyl-	WT to +Krt5; Hyper
1.96748	chr10	40323153	40324152	Intergenic	-39165	567190	git2b	G protein-coupled receptor kinase interacting ArfGAP 2b	WT to +Krt5; Hyper
1.96605	chr17	1165994	1166993	Intergenic	-195392	393216	dnajc17	DnaJ (Hsp40) homolog, subfamily C, member 17	WT to +Krt5; Hyper
1.96596	chr1	15995525	15996605	Promoter-TSS (NM_001017793)	-37	550491	frg1	FSHD region gene 1	WT to +Krt5; Hyper
1.96144	chr4	52390339	52391338	Intergenic	-165636	100008037	si:ch211-227e10.6	si:ch211-227e10.6	WT to +Krt5; Hyper
1.96084	chr18	16967270	16968269	Intergenic	-3250	562301	akip1	A kinase (PRKA) interacting protein 1	WT to +Krt5; Hyper
1.95925	chr10	35007740	35008739	Intergenic	-6500	100006212	rfxap	regulatory factor X-associated protein	WT to +Krt5; Hyper
1.9546	chr5	37237806	37238805	Intron (NM_131005, Intron 3 of 5)	1213	30199	epd	ependymin	WT to +Krt5; Hyper
1.95331	chr10	26136307	26137365	Intron (NM_001137657, Intron 16 of 23)	-19593	393254	trim47	tripartite motif containing 47	WT to +Krt5; Hyper
1.9492	chr9	522581	523580	Intergenic	-52684	570890	si:dkey-11f4.16	si:dkey-11f4.16	WT to +Krt5; Hyper
1.94653	chr17	52892961	52893960	Intron (NM_001076722, Intron 10 of 10)	40536	767755	zgc:154061	zgc:154061	WT to +Krt5; Hyper
1.9463	chr9	46074555	46075554	Intergenic	36273	30395	twist2	twist2	WT to +Krt5; Hyper
1.9445	chr6	52118472	52119471	Intergenic	-93604	323055	ywhaba	tyrosine 3-monooxygenase/tryptophan 5-monooxygenase activation protein, beta polypeptide a	WT to +Krt5; Hyper
1.93846	chr7	41935975	41936974	Intergenic	-301235	406814	dnaja2a	DnaJ heat shock protein family (Hsp40) member A2a	WT to +Krt5; Hyper
1.93045	chr9	29402716	29403715	Intron (NM_131377, Intron 7 of 13)	107680	30650	pth2r	parathyroid hormone 2 receptor	WT to +Krt5; Hyper
1.92278	chr4	22697821	22698820	3' UTR (NM_001003444, Exon 4 of 4)	53642	445050	lhfpl3	LHFPL tetraspan subfamily member 3	WT to +Krt5; Hyper
1.92169	chr24	19592891	19593890	Intergenic	-19732	322795	csrnp1b	cysteine-serine-rich nuclear protein 1b	WT to +Krt5; Hyper
1.91636	chr10	32583770	32584769	Intergenic	-4094	565316	dgat2	diacylglycerol O-acyltransferase 2	WT to +Krt5; Hyper
1.91323	chr5	62051923	62052922	Intron (NM_001083540, Intron 4 of 5)	10796	325530	zswim7	zinc finger, SWIM-type containing 7	WT to +Krt5; Hyper
1.91256	chr9	44316835	44317834	Intron (NM_001089474, Intron 6 of 12)	170560	100037318	cerkl	ceramide kinase-like	WT to +Krt5; Hyper
1.90859	chr13	1205332	1206331	Intergenic	13845	100321084	si:ch73-52p7.1	si:ch73-52p7.1	WT to +Krt5; Hyper
1.90621	chr3	47693475	47694474	Intergenic	11231	100310761	mir2195	microRNA mir-2195	WT to +Krt5; Hyper
1.90478	chr21	43176815	43178311	Intron (NM_001089339, Intron 1 of 3)	241	334240	zcchc10	zinc finger, CCHC domain containing 10	WT to +Krt5; Hyper
1.90458	chr19	44973413	44974412	Intergenic	-479976	566831	rad21b	RAD21 cohesin complex component b	WT to +Krt5; Hyper
1.90424	chr9	19801900	19802899	Intergenic	-10138	791775	pdxka	pyridoxal (pyridoxine, vitamin B6) kinase a	WT to +Krt5; Hyper
1.90395	chr20	36665758	36666853	Intron (NM_001013521, Intron 1 of 12)	-9228	541394	enah	ENAH actin regulator	WT to +Krt5; Hyper
1.90217	chr5	49405770	49406769	Intron (NM_200418, Intron 3 of 9)	25532	393390	fam172a	family with sequence similarity 172 member A	WT to +Krt5; Hyper
1.89993	chr17	35039656	35040726	Intergenic	-108887	570669	asap2a	ArfGAP with SH3 domain, ankyrin repeat and PH domain 2a	WT to +Krt5; Hyper
1.89749	chr18	36945266	36946265	Intergenic	120157	559732	ttc9b	tetratricopeptide repeat domain 9B	WT to +Krt5; Hyper
1.8974	chr16	44469961	44470960	Intergenic	136636	100144569	dpys	dihydropyrimidinase	WT to +Krt5; Hyper
1.8962	chr5	54809192	54810191	Intergenic	81027	445297	gna14	guanine nucleotide binding protein (G protein), alpha 14	WT to +Krt5; Hyper
1.89603	chr5	48045718	48046889	Intron (NM_001001845, Intron 1 of 89)	14367	415105	adgrv1	adhesion G protein-coupled receptor V1	WT to +Krt5; Hyper
1.8952	chr21	13531938	13532937	Intergenic	33071	791173	pnpla7a	patatin-like phospholipase domain containing 7a	WT to +Krt5; Hyper
1.89413	chr21	39731160	39732159	Intron (NM_131575, Intron 1 of 11)	49727	58096	plrdgb	PITP-less RdgB-like protein	WT to +Krt5; Hyper
1.89375	chr10	33044921	33045920	Intergenic	-98663	735248	kctd7	potassium channel tetramerization domain containing 7	WT to +Krt5; Hyper
1.89253	chr20	39434126	39435660	TTS (NM_200388)	-4096	794050	ccl38.1	chemokine (C-C motif) ligand 38, duplicate 1	WT to +Krt5; Hyper
1.8917	chr12	16226793	16227792	Intergenic	-7998	393807	ppp1r3cb	protein phosphatase 1, regulatory subunit 3Cb	WT to +Krt5; Hyper
1.88764	chr5	24802825	24803824	Intergenic	-26330	567943	rorb	RAR-related orphan receptor B	WT to +Krt5; Hyper
1.88522	chr20	34726882	34727881	Intergenic	39799	447867	slc25a24	solute carrier family 25 member 24	WT to +Krt5; Hyper
1.88467	chr21	11913578	11914577	Intergenic	-3874	334529	aqp7	aquaporin 7	WT to +Krt5; Hyper
1.88332	chr8	53360524	53361523	Intergenic	-30055	322104	gnb1a	guanine nucleotide binding protein (G protein), beta polypeptide 1a	WT to +Krt5; Hyper
1.88257	chr8	14625290	14626289	Intergenic	-108709	100004382	qsox1	quiescin Q6 sulfhydryl oxidase 1	WT to +Krt5; Hyper
1.88217	chr2	30830637	30831636	Intron (NM_173270, Intron 8 of 12)	27909	286779	atp6v1h	ATPase H+ transporting V1 subunit H	WT to +Krt5; Hyper
1.88192	chr25	6392947	6393946	Intergenic	69812	100001421	snx33	sorting nexin 33	WT to +Krt5; Hyper
1.88184	chr7	24161343	24162360	Intron (NM_001100026, Intron 18 of 25)	39985	564754	nat8l	N-acetyltransferase 8-like	WT to +Krt5; Hyper
1.88142	chr2	35923663	35924662	Intron (NM_173277, Intron 1 of 27)	26019	286832	lamc1	laminin, gamma 1	WT to +Krt5; Hyper
1.88026	chr13	25409815	25410832	Intron (NM_212578, Intron 13 of 15)	8109	321119	mcmbp	minichromosome maintenance complex binding protein	WT to +Krt5; Hyper
1.87938	chr10	36695686	36696817	Intergenic	-10226	794081	ucp3	uncoupling protein 3	WT to +Krt5; Hyper
1.87213	chr16	44370037	44371036	Intergenic	36712	100144569	dpys	dihydropyrimidinase	WT to +Krt5; Hyper
1.87112	chr3	36060164	36061163	Intron (NM_199583, Intron 2 of 8)	20052	322106	csnk1da	casein kinase 1, delta a	WT to +Krt5; Hyper
1.87067	chr11	11316651	11317650	Intron (NM_001130624, Intron 1 of 31)	512	100170785	col9a1a	collagen, type IX, alpha 1a	WT to +Krt5; Hyper
1.86939	chr17	50442553	50443573	Intergenic	-41971	30612	bmp4	bone morphogenetic protein 4	WT to +Krt5; Hyper
1.86836	chr14	40672775	40673774	Intron (NM_001080567, Intron 2 of 21)	51139	558055	drp2	dystrophin related protein 2	WT to +Krt5; Hyper
1.85913	chr19	3907902	3908979	Intron (NM_001110123, Intron 9 of 11)	-16890	798034	eva1bb	eva-1 homolog Bb (C. elegans)	WT to +Krt5; Hyper
1.85878	chr17	22787721	22788720	Intron (NM_173285, Intron 8 of 19)	-19007	100033525	mir456	microRNA 456	WT to +Krt5; Hyper
1.85656	chr8	25192406	25193424	Intron (NM_001111250, Intron 4 of 8)	22031	100006888	gnai3	guanine nucleotide binding protein (G protein), alpha inhibiting activity polypeptide 3	WT to +Krt5; Hyper
1.8556	chr25	27807395	27808394	Intergenic	-21812	558801	fezf1	FEZ family zinc finger 1	WT to +Krt5; Hyper
1.8535	chr6	23304311	23305538	Intron (NM_200375, Intron 6 of 7)	86781	393346	stx8	syntaxin 8	WT to +Krt5; Hyper
1.85255	chr18	24834107	24835118	Intergenic	-98470	414272	rgma	repulsive guidance molecule BMP co-receptor a	WT to +Krt5; Hyper
1.85211	chr9	35395604	35396603	Intron (NM_131830, Intron 15 of 16)	-135560	170846	appb	amyloid beta (A4) precursor protein b	WT to +Krt5; Hyper
1.84816	chr23	15517095	15518233	Exon (NM_001003833, Exon 4 of 21)	56427	322056	sulf2b	sulfatase 2b	WT to +Krt5; Hyper
1.84549	chr3	56844881	56846101	Intergenic	-41687	550424	zgc:112148	zgc:112148	WT to +Krt5; Hyper
1.84297	chr9	50154933	50155932	Intron (NM_001128258, Intron 6 of 28)	7933	569823	ttc21b	tetratricopeptide repeat domain 21B	WT to +Krt5; Hyper
1.84286	chr15	36683711	36684710	Intergenic	185293	692352	nphs1	NPHS1 adhesion molecule, nephrin	WT to +Krt5; Hyper
1.84102	chr7	31502237	31503570	Intergenic	20775	492812	nap1l4b	nucleosome assembly protein 1-like 4b	WT to +Krt5; Hyper
1.83836	chr24	9685507	9686564	Intergenic	-54873	334102	cdv3	carnitine deficiency-associated gene expressed in ventricle 3	WT to +Krt5; Hyper
1.83804	chr12	25937746	25938745	Intron (NM_199858, Intron 6 of 8)	-6942	447846	bmpr1ab	bone morphogenetic protein receptor, type IAb	WT to +Krt5; Hyper
1.83787	chr6	22130376	22131375	Promoter-TSS (NM_001083876)	-864	100001623	cd7al	cd7 antigen-like	WT to +Krt5; Hyper
1.83732	chr5	5175936	5176935	Intergenic	-425560	767667	mvb12ba	multivesicular body subunit 12Ba	WT to +Krt5; Hyper
1.83703	chr9	13752950	13753949	Intron (NM_001319136, Intron 8 of 11)	-8940	767646	abi2a	abl-interactor 2a	WT to +Krt5; Hyper
1.83626	chr5	794902	795901	Intergenic	32486	100037361	zgc:158463	zgc:158463	WT to +Krt5; Hyper
1.83484	chr5	11305525	11306524	Intron (NM_001128707, Intron 1 of 16)	2556	561184	nf2a	neurofibromin 2a (merlin)	WT to +Krt5; Hyper
1.83431	chr5	38480701	38481700	Exon (NM_001130840, Exon 68 of 72)	-6008	447893	anxa3a	annexin A3a	WT to +Krt5; Hyper
1.83268	chr13	25098582	25099581	Intron (NM_001128681, Intron 11 of 21)	29426	266798	ap3m1	adaptor related protein complex 3 subunit mu 1	WT to +Krt5; Hyper
1.82902	chr17	33357772	33358771	Intergenic	13930	402784	dnajc27	DnaJ (Hsp40) homolog, subfamily C, member 27	WT to +Krt5; Hyper
1.8277	chr13	33089600	33090599	Intron (NM_213411, Intron 3 of 12)	6711	406720	golga5	golgin A5	WT to +Krt5; Hyper
1.8265	chr5	21559148	21560147	Intergenic	-4123	561042	shisa2a	shisa family member 2a	WT to +Krt5; Hyper
1.82632	chr7	71785314	71786392	Intergenic	19526	503763	ywhae2	tyrosine 3-monooxygenase/tryptophan 5-monooxygenase activation protein, epsilon polypeptide 2	WT to +Krt5; Hyper
1.82624	chr9	1424298	1425352	Exon (NM_001127405, Exon 6 of 23)	32872	100004342	osbpl6	oxysterol binding protein-like 6	WT to +Krt5; Hyper
1.82581	chr20	34036236	34037235	Exon (NM_001025498, Exon 6 of 7)	17275	558036	lmx1a	LIM homeobox transcription factor 1, alpha	WT to +Krt5; Hyper
1.82423	chr17	10638274	10639273	Intron (NM_001305546, Intron 2 of 2)	19078	323474	fbxo34	F-box protein 34	WT to +Krt5; Hyper
1.8238	chr25	18380468	18381529	Intron (NM_205720, Intron 1 of 6)	2369	403032	tes	testis derived transcript (3 LIM domains)	WT to +Krt5; Hyper
1.82364	chr3	5717625	5718637	Intron (NM_212977, Intron 6 of 9)	16007	406249	ddx39ab	DEAD (Asp-Glu-Ala-Asp) box polypeptide 39Ab	WT to +Krt5; Hyper
1.8233	chr21	25389106	25390105	Intergenic	-9819	80872	sms	spermine synthase	WT to +Krt5; Hyper
1.82318	chr9	53714116	53715115	Intergenic	-22234	406246	sox21b	SRY (sex determining region Y)-box 21b	WT to +Krt5; Hyper
1.82234	chr18	5294658	5295657	Intergenic	-7883	751680	glg1b	golgi glycoprotein 1b	WT to +Krt5; Hyper
1.82174	chr16	39055566	39056565	Intergenic	65390	436700	eny2	ENY2 transcription and export complex 2 subunit	WT to +Krt5; Hyper
1.82147	chr21	5281686	5282685	Intergenic	-53625	550235	psmd5	proteasome 26S subunit, non-ATPase 5	WT to +Krt5; Hyper
1.81823	chr22	14681591	14682596	Intergenic	-129676	402863	gtpbp1l	GTP binding protein 1, like	WT to +Krt5; Hyper
1.81773	chr8	35564829	35565828	Intergenic	-169119	103911540	zgc:103700	zgc:103700	WT to +Krt5; Hyper
1.81744	chr6	26568081	26569080	Exon (NM_001037680, Exon 1 of 1)	742	557661	sox14	SRY (sex determining region Y)-box 14	WT to +Krt5; Hyper
1.81505	chr6	51690296	51691295	Intergenic	-22500	503535	ripor3	RIPOR family member 3	WT to +Krt5; Hyper
1.81396	chr8	32678405	32679404	Intergenic	117078	100005569	zgc:194839	zgc:194839	WT to +Krt5; Hyper
1.81142	chr3	20573108	20574107	Intergenic	-2285	100005514	spop	speckle type BTB/POZ protein	WT to +Krt5; Hyper
1.81137	chr22	8897148	8898158	Intergenic	-545479	568759	cacna2d2b	calcium channel, voltage-dependent, alpha 2/delta subunit 2b	WT to +Krt5; Hyper
1.81107	chr5	10149289	10150288	Intergenic	296077	403306	rtn4r	reticulon 4 receptor	WT to +Krt5; Hyper
1.81077	chr19	32549497	32550496	Intergenic	-20701	447915	mrpl53	mitochondrial ribosomal protein L53	WT to +Krt5; Hyper
1.8096	chr4	1125103	1126102	Intergenic	-70902	406240	mtpn	myotrophin	WT to +Krt5; Hyper
1.80544	chr18	13292699	13293698	Intron (NM_001044968, Intron 12 of 32)	12754	561747	plcg2	phospholipase C, gamma 2	WT to +Krt5; Hyper
1.80455	chr7	5529035	5530160	Intergenic	-164237	565268	arhgef11	Rho guanine nucleotide exchange factor (GEF) 11	WT to +Krt5; Hyper
1.80098	chr1	12797222	12798430	Intergenic	-213541	572532	pcdh18a	protocadherin 18a	WT to +Krt5; Hyper
1.7977	chr23	10210245	10211244	Promoter-TSS (NM_001111167)	-828	562552	zgc:171775	zgc:171775	WT to +Krt5; Hyper
1.79388	chr9	22093255	22094254	Exon (NM_001128231, Exon 26 of 33)	60708	373865	kctd12.1	potassium channel tetramerisation domain containing 12.1	WT to +Krt5; Hyper
1.79369	chr9	22408668	22409667	Intron (NM_001102644, Intron 3 of 3)	-6800	100000175	crygm2d20	crystallin, gamma M2d20	WT to +Krt5; Hyper
1.79198	chr9	1709934	1710943	Intergenic	-8785	751729	hnrnpa3	heterogeneous nuclear ribonucleoprotein A3	WT to +Krt5; Hyper
1.7918	chr8	20167049	20168329	Intergenic	41920	335159	acsbg2	acyl-CoA synthetase bubblegum family member 2	WT to +Krt5; Hyper
1.78742	chr11	9372048	9373047	Intergenic	592323	100002610	nlgn1	neuroligin 1	WT to +Krt5; Hyper
1.78733	chr19	22850188	22851596	Intron (NM_001100032, Intron 20 of 31)	43673	567639	pleca	plectin a	WT to +Krt5; Hyper
1.78652	chr5	16631099	16632098	Intergenic	-401532	368672	atad1a	ATPase family AAA domain containing 1a	WT to +Krt5; Hyper
1.78533	chr1	51326155	51327164	Exon (NM_001366171, Exon 3 of 14)	1294	103909284	nfixa	nuclear factor I/Xa	WT to +Krt5; Hyper
1.78348	chr3	25703705	25704704	Intergenic	-14808	445192	mfsd6l	major facilitator superfamily domain containing 6-like	WT to +Krt5; Hyper
1.78284	chr17	13288548	13289547	Intergenic	199995	407733	pnn	pinin, desmosome associated protein	WT to +Krt5; Hyper
1.78168	chr18	29203624	29204623	Intergenic	-220235	114467	mafa	v-maf avian musculoaponeurotic fibrosarcoma oncogene homolog a (paralog a)	WT to +Krt5; Hyper
1.78041	chr7	49837532	49838531	Intergenic	162064	322626	hsd17b12b	hydroxysteroid (17-beta) dehydrogenase 12b	WT to +Krt5; Hyper
1.78031	chr22	14970629	14971628	Intergenic	159359	402863	gtpbp1l	GTP binding protein 1, like	WT to +Krt5; Hyper
1.77907	chr4	15296894	15297893	Intron (NM_001004495, Intron 3 of 30)	124304	325938	plxna4	plexin A4	WT to +Krt5; Hyper
1.77853	chr9	55494189	55495188	Intron (NM_200822, Intron 7 of 7)	28125	393795	gpr143	G protein-coupled receptor 143	WT to +Krt5; Hyper
1.77746	chr8	34961966	34962965	Intergenic	-30400	573060	LOC573060	E3 ubiquitin-protein ligase RBBP6-like	WT to +Krt5; Hyper
1.7767	chr8	50437715	50439139	Intergenic	55637	571967	ido1	indoleamine 2,3-dioxygenase 1	WT to +Krt5; Hyper
1.77658	chr2	33966513	33967512	TTS (NM_001114593)	23270	100136875	kif2c	kinesin family member 2C	WT to +Krt5; Hyper
1.7759	chr6	11268505	11269504	Intergenic	135296	550509	zgc:112416	zgc:112416	WT to +Krt5; Hyper
1.7755	chr13	45988082	45989081	Intergenic	-52301	406407	marcksl1a	MARCKS-like 1a	WT to +Krt5; Hyper
1.7738	chr17	12639882	12640881	Intergenic	-30087	792017	brms1la	BRMS1 like transcriptional repressor a	WT to +Krt5; Hyper
1.77371	chr5	37547165	37548164	Exon (NM_131866, Exon 9 of 19)	7188	140426	gucy2d	guanylate cyclase 2D, retinal	WT to +Krt5; Hyper
1.7734	chr19	34773272	34774711	Intron (NM_001144043, Intron 1 of 18)	49737	560267	gabbr2	gamma-aminobutyric acid (GABA) B receptor, 2	WT to +Krt5; Hyper
1.77168	chr19	18885033	18886032	Intergenic	-35082	570186	si:dkey-208k4.2	si:dkey-208k4.2	WT to +Krt5; Hyper
1.77098	chr3	51288907	51289906	Intergenic	-19626	406540	ttyh2l	tweety homolog 2, like	WT to +Krt5; Hyper
1.77095	chr8	33925190	33926189	Intron (NM_001328420, Intron 8 of 8)	151334	58140	pbx3b	pre-B-cell leukemia homeobox 3b	WT to +Krt5; Hyper
1.77091	chr19	46704206	46705261	Intron (NM_001045310, Intron 6 of 6)	37356	724005	grinaa	glutamate receptor, ionotropic, N-methyl D-aspartate-associated protein 1a (glutamate binding)	WT to +Krt5; Hyper
1.77026	chr5	21074728	21075898	Intergenic	290886	797046	sh2d1aa	SH2 domain containing 1A duplicate a	WT to +Krt5; Hyper
1.76903	chr19	4767377	4768376	Intergenic	-78097	100628953	mir30a	microRNA 30a	WT to +Krt5; Hyper
1.76524	chr23	45086623	45087622	Intergenic	66305	64269	atp1b2a	ATPase Na+/K+ transporting subunit beta 2a	WT to +Krt5; Hyper
1.7648	chr14	3756545	3757544	Intergenic	-80849	100073340	lrp2bp	LRP2 binding protein	WT to +Krt5; Hyper
1.76356	chr7	27815775	27816774	Intergenic	60845	280646	lmo1	LIM domain only 1	WT to +Krt5; Hyper
1.76318	chr21	9423820	9425153	Intron (NM_001089543, Intron 2 of 45)	45053	560883	ptpn13	protein tyrosine phosphatase non-receptor type 13	WT to +Krt5; Hyper
1.76156	chr24	19200212	19201211	Intron (NM_001089499, Intron 9 of 12)	134870	557144	zgc:162928	zgc:162928	WT to +Krt5; Hyper
1.76042	chr20	42135699	42136698	Intergenic	-40436	555399	si:dkeyp-114g9.1	si:dkeyp-114g9.1	WT to +Krt5; Hyper
1.75709	chr22	2166451	2167450	Intron (NM_001130657, Intron 1 of 6)	-15005	100142638	zgc:171435	zgc:171435	WT to +Krt5; Hyper
1.75598	chr16	16465720	16466719	Intergenic	-136336	334496	rbm12b	RNA binding motif protein 12B	WT to +Krt5; Hyper
1.75493	chr5	65321166	65322165	Exon (NM_001045415, Exon 7 of 7)	9628	751703	lcn15	lipocalin 15	WT to +Krt5; Hyper
1.75477	chr15	42869850	42870849	Intron (NM_001123284, Intron 1 of 11)	58611	567212	slc8a2b	solute carrier family 8 member 2b	WT to +Krt5; Hyper
1.7534	chr22	29555592	29556591	Intergenic	81323	266750	adra2a	adrenoceptor alpha 2A	WT to +Krt5; Hyper
1.75245	chr16	22992199	22993198	Intergenic	42144	445492	flad1	flavin adenine dinucleotide synthetase 1	WT to +Krt5; Hyper
1.75156	chr20	29276042	29277191	Intergenic	-30167	325430	katnbl1	katanin p80 subunit B-like 1	WT to +Krt5; Hyper
1.75109	chr24	27316406	27317405	Intergenic	3953	563952	ccl34b.1	chemokine (C-C motif) ligand 34b, duplicate 1	WT to +Krt5; Hyper
1.7509	chr15	37722255	37723254	Intergenic	34581	550587	lin37	lin-37 DREAM MuvB core complex component	WT to +Krt5; Hyper
1.74927	chr12	12690442	12691441	Intergenic	-389377	30208	cmn	calymmin	WT to +Krt5; Hyper
1.74907	chr10	36272833	36274572	Intergenic	2324	100151312	or109-7	odorant receptor, family D, subfamily 109, member 7	WT to +Krt5; Hyper
1.74856	chr14	22681495	22682494	Intergenic	480482	447875	smyd5	SMYD family member 5	WT to +Krt5; Hyper
1.7485	chr2	17172468	17173910	Intergenic	-4993	100136860	fam131a	family with sequence similarity 131 member A	WT to +Krt5; Hyper
1.74843	chr13	16252171	16253170	Intron (NM_001145603, Intron 1 of 31)	40736	569065	dlg5a	discs, large homolog 5a (Drosophila)	WT to +Krt5; Hyper
1.74709	chr8	48647810	48648840	Intergenic	24061	321442	nppa	natriuretic peptide A	WT to +Krt5; Hyper
1.74707	chr22	30527059	30528058	Intergenic	29766	796658	si:dkey-169i5.4	si:dkey-169i5.4	WT to +Krt5; Hyper
1.747	chr18	33137190	33138189	Intergenic	59343	574525	olfcd2	olfactory receptor C family, d2	WT to +Krt5; Hyper
1.74665	chr5	15902589	15903588	Intergenic	68303	572134	piwil2	piwi-like RNA-mediated gene silencing 2	WT to +Krt5; Hyper
1.74589	chr20	26464797	26465816	Intron (NM_152959, Intron 7 of 8)	18972	259252	esr1	estrogen receptor 1	WT to +Krt5; Hyper
1.7453	chr25	6312291	6313292	Intron (NM_199694, Intron 5 of 8)	7600	324743	snupn	snurportin 1	WT to +Krt5; Hyper
1.74498	chr17	18025156	18026162	Intron (NM_200054, Intron 6 of 12)	13596	337193	setd3	SET domain containing 3, actin histidine methyltransferase	WT to +Krt5; Hyper
1.7449	chr25	20190806	20191808	Intergenic	-20934	574005	dnajb9a	DnaJ heat shock protein family (Hsp40) member B9a	WT to +Krt5; Hyper
1.74488	chr16	4128672	4129671	Intron (NM_152981, Intron 2 of 8)	-224435	797343	yrdc	yrdC N(6)-threonylcarbamoyltransferase domain containing	WT to +Krt5; Hyper
1.74483	chr4	35614567	35615734	Intergenic	565144	100150619	LOC100150619	gastrula zinc finger protein XlCGF8.2DB-like	WT to +Krt5; Hyper
1.74439	chr19	3351516	3352515	Intergenic	-14138	100147856	illr2	immune-related, lectin-like receptor 2	WT to +Krt5; Hyper
1.74373	chr10	10866221	10867274	Intergenic	23421	394093	ambp	alpha-1-microglobulin/bikunin precursor	WT to +Krt5; Hyper
1.74336	chr5	23125248	23126247	Intergenic	4912	114405	cx27.5	connexin 27.5	WT to +Krt5; Hyper
1.74224	chr21	35191772	35192776	Intron (NM_001002718, Intron 1 of 2)	10934	436991	ubtd2	ubiquitin domain containing 2	WT to +Krt5; Hyper
1.74126	chr1	20237420	20238419	Intergenic	-2119	406662	msmo1	methylsterol monooxygenase 1	WT to +Krt5; Hyper
1.74118	chr8	23155539	23156549	Exon (NM_001002464, Exon 4 of 5)	11534	386768	dnajc5aa	DnaJ (Hsp40) homolog, subfamily C, member 5aa	WT to +Krt5; Hyper
1.74108	chr14	42130411	42131410	Intergenic	325663	562031	pcdh18b	protocadherin 18b	WT to +Krt5; Hyper
1.73984	chr6	57686050	57687091	Intergenic	-28404	767652	cbfa2t2	CBFA2/RUNX1 partner transcriptional co-repressor 2	WT to +Krt5; Hyper
1.73956	chr1	28967615	28968614	Exon (NM_200522, Exon 8 of 21)	5330	560041	zc3h13	zinc finger CCCH-type containing 13	WT to +Krt5; Hyper
1.73931	chr4	47736940	47737939	Intergenic	400549	100191016	zgc:174690	zgc:174690	WT to +Krt5; Hyper
1.73911	chr9	55602591	55603600	Intergenic	-63859	560294	tbl1x	transducin beta like 1 X-linked	WT to +Krt5; Hyper
1.73884	chr24	41403356	41404430	Promoter-TSS (NM_200379)	-44	393350	xylb	xylulokinase homolog (H. influenzae)	WT to +Krt5; Hyper
1.73871	chr13	42865790	42866789	Intron (NM_214809, Intron 13 of 68)	161011	570830	vsir	V-set immunoregulatory receptor	WT to +Krt5; Hyper
1.73761	chr14	46265696	46266724	Intergenic	-46538	791180	shisa3	shisa family member 3	WT to +Krt5; Hyper
1.73712	chr9	33030022	33031021	Exon (NM_001328534, Exon 10 of 10)	-3422	337663	mxe	myxovirus (influenza virus) resistance E	WT to +Krt5; Hyper
1.73685	chr6	28897705	28898704	Intron (NM_152248, Intron 2 of 11)	11324	260407	tp63	tumor protein p63	WT to +Krt5; Hyper
1.73623	chr1	25889590	25890589	Intergenic	-43028	323538	coro2a	coronin, actin binding protein, 2A	WT to +Krt5; Hyper
1.73614	chr6	5794076	5795075	Intergenic	297115	447816	rtn4a	reticulon 4a	WT to +Krt5; Hyper
1.7361	chr13	7364183	7365202	Intergenic	70700	558711	h2afy2	H2A histone family, member Y2	WT to +Krt5; Hyper
1.73596	chr17	49414966	49415965	Intergenic	-34151	550264	fcf1	FCF1 rRNA-processing protein	WT to +Krt5; Hyper
1.73578	chr12	43678248	43679247	Intergenic	-20482	572187	dock1	dedicator of cytokinesis 1	WT to +Krt5; Hyper
1.73558	chr7	17453858	17454857	Intron (NM_130953, Intron 2 of 9)	6276	30130	men1	multiple endocrine neoplasia I	WT to +Krt5; Hyper
1.73461	chr4	23622694	23623693	Intergenic	217049	30637	mdm2	MDM2 proto-oncogene	WT to +Krt5; Hyper
1.73359	chr3	8545015	8546014	Intergenic	85994	114450	sim2	SIM bHLH transcription factor 2	WT to +Krt5; Hyper
1.73172	chr3	55049034	55050033	Intergenic	15935	107990273	si:dkey-114l24.2	si:dkey-114l24.2	WT to +Krt5; Hyper
1.73044	chr19	32830455	32831454	Intergenic	-38900	557340	atxn1a	ataxin 1a	WT to +Krt5; Hyper
1.7304	chr18	35556187	35557581	Intron (NM_001102571, Intron 81 of 104)	-71234	322720	itpkcb	inositol-trisphosphate 3-kinase Cb	WT to +Krt5; Hyper
1.73005	chr16	44285596	44286651	Intergenic	-47701	100144569	dpys	dihydropyrimidinase	WT to +Krt5; Hyper
1.72789	chr22	35030283	35031282	Intergenic	56995	393591	armh3	armadillo like helical domain containing 3	WT to +Krt5; Hyper
1.72718	chr5	58621444	58622447	Intron (NM_001099451, Intron 1 of 20)	13061	567599	rasa4	RAS p21 protein activator 4	WT to +Krt5; Hyper
1.72685	chr8	36965265	36966588	Intron (NM_001123234, Intron 7 of 27)	14801	553406	kdm5c	lysine (K)-specific demethylase 5C	WT to +Krt5; Hyper
1.72627	chr19	23080973	23081972	Intergenic	-1667	561049	eif3eb	eukaryotic translation initiation factor 3, subunit E, b	WT to +Krt5; Hyper
1.72518	chr3	17314051	17315374	Intergenic	-72840	613239	hcrt	hypocretin (orexin) neuropeptide precursor	WT to +Krt5; Hyper
1.72477	chr12	13737613	13738612	Intergenic	-47152	57930	foxh1	forkhead box H1	WT to +Krt5; Hyper
1.7243	chr24	28813644	28814643	Promoter-TSS (NM_001083844)	-51	565402	col11a1a	collagen, type XI, alpha 1a	WT to +Krt5; Hyper
1.72413	chr7	5348685	5349684	Exon (NM_001031840, Exon 2 of 40)	16176	565268	arhgef11	Rho guanine nucleotide exchange factor (GEF) 11	WT to +Krt5; Hyper
1.7241	chr2	11557664	11558689	Intergenic	135980	378959	lhx8a	LIM homeobox 8a	WT to +Krt5; Hyper
1.7239	chr17	26851929	26852971	Intergenic	-2672	568313	si:dkey-221l4.10	si:dkey-221l4.10	WT to +Krt5; Hyper
1.72317	chr17	42781568	42782567	Intron (NM_131422, Intron 1 of 2)	1493	30697	nkx2.2a	NK2 homeobox 2a	WT to +Krt5; Hyper
1.72312	chr10	36589010	36590009	Intron (NM_001161447, Intron 3 of 46)	13861	794108	nipblb	NIPBL cohesin loading factor b	WT to +Krt5; Hyper
1.72278	chr13	25884119	25885118	Intergenic	161861	678650	bcl11aa	BAF chromatin remodeling complex subunit BCL11A a	WT to +Krt5; Hyper
1.72232	chr13	40285097	40286096	Exon (NM_131423, Exon 2 of 3)	421	30698	nkx2.3	NK2 homeobox 3	WT to +Krt5; Hyper
1.71995	chr23	40679235	40680234	Intergenic	-36549	334065	rnf146	ring finger protein 146	WT to +Krt5; Hyper
1.71946	chr3	42590623	42591622	Intergenic	-77439	393489	zfand2a	zinc finger, AN1-type domain 2A	WT to +Krt5; Hyper
1.71913	chr19	39294590	39295589	Intergenic	460150	321212	col9a2	procollagen, type IX, alpha 2	WT to +Krt5; Hyper
1.71868	chr19	45856876	45857963	Intron (NM_001177934, Intron 6 of 7)	201599	795613	trps1	trichorhinophalangeal syndrome I	WT to +Krt5; Hyper
1.71836	chr1	50259288	50260287	Intergenic	-17680	30462	otx2a	orthodenticle homeobox 2a	WT to +Krt5; Hyper
1.71801	chr4	28392761	28393760	Intergenic	7920	100331575	alg10	ALG10 alpha-1,2-mannosyltransferase	WT to +Krt5; Hyper
1.71739	chr11	37913237	37914293	Intergenic	-5820	100033656	mir135c-1	microRNA 135c-1	WT to +Krt5; Hyper
1.71707	chr10	37511763	37512762	Intergenic	-44195	100002680	msi2a	musashi RNA-binding protein 2a	WT to +Krt5; Hyper
1.71496	chr11	7583429	7584469	Intergenic	-183474	406676	adgrl4	adhesion G protein-coupled receptor L4	WT to +Krt5; Hyper
1.71349	chr23	2634682	2635786	Intergenic	-61366	792194	snai1b	snail family zinc finger 1b	WT to +Krt5; Hyper
1.71312	chr25	24560038	24561037	Intergenic	407837	541385	tmem86a	transmembrane protein 86A	WT to +Krt5; Hyper
1.71293	chr4	29095091	29096105	Intron (NM_001328702, Intron 1 of 2)	52646	571594	si:dkey-13e3.1	si:dkey-13e3.1	WT to +Krt5; Hyper
1.71273	chr6	14282634	14283796	Intergenic	-120345	792527	inpp4ab	inositol polyphosphate-4-phosphatase type I Ab	WT to +Krt5; Hyper
1.71251	chr18	28471070	28472276	Intergenic	-114727	58027	spon1a	spondin 1a	WT to +Krt5; Hyper
1.71229	chr22	18797004	18798300	Intergenic	-43725	335709	atp5f1d	ATP synthase F1 subunit delta	WT to +Krt5; Hyper
1.71182	chr14	41285112	41286111	Intron (NM_001012263, Intron 1 of 5)	25492	497135	fgfrl1b	fibroblast growth factor receptor like 1b	WT to +Krt5; Hyper
1.71175	chr16	52840132	52841131	Intron (NM_001017568, Intron 3 of 11)	7062	550230	azin1a	antizyme inhibitor 1a	WT to +Krt5; Hyper
1.71138	chr3	20224982	20226110	Intergenic	-256944	378437	selenow2a	selenoprotein W, 2a	WT to +Krt5; Hyper
1.71127	chr3	40860955	40861954	Intergenic	-26780	324340	cyp3c1	cytochrome P450, family 3, subfamily c, polypeptide 1	WT to +Krt5; Hyper
1.711	chr16	17141697	17142705	Intergenic	22262	406471	tnfrsf1a	tumor necrosis factor receptor superfamily, member 1a	WT to +Krt5; Hyper
1.71035	chr17	45458142	45459177	Intron (NM_001020490, Intron 9 of 13)	28277	403009	ezra	ezrin a	WT to +Krt5; Hyper
1.71017	chr9	17624289	17625302	Intron (NM_001128338, Intron 37 of 44)	150913	561317	vwa8	von Willebrand factor A domain containing 8	WT to +Krt5; Hyper
1.70972	chr7	69836730	69837729	Exon (NM_001302224, Exon 8 of 16)	45655	100003592	adgra3	adhesion G protein-coupled receptor A3	WT to +Krt5; Hyper
1.70966	chr25	5499439	5500438	Intron (NM_001197316, Intron 11 of 36)	114429	100333657	plxnb2b	plexin b2b	WT to +Krt5; Hyper
1.70936	chr8	2714274	2715273	Intron (NM_001039998, Intron 4 of 10)	15477	402885	sh3glb2a	SH3-domain GRB2-like endophilin B2a	WT to +Krt5; Hyper
1.70792	chr22	26899977	26900976	Intergenic	71229	567109	si:dkey-44g23.5	si:dkey-44g23.5	WT to +Krt5; Hyper
1.70764	chr23	335460	336466	Intergenic	-5662	393309	ap4b1	adaptor related protein complex 4 subunit beta 1	WT to +Krt5; Hyper
1.70746	chr17	44136132	44137131	Promoter-TSS (NM_131251)	-858	30501	otx2b	orthodenticle homeobox 2b	WT to +Krt5; Hyper
1.70692	chr18	44994349	44995348	Intergenic	-53184	573990	pex16	peroxisomal biogenesis factor 16	WT to +Krt5; Hyper
1.70661	chr4	63611436	63612435	Intergenic	-817181	503712	zgc:113135	zgc:113135	WT to +Krt5; Hyper
1.70647	chr5	67635008	67636007	Intergenic	46551	100149404	tnfsf13	TNF superfamily member 13	WT to +Krt5; Hyper
1.70625	chr18	25937928	25939054	Intergenic	-69760	572261	sema4ba	sema domain, immunoglobulin domain (Ig), transmembrane domain (TM) and short cytoplasmic domain, (semaphorin) 4Ba	WT to +Krt5; Hyper
1.7061	chr2	37664744	37665743	Intergenic	-14804	245699	insra	insulin receptor a	WT to +Krt5; Hyper
1.70599	chr19	29627027	29628495	Intergenic	79473	791146	e2f3	E2F transcription factor 3	WT to +Krt5; Hyper
1.70594	chr3	31345738	31346737	Intergenic	-122653	393631	ccdc43	coiled-coil domain containing 43	WT to +Krt5; Hyper
1.70476	chr5	7849277	7850880	TTS (NM_001128232)	51476	553375	spef2	sperm flagellar 2	WT to +Krt5; Hyper
1.7043	chr6	2526840	2527839	Intergenic	-25264	393305	hyi	hydroxypyruvate isomerase	WT to +Krt5; Hyper
1.70182	chr23	44234368	44235367	Intron (NM_213374, Intron 4 of 11)	9136	406683	zgc:56304	zgc:56304	WT to +Krt5; Hyper
1.70168	chr6	9152005	9153004	Exon (NM_001327989, Exon 30 of 48)	-33258	678652	kalrnb	kalirin RhoGEF kinase b	WT to +Krt5; Hyper
1.70138	chr1	29673287	29674286	Intergenic	-20655	557028	igf2bp2b	insulin-like growth factor 2 mRNA binding protein 2b	WT to +Krt5; Hyper
1.70063	chr5	28319304	28320303	Exon (NM_001326382, Exon 14 of 15)	50103	556540	niban2b	niban apoptosis regulator 2b	WT to +Krt5; Hyper
1.70055	chr3	9399542	9400610	Intergenic	-77864	798482	gpr139	G protein-coupled receptor 139	WT to +Krt5; Hyper
1.70053	chr13	41782127	41783373	Intergenic	8309	393577	cisd1	CDGSH iron sulfur domain 1	WT to +Krt5; Hyper
1.69975	chr5	55196483	55197482	Intron (NM_001308831, Intron 22 of 22)	-18840	550270	camk4	calcium/calmodulin-dependent protein kinase IV	WT to +Krt5; Hyper
1.6993	chr13	25918815	25919826	Intergenic	196563	678650	bcl11aa	BAF chromatin remodeling complex subunit BCL11A a	WT to +Krt5; Hyper
1.69866	chr5	19227983	19228982	Intron (NM_001126454, Intron 1 of 1)	20271	793922	fam222a	family with sequence similarity 222 member A	WT to +Krt5; Hyper
1.69852	chr13	43495374	43496373	Intron (NM_001089566, Intron 3 of 10)	7676	100038786	fam160b1	family with sequence similarity 160 member B1	WT to +Krt5; Hyper
1.69738	chr4	61162872	61163871	Intergenic	465609	641487	zgc:123060	zgc:123060	WT to +Krt5; Hyper
1.69717	chr11	12737117	12738131	Intron (NM_001044311, Intron 5 of 8)	6840	324984	txlng	taxilin gamma	WT to +Krt5; Hyper
1.69706	chr21	24956008	24957007	Intron (NM_001082863, Intron 1 of 8)	8147	569217	jam3b	junctional adhesion molecule 3b	WT to +Krt5; Hyper
1.69705	chr12	48159276	48160275	Intron (NM_200733, Intron 4 of 10)	13334	393706	ppa1a	pyrophosphatase (inorganic) 1a	WT to +Krt5; Hyper
1.69688	chr13	22602053	22603082	Exon (NM_001001840, Exon 23 of 24)	15651	415100	nfkb2	nuclear factor of kappa light polypeptide gene enhancer in B-cells 2 (p49/p100)	WT to +Krt5; Hyper
1.69678	chr24	30991106	30992105	Intergenic	-66639	541437	ptbp2a	polypyrimidine tract binding protein 2a	WT to +Krt5; Hyper
1.69644	chr15	41396975	41397974	Intergenic	-43575	569700	usp16	ubiquitin specific peptidase 16	WT to +Krt5; Hyper
1.69629	chr11	29992838	29993863	Intergenic	-3868	445044	rs1a	retinoschisin 1a	WT to +Krt5; Hyper
1.69582	chr7	69734999	69736164	Intergenic	71107	553407	sec24d	SEC24 homolog D, COPII coat complex component	WT to +Krt5; Hyper
1.69536	chr7	33300421	33301483	Intergenic	111661	100007463	tle3b	TLE family member 3, transcriptional corepressor b	WT to +Krt5; Hyper
1.69486	chr15	29394214	29395269	Intergenic	20578	325958	tsku	tsukushi small leucine rich proteoglycan homolog (Xenopus laevis)	WT to +Krt5; Hyper
1.69454	chr6	15827242	15828241	Intergenic	-76505	245948	gbx2	gastrulation brain homeobox 2	WT to +Krt5; Hyper
1.69442	chr19	13382019	13383018	Intergenic	-14246	568464	zfpm2b	zinc finger protein, FOG family member 2b	WT to +Krt5; Hyper
1.69397	chr18	4011179	4012178	Intergenic	536362	336797	serp1	stress-associated endoplasmic reticulum protein 1	WT to +Krt5; Hyper
1.69376	chr3	54715422	54716421	Intron (NM_001002228, Intron 1 of 17)	22394	798402	rhbdf1a	rhomboid 5 homolog 1a (Drosophila)	WT to +Krt5; Hyper
1.69356	chr17	48463657	48464656	Intergenic	159208	570159	kcnk5a	potassium channel, subfamily K, member 5a	WT to +Krt5; Hyper
1.69324	chr16	5055028	5056027	Intergenic	-48598	792712	tpbgb	trophoblast glycoprotein b	WT to +Krt5; Hyper
1.69292	chr14	30621499	30622498	TTS (NM_001123050)	4972	100144554	il2rgb	interleukin 2 receptor, gamma b	WT to +Krt5; Hyper
1.69257	chr14	26801103	26802124	Intergenic	297723	559349	klhl4	kelch-like family member 4	WT to +Krt5; Hyper
1.69212	chr15	26066535	26067534	Intron (NM_001017861, Intron 3 of 10)	86751	550559	dph1	diphthamide biosynthesis 1	WT to +Krt5; Hyper
1.69012	chr25	25735266	25736265	Intergenic	64742	393926	idh3a	isocitrate dehydrogenase (NAD(+)) 3 alpha	WT to +Krt5; Hyper
1.68946	chr12	24679318	24680317	Intron (NM_001017555, Intron 4 of 5)	31261	550127	foxn2b	forkhead box N2b	WT to +Krt5; Hyper
1.6893	chr5	71055680	71056679	Intergenic	28145	30455	lhx3	LIM homeobox 3	WT to +Krt5; Hyper
1.68875	chr10	41006592	41007591	Intron (NM_001039812, Intron 1 of 19)	11026	559877	bmp1b	bone morphogenetic protein 1b	WT to +Krt5; Hyper
1.68846	chr14	2216522	2217521	Intron (NM_001009585, Intron 3 of 3)	28082	493587	pcdh2ac	protocadherin 2 alpha c	WT to +Krt5; Hyper
1.68792	chr1	37616740	37617739	Intergenic	25043	678549	fbxo8	F-box protein 8	WT to +Krt5; Hyper
1.68763	chr17	19108690	19109689	Intergenic	216470	30212	gsc	goosecoid	WT to +Krt5; Hyper
1.68734	chr14	48172954	48173977	Intron (NM_001031842, Intron 4 of 15)	154079	566192	fstl5	follistatin-like 5	WT to +Krt5; Hyper
1.68599	chr21	42631347	42632346	Intergenic	240523	394108	stk10	serine/threonine kinase 10	WT to +Krt5; Hyper
1.685	chr12	1501863	1502872	Intergenic	38046	692275	usp22	ubiquitin specific peptidase 22	WT to +Krt5; Hyper
1.68489	chr11	23889562	23890561	Intergenic	64251	562381	sox12	SRY (sex determining region Y)-box 12	WT to +Krt5; Hyper
1.68418	chr3	25784210	25785977	Intron (NM_001351652, Intron 6 of 14)	8375	553244	tom1	target of myb1 membrane trafficking protein	WT to +Krt5; Hyper
1.68334	chr5	16524893	16525892	Intergenic	-295326	368672	atad1a	ATPase family AAA domain containing 1a	WT to +Krt5; Hyper
1.68324	chr3	32847975	32848985	Intergenic	-6666	664751	casp6b.2	caspase 6b.2, apoptosis-related cysteine peptidase	WT to +Krt5; Hyper
1.68318	chr6	49022419	49023668	Intergenic	-7178	100534752	slc16a1a	solute carrier family 16 member 1a	WT to +Krt5; Hyper
1.6819	chr16	29990561	29991560	Intergenic	-205945	556743	sema6e	sema domain, transmembrane domain (TM), and cytoplasmic domain, (semaphorin) 6E	WT to +Krt5; Hyper
1.68088	chr5	14739918	14740917	Intron (NM_001013508, Intron 5 of 6)	37213	368206	tbx1	T-box 1	WT to +Krt5; Hyper
1.68043	chr25	29554284	29555283	Intergenic	-133255	321676	api5	apoptosis inhibitor 5	WT to +Krt5; Hyper
1.67992	chr3	11143549	11144548	Intron (NM_213297, Intron 1 of 2)	9003	406588	sstr5	somatostatin receptor 5	WT to +Krt5; Hyper
1.67985	chr25	9011400	9012399	Intergenic	-75004	30658	rag2	recombination activating gene 2	WT to +Krt5; Hyper
1.67972	chr19	40212244	40213243	Intergenic	-226182	406564	sfpq	splicing factor proline/glutamine-rich	WT to +Krt5; Hyper
1.6797	chr15	29531213	29532212	Intergenic	-77122	30449	serpinh1b	serpin peptidase inhibitor, clade H (heat shock protein 47), member 1b	WT to +Krt5; Hyper
1.67957	chr20	36788494	36789493	Intergenic	-12650	322251	rpl7l1	ribosomal protein L7-like 1	WT to +Krt5; Hyper
1.67885	chr9	43674497	43675508	Intron (NM_212793, Intron 1 of 8)	61539	368405	znf385b	zinc finger protein 385B	WT to +Krt5; Hyper
1.67859	chr9	30316373	30317372	Intron (NM_001328573, Intron 7 of 7)	15195	336466	tfg	trafficking from ER to golgi regulator	WT to +Krt5; Hyper
1.67736	chr11	3356586	3357585	Exon (NM_001083015, Exon 6 of 27)	-43972	406557	mcrs1	microspherule protein 1	WT to +Krt5; Hyper
1.67714	chr9	5654342	5655341	Intergenic	-152253	561333	abhd13	abhydrolase domain containing 13	WT to +Krt5; Hyper
1.67658	chr4	15130177	15131176	Intergenic	-25735	64604	nrf1	nuclear respiratory factor 1	WT to +Krt5; Hyper
1.67612	chr24	7327120	7328119	Intergenic	-35010	100038776	actr3b	actin related protein 3B	WT to +Krt5; Hyper
1.67556	chr12	2318815	2319814	Intergenic	168456	65236	mapk8b	mitogen-activated protein kinase 8b	WT to +Krt5; Hyper
1.6754	chr9	15070616	15071905	Intergenic	382223	100005469	fn1a	fibronectin 1a	WT to +Krt5; Hyper
1.67536	chr7	49275525	49276607	Intergenic	102360	553656	hrasb	HRas proto-oncogene, GTPase b	WT to +Krt5; Hyper
1.67535	chr16	24567914	24568913	Intron (NM_001007428, Intron 1 of 7)	34594	492787	cadm4	cell adhesion molecule 4	WT to +Krt5; Hyper
1.67512	chr20	40031596	40032609	Intron (NM_001351706, Intron 3 of 6)	-145701	567287	rnf217	ring finger protein 217	WT to +Krt5; Hyper
1.67499	chr22	29864808	29865807	Intergenic	92262	324475	smc3	structural maintenance of chromosomes 3	WT to +Krt5; Hyper
1.67489	chr3	28651575	28652574	Intergenic	-32420	664746	gsg1l	gsg1-like	WT to +Krt5; Hyper
1.67452	chr13	3407668	3408768	Intergenic	-25016	550328	prkn	parkin RBR E3 ubiquitin protein ligase	WT to +Krt5; Hyper
1.6738	chr17	12418839	12419920	Intergenic	-75349	751598	emilin1b	elastin microfibril interfacer 1b	WT to +Krt5; Hyper
1.67342	chr7	60643202	60644201	Intergenic	-117856	58068	pcxb	pyruvate carboxylase b	WT to +Krt5; Hyper
1.67263	chr20	28611543	28612542	Exon (NM_001035263, Exon 14 of 17)	80263	562738	dpf3	D4, zinc and double PHD fingers, family 3	WT to +Krt5; Hyper
1.6725	chr9	6360957	6361956	Intron (NM_173242, Intron 11 of 14)	41212	791762	ecrg4a	ECRG4 augurin precursor a	WT to +Krt5; Hyper
1.67236	chr16	33287067	33288066	Intergenic	77738	573492	rragca	Ras-related GTP binding Ca	WT to +Krt5; Hyper
1.67191	chr15	27273712	27275211	Intron (NM_200622, Intron 22 of 24)	-157061	30253	tbx2b	T-box 2b	WT to +Krt5; Hyper
1.6718	chr24	10416044	10417043	Intergenic	143421	30686	myca	MYC proto-oncogene, bHLH transcription factor a	WT to +Krt5; Hyper
1.67164	chr1	25269187	25270186	Intergenic	-23867	393828	myoz2b	myozenin 2b	WT to +Krt5; Hyper
1.67108	chr19	8728060	8729059	TTS (NM_001045100)	34645	566205	snx27a	sorting nexin 27a	WT to +Krt5; Hyper
1.67006	chr5	14199613	14200723	Intergenic	-116156	561895	sema4c	sema domain, immunoglobulin domain (Ig), transmembrane domain (TM) and short cytoplasmic domain, (semaphorin) 4C	WT to +Krt5; Hyper
1.66961	chr13	16893325	16894324	Intron (NM_001020701, Intron 5 of 6)	439546	553730	lrmda	leucine rich melanocyte differentiation associated	WT to +Krt5; Hyper
1.66938	chr5	49598518	49599517	Intergenic	-167216	393390	fam172a	family with sequence similarity 172 member A	WT to +Krt5; Hyper
1.66902	chr24	32258621	32259620	Promoter-TSS (NM_001018143)	-25	449878	trdmt1	tRNA aspartic acid methyltransferase 1	WT to +Krt5; Hyper
1.66888	chr2	8257838	8258837	Intergenic	-38757	30313	ephb3a	eph receptor B3a	WT to +Krt5; Hyper
1.6685	chr23	22914218	22915217	Intergenic	184723	334116	eno1a	enolase 1a, (alpha)	WT to +Krt5; Hyper
1.66747	chr11	40867734	40868809	Intergenic	20664	449674	park7	parkinson protein 7	WT to +Krt5; Hyper
1.66632	chr19	9251997	9252996	Intergenic	-2813	560648	si:ch211-81a5.8	si:ch211-81a5.8	WT to +Krt5; Hyper
1.66618	chr7	56388438	56389437	Intergenic	-12903	322506	nqo1	NAD(P)H dehydrogenase, quinone 1	WT to +Krt5; Hyper
1.66558	chr1	8222575	8223802	Intergenic	56185	100007521	socs1b	suppressor of cytokine signaling 1b	WT to +Krt5; Hyper
1.66416	chr8	13259383	13260382	Intron (NM_001328106, Intron 2 of 9)	21070	570401	kcnn1b	potassium intermediate/small conductance calcium-activated channel, subfamily N, member 1b	WT to +Krt5; Hyper
1.66369	chr3	31684428	31685520	Intergenic	-12207	30646	gfap	glial fibrillary acidic protein	WT to +Krt5; Hyper
1.6634	chr23	35496963	35497962	Intergenic	52687	449559	tmem18	transmembrane protein 18	WT to +Krt5; Hyper
1.66129	chr7	6898034	6899036	TTS (NM_205544)	83669	323320	actn3b	actinin alpha 3b	WT to +Krt5; Hyper
1.66041	chr16	16846266	16847281	Intergenic	-52970	794635	c4b	complement 4B (Chido blood group)	WT to +Krt5; Hyper
1.66013	chr14	33175843	33176842	3' UTR (NM_199667, Exon 2 of 2)	4401	324052	c1galt1c1	C1GALT1-specific chaperone 1	WT to +Krt5; Hyper
1.66008	chr10	31185940	31187336	Intron (NM_153654, Intron 2 of 10)	102766	386959	pknox2	pbx/knotted 1 homeobox 2	WT to +Krt5; Hyper
1.66006	chr8	669907	671314	Intergenic	113667	550562	spinb	spindlin b	WT to +Krt5; Hyper
1.65977	chr13	22349506	22350556	Promoter-TSS (NM_201505)	-49	794339	ldb3a	LIM domain binding 3a	WT to +Krt5; Hyper
1.65966	chr6	16692323	16693322	Intergenic	-326287	573095	psmb3	proteasome subunit beta 3	WT to +Krt5; Hyper
1.65939	chr8	44247075	44248090	Intergenic	-2375	368200	piwil1	piwi-like RNA-mediated gene silencing 1	WT to +Krt5; Hyper
1.65901	chr19	7554747	7555793	Exon (NM_001100011, Exon 8 of 10)	20199	563470	mindy1	MINDY lysine 48 deubiquitinase 1	WT to +Krt5; Hyper
1.65892	chr5	2725633	2726644	Intergenic	-64444	436782	supt4h1	SPT4 homolog, DSIF elongation factor subunit	WT to +Krt5; Hyper
1.65875	chr24	13835206	13836526	Intron (NM_131193, Intron 11 of 18)	55156	30436	eya1	EYA transcriptional coactivator and phosphatase 1	WT to +Krt5; Hyper
1.65865	chr10	36982877	36984151	Intergenic	-119230	492491	dhrs13a.1	dehydrogenase/reductase (SDR family) member 13a, tandem duplicate 1	WT to +Krt5; Hyper
1.65821	chr7	14708656	14709655	Intergenic	294999	393772	si:dkey-172h23.2	si:dkey-172h23.2	WT to +Krt5; Hyper
1.65809	chr12	20958059	20959058	Intergenic	-218906	641327	ca10a	carbonic anhydrase Xa	WT to +Krt5; Hyper
1.65783	chr4	582878	584785	Intergenic	-15084	554221	pthlha	parathyroid hormone-like hormone a	WT to +Krt5; Hyper
1.65718	chr17	37717963	37718962	Intergenic	20414	767735	tmem229b	transmembrane protein 229B	WT to +Krt5; Hyper
1.65646	chr2	6161709	6162753	Exon (NM_201508, Exon 6 of 12)	6742	399481	aldh9a1b	aldehyde dehydrogenase 9 family, member A1b	WT to +Krt5; Hyper
1.65642	chr19	9172163	9173162	Promoter-TSS (NM_001044874)	-90	558774	si:ch211-81a5.5	si:ch211-81a5.5	WT to +Krt5; Hyper
1.65631	chr22	14202721	14203720	Intergenic	110906	325226	bzw1a	basic leucine zipper and W2 domains 1a	WT to +Krt5; Hyper
1.65574	chr14	6964181	6965180	Intergenic	103928	323003	trappc11	trafficking protein particle complex 11	WT to +Krt5; Hyper
1.65571	chr19	38544960	38545959	Intergenic	274639	437006	nxph1	neurexophilin 1	WT to +Krt5; Hyper
1.65553	chr25	6451417	6452416	Intergenic	128282	100001421	snx33	sorting nexin 33	WT to +Krt5; Hyper
1.6555	chr23	847672	848795	Intergenic	55237	406659	rhoac	ras homolog gene family, member Ac	WT to +Krt5; Hyper
1.65486	chr5	33076652	33077651	Intergenic	65345	558156	ttll11	tubulin tyrosine ligase-like family, member 11	WT to +Krt5; Hyper
1.65462	chr21	14195702	14197062	Intergenic	399008	402830	ehmt1b	euchromatic histone-lysine N-methyltransferase 1b	WT to +Krt5; Hyper
1.65457	chr8	2635263	2636326	Intergenic	51953	562755	naif1	nuclear apoptosis inducing factor 1	WT to +Krt5; Hyper
1.65302	chr19	35615337	35616336	Intergenic	158588	553660	ndufs5	NADH:ubiquinone oxidoreductase subunit S5	WT to +Krt5; Hyper
1.65286	chr16	17507234	17508317	Intergenic	-70375	564246	zyx	zyxin	WT to +Krt5; Hyper
1.65239	chr23	25261572	25262584	Intergenic	-43792	544664	erbb3b	erb-b2 receptor tyrosine kinase 3b	WT to +Krt5; Hyper
1.65174	chr7	68357046	68358045	Intergenic	-128332	100333211	zfhx3	zinc finger homeobox 3	WT to +Krt5; Hyper
1.65133	chr7	39635028	39636100	Intergenic	-155052	559037	grpel1	GrpE-like 1, mitochondrial	WT to +Krt5; Hyper
1.65126	chr13	28425268	28426267	Exon (NM_131521, Exon 7 of 9)	-24177	555492	wbp1la	WW domain binding protein 1-like a	WT to +Krt5; Hyper
1.6509	chr4	60854214	60855213	Intergenic	-545294	100126112	zgc:173714	zgc:173714	WT to +Krt5; Hyper
1.65085	chr19	35366724	35367723	Intron (NM_001166230, Intron 2 of 4)	4143	560713	ccn4a	cellular communication network factor 4a	WT to +Krt5; Hyper
1.65077	chr5	7876411	7877410	Intron (NM_001128232, Intron 19 of 35)	24644	553375	spef2	sperm flagellar 2	WT to +Krt5; Hyper
1.65068	chr2	1547098	1548097	Intron (NM_001366848, Intron 16 of 18)	-48994	393712	exosc4	exosome component 4	WT to +Krt5; Hyper
1.65052	chr25	2418421	2419420	Intergenic	-96566	768303	bbs4	Bardet-Biedl syndrome 4	WT to +Krt5; Hyper
1.64948	chr4	26009775	26010774	Intron (NM_001100054, Intron 2 of 10)	36298	393227	usp44	ubiquitin specific peptidase 44	WT to +Krt5; Hyper
1.64909	chr5	31658066	31659065	Intergenic	34247	799300	myhz1.2	myosin, heavy polypeptide 1.2, skeletal muscle	WT to +Krt5; Hyper
1.64884	chr8	36780686	36781709	Intergenic	-169928	553406	kdm5c	lysine (K)-specific demethylase 5C	WT to +Krt5; Hyper
1.64853	chr21	9991294	9992293	Intergenic	-93024	767774	esm1	endothelial cell-specific molecule 1	WT to +Krt5; Hyper
1.64849	chr15	20513804	20514803	Intergenic	18267	30120	dlc	deltaC	WT to +Krt5; Hyper
1.64822	chr14	13813546	13814545	Intergenic	119828	325358	rraga	Ras-related GTP binding A	WT to +Krt5; Hyper
1.64701	chr21	9902024	9903068	Intergenic	-3777	767774	esm1	endothelial cell-specific molecule 1	WT to +Krt5; Hyper
1.64629	chr16	48031153	48032152	Intergenic	426980	445306	eif3ha	eukaryotic translation initiation factor 3, subunit H, a	WT to +Krt5; Hyper
1.64572	chr20	3838817	3839870	Intergenic	-35128	799070	zgc:194224	zgc:194224	WT to +Krt5; Hyper
1.64568	chr3	36375824	36376823	Intergenic	-36195	449936	ppl	periplakin	WT to +Krt5; Hyper
1.6454	chr7	41970865	41971881	Intergenic	-336134	406814	dnaja2a	DnaJ heat shock protein family (Hsp40) member A2a	WT to +Krt5; Hyper
1.64517	chr1	51740406	51741405	Intergenic	55556	798684	zgc:194101	zgc:194101	WT to +Krt5; Hyper
1.64506	chr18	16404736	16405910	Intergenic	147583	565176	alx1	ALX homeobox 1	WT to +Krt5; Hyper
1.6441	chr12	24546308	24547383	Intergenic	-70902	195820	fshr	follicle stimulating hormone receptor	WT to +Krt5; Hyper
1.64386	chr21	3224345	3225344	Intergenic	76554	326282	smad7	SMAD family member 7	WT to +Krt5; Hyper
1.64367	chr18	34868783	34869782	Intergenic	245991	563506	tiparp	TCDD-inducible poly(ADP-ribose) polymerase	WT to +Krt5; Hyper
1.64364	chr21	32859529	32860851	Intergenic	73273	266755	adra2db	adrenergic, alpha-2D-, receptor b	WT to +Krt5; Hyper
1.64316	chr10	11836859	11837858	Intron (NM_001076644, Intron 11 of 11)	27805	100000660	ppwd1	peptidylprolyl isomerase domain and WD repeat containing 1	WT to +Krt5; Hyper
1.64258	chr23	5447007	5448006	Intergenic	47827	100033537	mirlet7a-5	microRNA let7a-5	WT to +Krt5; Hyper
1.6425	chr6	51108767	51109766	Intergenic	-377736	560242	pigu	phosphatidylinositol glycan anchor biosynthesis, class U	WT to +Krt5; Hyper
1.64247	chr6	26407643	26408642	Intergenic	84239	553313	dzip1l	DAZ interacting zinc finger protein 1-like	WT to +Krt5; Hyper
1.64241	chr3	17084168	17085167	Intron (NM_194387, Intron 2 of 20)	105191	369197	stat5a	signal transducer and activator of transcription 5a	WT to +Krt5; Hyper
1.6413	chr14	24579192	24580191	Intergenic	-115803	80354	slit3	slit homolog 3 (Drosophila)	WT to +Krt5; Hyper
1.64095	chr17	48554293	48555292	Intergenic	68572	570159	kcnk5a	potassium channel, subfamily K, member 5a	WT to +Krt5; Hyper
1.64092	chr18	10103530	10104551	Intergenic	225298	566572	lrrc4.2	leucine rich repeat containing 4.2	WT to +Krt5; Hyper
1.64026	chr19	8473013	8474065	Intergenic	-89338	393569	efna1a	ephrin-A1a	WT to +Krt5; Hyper
1.64015	chr4	14396151	14397150	Intergenic	49458	100170803	si:dkey-261e22.4	si:dkey-261e22.4	WT to +Krt5; Hyper
1.6398	chr4	72583989	72585013	Intergenic	43208	323052	zgc:165515	zgc:165515	WT to +Krt5; Hyper
1.63918	chr17	32093869	32094868	Intergenic	-291533	406584	abraxas2	abraxas 2, BRISC complex subunit	WT to +Krt5; Hyper
1.63897	chr11	19688562	19689561	Intergenic	-76221	324211	namptb	nicotinamide phosphoribosyltransferase b	WT to +Krt5; Hyper
1.63893	chr23	30932430	30933429	Exon (NM_001012252, Exon 1 of 3)	374	497072	zgc:198371	zgc:198371	WT to +Krt5; Hyper
1.63888	chr17	52170580	52171579	Intergenic	-42639	407693	esrrb	estrogen-related receptor beta	WT to +Krt5; Hyper
1.63852	chr10	34876316	34877781	Intergenic	-48697	558997	dclk1a	doublecortin-like kinase 1a	WT to +Krt5; Hyper
1.638	chr1	25266066	25267065	Intergenic	-20746	393828	myoz2b	myozenin 2b	WT to +Krt5; Hyper
1.63796	chr4	59768823	59769872	Intergenic	116166	100141492	znf1077	zinc finger protein 1077	WT to +Krt5; Hyper
1.63793	chr3	16251107	16252453	Intron (NM_200508, Intron 15 of 27)	12055	393480	eftud2	elongation factor Tu GTP binding domain containing 2	WT to +Krt5; Hyper
1.63789	chr24	25679089	25680088	Intergenic	-35788	393412	klhl24b	kelch-like family member 24b	WT to +Krt5; Hyper
1.63728	chr16	47665836	47666835	Intergenic	172686	503758	slc25a32b	solute carrier family 25 member 32b	WT to +Krt5; Hyper
1.63708	chr15	7928100	7929363	Intron (NM_001113555, Intron 1 of 9)	192845	571698	cadm2b	cell adhesion molecule 2b	WT to +Krt5; Hyper
1.63707	chr16	3788216	3789215	Intergenic	-30384	195821	mtf1	metal-regulatory transcription factor 1	WT to +Krt5; Hyper
1.6369	chr15	42383010	42384330	Intergenic	-56223	493608	farsb	phenylalanyl-tRNA synthetase subunit beta	WT to +Krt5; Hyper
1.63656	chr7	37892302	37893353	Intergenic	-29246	449801	zgc:103601	zgc:103601	WT to +Krt5; Hyper
1.63641	chr10	36680885	36681884	Intergenic	-25093	794081	ucp3	uncoupling protein 3	WT to +Krt5; Hyper
1.6364	chr9	7876296	7877295	Intergenic	131034	406205	mnx2a	motor neuron and pancreas homeobox 2a	WT to +Krt5; Hyper
1.63639	chr18	39419409	39420408	Intergenic	-15588	445113	lysmd2	LysM, putative peptidoglycan-binding, domain containing 2	WT to +Krt5; Hyper
1.63595	chr5	26596671	26597670	Intergenic	-207623	373093	hdr	hematopoietic death receptor	WT to +Krt5; Hyper
1.63594	chr1	8372831	8373830	Intron (NM_201029, Intron 16 of 16)	52710	100006675	prkcba	protein kinase C, beta a	WT to +Krt5; Hyper
1.63568	chr7	60316162	60317161	Intron (NM_131550, Intron 10 of 20)	209184	58068	pcxb	pyruvate carboxylase b	WT to +Krt5; Hyper
1.63561	chr23	7762513	7763569	Intron (NM_205718, Intron 3 of 6)	5010	403029	pofut1	protein O-fucosyltransferase 1	WT to +Krt5; Hyper
1.63555	chr2	51501719	51502718	Intergenic	-12780	105665605	pigrl4.2	polymeric immunoglobulin receptor-like 4.2	WT to +Krt5; Hyper
1.63552	chr17	16603749	16604844	Intron (NM_001045263, Intron 1 of 5)	47044	692291	foxn3	forkhead box N3	WT to +Krt5; Hyper
1.63551	chr2	13634172	13635500	Intergenic	-49058	393880	vps4b	vacuolar protein sorting 4 homolog B	WT to +Krt5; Hyper
1.63502	chr24	28361386	28362385	Intergenic	-3216	393567	fbxo45	F-box protein 45	WT to +Krt5; Hyper
1.6349	chr16	48608991	48609990	Intron (NM_001012368, Intron 2 of 10)	-64712	58136	pbx2	pre-B-cell leukemia homeobox 2	WT to +Krt5; Hyper
1.63488	chr8	30450603	30451800	Intron (NM_001126396, Intron 1 of 10)	4272	560297	pgm5	phosphoglucomutase 5	WT to +Krt5; Hyper
1.63483	chr7	30020457	30021494	Intergenic	9763	100003720	polr2m	RNA polymerase II subunit M	WT to +Krt5; Hyper
1.63461	chr13	25260637	25261636	Intergenic	-5366	492500	gsto2	glutathione S-transferase omega 2	WT to +Krt5; Hyper
1.63397	chr19	38337743	38338742	Intron (NM_001002733, Intron 1 of 1)	67422	437006	nxph1	neurexophilin 1	WT to +Krt5; Hyper
1.63366	chr2	6029787	6030990	Promoter-TSS (NM_001114458)	80	797385	tmem125b	transmembrane protein 125b	WT to +Krt5; Hyper
1.63335	chr15	14190559	14191558	Intergenic	17363	334289	clca1	chloride channel accessory 1	WT to +Krt5; Hyper
1.63326	chr22	3032902	3033901	Intergenic	89201	449553	impact	impact RWD domain protein	WT to +Krt5; Hyper
1.63297	chr19	6549851	6550850	Intergenic	-83840	64610	atp1a3a	ATPase Na+/K+ transporting subunit alpha 3a	WT to +Krt5; Hyper
1.63269	chr6	53796316	53797315	Intron (NM_001013503, Intron 2 of 14)	84185	541376	cacna2d2a	calcium channel, voltage-dependent, alpha 2/delta subunit 2a	WT to +Krt5; Hyper
1.63268	chr1	18230481	18231480	Intergenic	-41833	561940	limch1a	LIM and calponin homology domains 1a	WT to +Krt5; Hyper
1.63247	chr12	23542630	23543687	Intergenic	-148154	30112	svila	supervillin a	WT to +Krt5; Hyper
1.6323	chr14	30668237	30669622	Intron (NM_001112675, Intron 5 of 7)	-26765	474323	rap2c	RAP2C, member of RAS oncogene family	WT to +Krt5; Hyper
1.62994	chr9	6987384	6988383	Intron (NM_001114095, Intron 11 of 11)	25099	562904	slc9a2	solute carrier family 9 member 2	WT to +Krt5; Hyper
1.62941	chr23	838019	839018	Intergenic	64952	406659	rhoac	ras homolog gene family, member Ac	WT to +Krt5; Hyper
1.62867	chr5	45525772	45526807	Intron (NM_001128340, Intron 5 of 37)	48502	563030	iqgap2	IQ motif containing GTPase activating protein 2	WT to +Krt5; Hyper
1.62856	chr17	33372987	33373986	Intergenic	29145	402784	dnajc27	DnaJ (Hsp40) homolog, subfamily C, member 27	WT to +Krt5; Hyper
1.62838	chr22	35089556	35090569	Intergenic	-2246	563864	si:ch73-173h19.3	si:ch73-173h19.3	WT to +Krt5; Hyper
1.62798	chr15	25796453	25797590	Intergenic	51242	436585	hic1	hypermethylated in cancer 1	WT to +Krt5; Hyper
1.62778	chr24	28852301	28853301	Intergenic	-3276	565672	rnpc3	RNA-binding region (RNP1, RRM) containing 3	WT to +Krt5; Hyper
1.62743	chr20	48559264	48560263	Intergenic	37933	553401	hadhaa	hydroxyacyl-CoA dehydrogenase trifunctional multienzyme complex subunit alpha a	WT to +Krt5; Hyper
1.62727	chr3	54804896	54805895	Intron (NM_001025534, Intron 7 of 12)	19745	564989	nprl3	NPR3-like, GATOR1 complex subunit	WT to +Krt5; Hyper
1.62667	chr7	66039810	66040809	Intergenic	-126890	405885	pth1b	parathyroid hormone 1b	WT to +Krt5; Hyper
1.62666	chr8	43840588	43841587	Intergenic	-58701	100170793	ulk1a	unc-51 like autophagy activating kinase 1a	WT to +Krt5; Hyper
1.62629	chr20	42771160	42772159	Promoter-TSS (NM_213150)	-133	406424	slc22a2	solute carrier family 22 member 2	WT to +Krt5; Hyper
1.62605	chr13	5366185	5367184	Intron (NM_131893, Intron 12 of 12)	74292	170446	meis1b	Meis homeobox 1 b	WT to +Krt5; Hyper
1.62559	chr4	34642093	34643102	Promoter-TSS (NM_001115112)	-5	100141499	zgc:174698	zgc:174698	WT to +Krt5; Hyper
1.62539	chr11	39020607	39021606	Intergenic	-80145	30123	wnt4	wingless-type MMTV integration site family, member 4	WT to +Krt5; Hyper
1.62524	chr7	5052505	5053561	Intergenic	-12621	100170825	zgc:195075	zgc:195075	WT to +Krt5; Hyper
1.62521	chr12	21982881	21983880	Intergenic	133401	450067	ormdl3	ORMDL sphingolipid biosynthesis regulator 3	WT to +Krt5; Hyper
1.62479	chr5	24690748	24691747	Intergenic	85747	567943	rorb	RAR-related orphan receptor B	WT to +Krt5; Hyper
1.62437	chr17	48571540	48572539	Intergenic	51325	570159	kcnk5a	potassium channel, subfamily K, member 5a	WT to +Krt5; Hyper
1.62401	chr25	13461344	13462431	Intergenic	-5153	565195	ano10b	anoctamin 10b	WT to +Krt5; Hyper
1.62192	chr3	16825221	16826800	Intergenic	53533	324307	atp6v0a1a	ATPase H+ transporting V0 subunit a1a	WT to +Krt5; Hyper
1.62085	chr17	14550118	14551117	Intergenic	55147	563642	sdsl	serine dehydratase-like	WT to +Krt5; Hyper
1.62052	chr2	47186851	47187948	Intergenic	391301	30532	pax3a	paired box 3a	WT to +Krt5; Hyper
1.62017	chr12	36620205	36621505	Intergenic	-7847	100002312	crhr2	corticotropin releasing hormone receptor 2	WT to +Krt5; Hyper
1.61996	chr15	35218259	35219270	Exon (NM_213519, Exon 6 of 10)	24559	553529	bloc1s3	biogenesis of lysosomal organelles complex-1, subunit 3	WT to +Krt5; Hyper
1.61944	chr3	32588170	32589169	Intergenic	21910	394058	fus	FUS RNA binding protein	WT to +Krt5; Hyper
1.61934	chr23	22180432	22181437	Intron (NM_152958, Intron 2 of 14)	23293	171465	phc2a	polyhomeotic homolog 2a (Drosophila)	WT to +Krt5; Hyper
1.61929	chr4	21650206	21651205	Intron (NM_001006015, Intron 1 of 5)	95145	449994	pawr	PRKC, apoptosis, WT1, regulator	WT to +Krt5; Hyper
1.61921	chr11	38651225	38652224	Intergenic	130917	550431	cldn19	claudin 19	WT to +Krt5; Hyper
1.61918	chr1	13958605	13959640	Intergenic	-5959	100310757	mir2185-1	microRNA mir-2185-1	WT to +Krt5; Hyper
1.61915	chr10	44043779	44044863	Intergenic	72910	445325	sept5b	septin 5b	WT to +Krt5; Hyper
1.6191	chr9	56317984	56319156	Intergenic	76481	100141344	asmt	acetylserotonin O-methyltransferase	WT to +Krt5; Hyper
1.61852	chr3	53628416	53629415	Intron (NM_001190756, Intron 20 of 66)	110322	100330523	col5a3a	collagen, type V, alpha 3a	WT to +Krt5; Hyper
1.61837	chr2	15266244	15267243	Intergenic	97819	436771	hccsa.1	holocytochrome c synthase a	WT to +Krt5; Hyper
1.61835	chr13	7036620	7037619	Intergenic	-18501	563246	exoc3l4	exocyst complex component 3-like 4	WT to +Krt5; Hyper
1.61705	chr13	41334373	41335372	Intron (NM_001012482, Intron 2 of 35)	86017	368476	pcdh15a	protocadherin-related 15a	WT to +Krt5; Hyper
1.61692	chr7	5114786	5115785	Intergenic	-74873	100170825	zgc:195075	zgc:195075	WT to +Krt5; Hyper
1.61671	chr16	46744788	46745787	Intron (NM_001029971, Intron 3 of 4)	-13084	386994	rab11al	RAB11a, member RAS oncogene family, like	WT to +Krt5; Hyper
1.61659	chr5	18470217	18471216	Exon (NM_001128545, Exon 18 of 24)	-12791	559297	ankle2	ankyrin repeat and LEM domain containing 2	WT to +Krt5; Hyper
1.61641	chr12	38778089	38779177	Intergenic	145489	100151075	abca5	ATP-binding cassette, sub-family A (ABC1), member 5	WT to +Krt5; Hyper
1.61573	chr4	5766375	5767374	Promoter-TSS (NM_199951)	23	335429	ccnc	cyclin C	WT to +Krt5; Hyper
1.61562	chr14	4736541	4737540	Intergenic	-73198	322903	nanos1	nanos homolog 1	WT to +Krt5; Hyper
1.61542	chr5	33003819	33004906	Intergenic	-7436	100002237	LOC100002237	uncharacterized LOC100002237	WT to +Krt5; Hyper
1.61523	chr4	52478026	52479025	Intergenic	-77949	100008037	si:ch211-227e10.6	si:ch211-227e10.6	WT to +Krt5; Hyper
1.61435	chr3	125705	127009	Intergenic	15627	100101650	zgc:165518	zgc:165518	WT to +Krt5; Hyper
1.61426	chr16	21112676	21113675	Intergenic	3553	58048	hoxa9b	homeobox A9b	WT to +Krt5; Hyper
1.61417	chr11	5053086	5054218	Intron (NM_001329864, Intron 1 of 29)	119067	561197	ptprga	protein tyrosine phosphatase receptor type Ga	WT to +Krt5; Hyper
1.61389	chr10	35927212	35928211	Intergenic	-155113	321622	hmgb1a	high mobility group box 1a	WT to +Krt5; Hyper
1.61354	chr7	25823007	25824006	Intergenic	-6882	114549	ache	acetylcholinesterase	WT to +Krt5; Hyper
1.61336	chr12	13835837	13836836	Intergenic	-33779	324381	fkbp10b	FKBP prolyl isomerase 10b	WT to +Krt5; Hyper
1.61261	chr22	11686666	11687683	Intergenic	-2755	503587	crygs1	crystallin, gamma S1	WT to +Krt5; Hyper
1.61166	chr17	9576191	9577190	Intergenic	197303	406602	egln3	egl-9 family hypoxia-inducible factor 3	WT to +Krt5; Hyper
1.61129	chr15	30899293	30900292	Intron (NM_201109, Intron 5 of 14)	35941	394084	msi2b	musashi RNA-binding protein 2b	WT to +Krt5; Hyper
1.61117	chr13	18214531	18215552	Promoter-TSS (NM_001201356)	-179	796266	si:dkey-228d14.5	si:dkey-228d14.5	WT to +Krt5; Hyper
1.61108	chr23	17704688	17705687	Intergenic	25818	559796	bhlhe23	basic helix-loop-helix family, member e23	WT to +Krt5; Hyper
1.61102	chr18	29941110	29942109	Intergenic	5854	767810	mhc2dbb	major histocompatibility complex class II DBB gene	WT to +Krt5; Hyper
1.61092	chr22	21826928	21827927	Intron (NM_001045036, Intron 7 of 7)	-6945	393395	tle5	TLE family member 5, transcriptional modulator	WT to +Krt5; Hyper
1.61087	chr2	39906210	39907349	Intergenic	-113359	436940	slc25a36a	solute carrier family 25 member 36a	WT to +Krt5; Hyper
1.61085	chr3	6892327	6893326	Intergenic	138878	246090	cygb1	cytoglobin 1	WT to +Krt5; Hyper
1.61064	chr5	65455568	65456632	Intron (NM_001029972, Intron 1 of 4)	2811	574425	zgc:114041	zgc:114041	WT to +Krt5; Hyper
1.61063	chr2	8332174	8333173	Intergenic	18229	561896	chst2a	carbohydrate (N-acetylglucosamine-6-O) sulfotransferase 2a	WT to +Krt5; Hyper
1.61053	chr2	9375730	9376729	Intergenic	112349	415239	pigk	phosphatidylinositol glycan anchor biosynthesis, class K	WT to +Krt5; Hyper
1.61024	chr6	30486151	30487150	Intergenic	11445	751666	zgc:153311	zgc:153311	WT to +Krt5; Hyper
1.60979	chr13	28337247	28338383	Intergenic	-27252	30538	fgf8a	fibroblast growth factor 8a	WT to +Krt5; Hyper
1.60937	chr19	9939532	9940531	Intron (NM_001083084, Intron 3 of 5)	8045	100034540	cacng7a	calcium channel, voltage-dependent, gamma subunit 7a	WT to +Krt5; Hyper
1.60897	chr19	42405392	42406391	Promoter-TSS (NM_001104526)	74	557667	trioa	trio Rho guanine nucleotide exchange factor a	WT to +Krt5; Hyper
1.60895	chr7	71140383	71141382	Intron (NM_001006020, Intron 3 of 11)	2609	449999	ccdc149a	coiled-coil domain containing 149a	WT to +Krt5; Hyper
1.60872	chr18	21686880	21687897	Intron (NM_199213, Intron 2 of 22)	8601	326710	mbtps1	membrane-bound transcription factor peptidase, site 1	WT to +Krt5; Hyper
1.60854	chr4	45044138	45045164	Intergenic	-645855	30186	crestin	crestin	WT to +Krt5; Hyper
1.60822	chr16	41188568	41189567	Intergenic	-7521	100007322	ptpn23a	protein tyrosine phosphatase, non-receptor type 23, a	WT to +Krt5; Hyper
1.60821	chr4	59075812	59076811	Intergenic	-91868	100136867	LOC100136867	uncharacterized LOC100136867	WT to +Krt5; Hyper
1.60771	chr25	10685737	10686736	Intergenic	-10469	436812	ap3s2	adaptor related protein complex 3 subunit sigma 2	WT to +Krt5; Hyper
1.60769	chr16	4782622	4783621	Intergenic	-2132	493634	arnt	aryl hydrocarbon receptor nuclear translocator	WT to +Krt5; Hyper
1.60742	chr22	7454654	7455653	Intergenic	-1868	574008	cela1.4	chymotrypsin like elastase family member 1, tandem duplicate 4	WT to +Krt5; Hyper
1.6068	chr1	49705101	49706100	Intergenic	55447	562232	aimp1a	aminoacyl tRNA synthetase complex interacting multifunctional protein 1a	WT to +Krt5; Hyper
1.60676	chr19	2038170	2039208	Intron (NM_198819, Intron 25 of 26)	-27520	792465	mturn	maturin, neural progenitor differentiation regulator homolog (Xenopus)	WT to +Krt5; Hyper
1.60674	chr5	55590767	55591845	Intergenic	-7321	30454	lhx1b	LIM homeobox 1b	WT to +Krt5; Hyper
1.60673	chr13	20930706	20931764	Intergenic	-521427	555816	si:ch1073-126c3.2	si:ch1073-126c3.2	WT to +Krt5; Hyper
1.60647	chr2	14341480	14342479	Intergenic	261511	447884	tctex1d1	Tctex1 domain containing 1	WT to +Krt5; Hyper
1.60616	chr5	64955699	64956698	Intron (NM_001100001, Intron 6 of 18)	27683	561094	camsap1b	calmodulin regulated spectrin-associated protein 1b	WT to +Krt5; Hyper
1.60559	chr15	2507176	2508175	TTS (NM_001328065)	-4649	393890	panx1a	pannexin 1a	WT to +Krt5; Hyper
1.60542	chr4	49739255	49740254	Intergenic	-663941	503965	si:dkey-48g21.7	si:dkey-48g21.7	WT to +Krt5; Hyper
1.60515	chr4	28304588	28305620	Intergenic	59146	553625	trmu	tRNA 5-methylaminomethyl-2-thiouridylate methyltransferase	WT to +Krt5; Hyper
1.6051	chr16	29074239	29075297	Intron (NM_001201535, Intron 15 of 30)	14682	555764	gon4l	gon-4-like (C. elegans)	WT to +Krt5; Hyper
1.60497	chr5	53504521	53505520	Intergenic	45571	550406	grk1b	G protein-coupled receptor kinase 1 b	WT to +Krt5; Hyper
1.60431	chr21	28983743	28984772	Intron (NM_001198550, Intron 2 of 13)	62480	794574	ppp3ca	protein phosphatase 3, catalytic subunit, alpha isozyme	WT to +Krt5; Hyper
1.60399	chr16	16134295	16135294	Intergenic	109425	553579	fabp11b	fatty acid binding protein 11b	WT to +Krt5; Hyper
1.60378	chr17	16340933	16341933	Intergenic	-6978	571467	kcnk13a	potassium channel, subfamily K, member 13a	WT to +Krt5; Hyper
1.60371	chr5	37757347	37758346	Intron (NM_001313841, Intron 6 of 30)	26756	100038799	mink1	misshapen-like kinase 1	WT to +Krt5; Hyper
1.60342	chr22	2440067	2441066	Intron (NM_001013285, Intron 1 of 4)	26021	570825	znf1177	zinc finger protein 1177	WT to +Krt5; Hyper
1.60317	chr18	14669081	14670080	Intron (NM_001013351, Intron 3 of 16)	4113	503773	vps9d1	VPS9 domain containing 1	WT to +Krt5; Hyper
1.60309	chr16	12666051	12667050	Exon (NM_001289880, Exon 12 of 15)	35580	102725533	rasip1	Ras interacting protein 1	WT to +Krt5; Hyper
1.6027	chr1	8397882	8398881	Intergenic	40937	573619	ndufab1a	NADH:ubiquinone oxidoreductase subunit AB1a	WT to +Krt5; Hyper
1.60268	chr9	47395179	47396220	Intergenic	-353999	403039	igfbp5b	insulin-like growth factor binding protein 5b	WT to +Krt5; Hyper
1.60249	chr2	43560025	43561295	Intergenic	-59163	402973	nrp1b	neuropilin 1b	WT to +Krt5; Hyper
1.60195	chr11	22992076	22993075	Intergenic	-19655	100004617	csf1a	colony stimulating factor 1a (macrophage)	WT to +Krt5; Hyper
1.60194	chr21	25014807	25015806	Intergenic	-2509	795694	zgc:171740	zgc:171740	WT to +Krt5; Hyper
1.60172	chr14	44363298	44364786	TTS (NM_001008575)	20985	497184	slc30a9	solute carrier family 30 member 9	WT to +Krt5; Hyper
1.6012	chr15	28926837	28927836	Intergenic	47495	569375	eml2	EMAP like 2	WT to +Krt5; Hyper
1.60092	chr8	51108381	51109380	Intergenic	-116783	431725	rab7b	RAB7b, member RAS oncogene family	WT to +Krt5; Hyper
1.60083	chr20	31609802	31610801	Intergenic	-15880	557132	sash1a	SAM and SH3 domain containing 1a	WT to +Krt5; Hyper
1.60076	chr1	10630440	10631439	Intergenic	207307	792608	knstrn	kinetochore localized astrin (SPAG5) binding protein	WT to +Krt5; Hyper
1.6007	chr17	33865397	33866396	Intron (NM_001361235, Intron 3 of 10)	99023	797512	fut8a	fucosyltransferase 8a (alpha (1,6) fucosyltransferase)	WT to +Krt5; Hyper
1.60057	chr23	5194627	5195626	Intron (NM_001083024, Intron 2 of 8)	3596	100009655	etv7	ets variant 7	WT to +Krt5; Hyper
1.60029	chr3	59733283	59734282	Intergenic	17180	100302390	si:ch211-110e21.3	si:ch211-110e21.3	WT to +Krt5; Hyper
1.60013	chr20	55155704	55156703	Intergenic	248360	405898	pak7	p21 protein (Cdc42/Rac)-activated kinase 7	WT to +Krt5; Hyper
1.59963	chr24	14249719	14250718	Intron (NM_131777, Intron 11 of 21)	-56767	563151	prdm14	PR domain containing 14	WT to +Krt5; Hyper
1.59956	chr7	53590357	53591474	Intron (NM_001328497, Intron 1 of 28)	105914	266983	neo1a	neogenin 1a	WT to +Krt5; Hyper
1.59955	chr21	1914432	1915443	Intergenic	127200	555511	add1	adducin 1 (alpha)	WT to +Krt5; Hyper
1.59914	chr4	53887862	53888861	Intergenic	-496967	100142651	zgc:174275	zgc:174275	WT to +Krt5; Hyper
1.59893	chr19	18054599	18055598	Intergenic	113380	30271	nr1d2b	nuclear receptor subfamily 1, group D, member 2b	WT to +Krt5; Hyper
1.59886	chr14	49141346	49142345	Intron (NM_001190934, Intron 13 of 16)	-26449	447859	etfdh	electron transfer flavoprotein dehydrogenase	WT to +Krt5; Hyper
1.59866	chr10	8191462	8192461	Intron (NM_001326497, Intron 3 of 4)	2382	100537904	mcidas	multiciliate differentiation and DNA synthesis associated cell cycle protein	WT to +Krt5; Hyper
1.59857	chr18	3763463	3764462	Intergenic	288646	336797	serp1	stress-associated endoplasmic reticulum protein 1	WT to +Krt5; Hyper
1.5984	chr15	35682845	35683844	Intergenic	287942	567225	zgc:158328	zgc:158328	WT to +Krt5; Hyper
1.59828	chr18	10285033	10286032	Intergenic	43806	566572	lrrc4.2	leucine rich repeat containing 4.2	WT to +Krt5; Hyper
1.59766	chr25	3830157	3831156	Intergenic	-63639	393742	tmem258	transmembrane protein 258	WT to +Krt5; Hyper
1.59754	chr15	30213809	30214808	Intergenic	-62553	563460	nlk2	nemo-like kinase, type 2	WT to +Krt5; Hyper
1.59743	chr19	8494205	8495256	Intergenic	-68147	393569	efna1a	ephrin-A1a	WT to +Krt5; Hyper
1.59716	chr22	28632698	28633697	Intergenic	62403	445190	jagn1b	jagunal homolog 1b	WT to +Krt5; Hyper
1.59654	chr8	24121551	24122550	Intergenic	-8118	100150997	adora1b	adenosine A1 receptor b	WT to +Krt5; Hyper
1.59599	chr11	12441968	12442967	Intergenic	-47697	555814	zgc:174354	zgc:174354	WT to +Krt5; Hyper
1.59591	chr25	8877921	8878920	Intergenic	29554	541510	accs	1-aminocyclopropane-1-carboxylate synthase homolog (Arabidopsis)(non-functional)	WT to +Krt5; Hyper
1.59583	chr7	947959	949007	Intron (NM_001077212, Intron 1 of 25)	5574	407638	dctn1a	dynactin 1a	WT to +Krt5; Hyper
1.59569	chr11	34092395	34093892	Intergenic	120203	334166	fam43a	family with sequence similarity 43 member A	WT to +Krt5; Hyper
1.59541	chr19	26944388	26945387	Intron (NM_001044937, Intron 4 of 20)	104376	560653	npr1a	natriuretic peptide receptor 1a	WT to +Krt5; Hyper
1.59505	chr19	41615998	41617204	Intron (NM_001128704, Intron 2 of 9)	9388	561007	pdk4	pyruvate dehydrogenase kinase, isozyme 4	WT to +Krt5; Hyper
1.59493	chr9	32673834	32674833	Intergenic	119335	563435	satb2	SATB homeobox 2	WT to +Krt5; Hyper
1.59478	chr2	53469998	53470997	Intron (NM_001002071, Intron 5 of 5)	62435	415161	sirt6	sirtuin 6	WT to +Krt5; Hyper
1.59437	chr12	4939033	4940032	Intergenic	54036	564048	plekhm1	pleckstrin homology domain containing, family M (with RUN domain) member 1	WT to +Krt5; Hyper
1.59305	chr18	35460159	35461265	Intron (NM_001305471, Intron 5 of 6)	24938	322720	itpkcb	inositol-trisphosphate 3-kinase Cb	WT to +Krt5; Hyper
1.59301	chr16	49581923	49582922	Intergenic	158979	393945	rab5ab	RAB5A, member RAS oncogene family, b	WT to +Krt5; Hyper
1.59272	chr15	11557753	11558752	Intergenic	53025	541390	ndufc2	NADH:ubiquinone oxidoreductase subunit C2	WT to +Krt5; Hyper
1.59242	chr8	26793901	26794900	Intergenic	-4907	564557	si:ch211-156j16.1	si:ch211-156j16.1	WT to +Krt5; Hyper
1.59146	chr23	28299687	28300686	Intergenic	-85722	100320280	tac3a	tachykinin 3a	WT to +Krt5; Hyper
1.59114	chr22	22686544	22687543	Intron (NM_001313729, Intron 3 of 6)	7419	30749	nr5a2	nuclear receptor subfamily 5, group A, member 2	WT to +Krt5; Hyper
1.59108	chr10	12555781	12556780	Intergenic	-486295	368461	lpar1	lysophosphatidic acid receptor 1	WT to +Krt5; Hyper
1.59026	chr8	53312274	53313273	Intergenic	-11747	402915	sult1st4	sulfotransferase family 1, cytosolic sulfotransferase 4	WT to +Krt5; Hyper
1.59002	chr17	34789966	34790994	Intergenic	-67513	266599	id2a	inhibitor of DNA binding 2a	WT to +Krt5; Hyper
1.58936	chr5	10903081	10904228	Exon (NM_001195784, Exon 4 of 4)	-3483	553704	zgc:112294	zgc:112294	WT to +Krt5; Hyper
1.58923	chr3	45845590	45846608	Intergenic	-425146	767746	zgc:153426	zgc:153426	WT to +Krt5; Hyper
1.5891	chr3	33200360	33201383	Intergenic	-8354	30211	pyya	peptide YYa	WT to +Krt5; Hyper
1.58887	chr4	71929664	71930679	Intergenic	-23268	562615	znf1015	zinc finger protein 1015	WT to +Krt5; Hyper
1.58837	chr2	11774125	11775761	Intergenic	-45724	368228	penka	proenkephalin a	WT to +Krt5; Hyper
1.58781	chr14	36732583	36734061	Intergenic	188112	567278	lect2l	leukocyte cell-derived chemotaxin 2 like	WT to +Krt5; Hyper
1.58776	chr9	22156287	22157580	Intron (NM_001128231, Intron 1 of 32)	2265	553341	lmo7a	LIM domain 7a	WT to +Krt5; Hyper
1.58771	chr19	13557585	13559100	Intergenic	65865	321872	srsf4	serine and arginine rich splicing factor 4	WT to +Krt5; Hyper
1.5876	chr20	18565555	18566629	Intron (NM_001045125, Intron 6 of 35)	69849	567039	cdc42bpb	CDC42 binding protein kinase beta (DMPK-like)	WT to +Krt5; Hyper
1.58709	chr7	65452998	65453997	Intron (NM_001110471, Intron 1 of 12)	3207	567123	parvab	parvin, alpha b	WT to +Krt5; Hyper
1.58679	chr16	45014836	45015835	Intergenic	19711	777792	sult2st3	sulfotransferase family 2, cytosolic sulfotransferase 3	WT to +Krt5; Hyper
1.58672	chr13	42430702	42431701	Intergenic	13252	100317168	si:dkey-221j11.3	si:dkey-221j11.3	WT to +Krt5; Hyper
1.58654	chr2	23318815	23319955	Intron (NM_001040384, Intron 8 of 11)	-8960	335897	sap130b	Sin3A-associated protein b	WT to +Krt5; Hyper
1.58606	chr8	24465937	24466976	Intergenic	206170	406397	mmp9	matrix metallopeptidase 9	WT to +Krt5; Hyper
1.58594	chr1	1822146	1823145	Intergenic	-54646	100004287	slc5a3a	solute carrier family 5 member 3a	WT to +Krt5; Hyper
1.58516	chr16	46101771	46102770	Exon (NM_001326441, Exon 14 of 17)	68005	101882209	mtmr11	myotubularin related protein 11	WT to +Krt5; Hyper
1.58502	chr10	45562866	45563924	Intergenic	64433	335519	ppiab	peptidylprolyl isomerase Ab (cyclophilin A)	WT to +Krt5; Hyper
1.58491	chr5	32085382	32086381	Intergenic	-105211	326935	ier5l	immediate early response 5-like	WT to +Krt5; Hyper
1.58476	chr7	52167448	52168462	Intergenic	78277	100270671	gnrhr2	gonadotropin releasing hormone receptor 2	WT to +Krt5; Hyper
1.58451	chr16	6379514	6380513	Intergenic	-16261	791163	cmtm8b	CKLF-like MARVEL transmembrane domain containing 8b	WT to +Krt5; Hyper
1.58421	chr3	32135152	32136151	Intergenic	-74552	791526	prl	prolactin	WT to +Krt5; Hyper
1.58353	chr16	22905726	22906725	Intergenic	-40169	100002665	lenep	lens epithelial protein	WT to +Krt5; Hyper
1.58319	chr2	56477499	56478498	Intron (NM_001365187, Intron 1 of 16)	34023	100005033	pip5k1cb	phosphatidylinositol-4-phosphate 5-kinase, type I, gamma b	WT to +Krt5; Hyper
1.58316	chr19	16032321	16033320	Intergenic	-78855	322089	ctps1a	CTP synthase 1a	WT to +Krt5; Hyper
1.58298	chr24	24641570	24642710	Intron (NM_001168263, Intron 1 of 12)	10141	100151215	pde7a	phosphodiesterase 7A	WT to +Krt5; Hyper
1.58297	chr10	3531355	3532354	Exon (NM_001037412, Exon 7 of 7)	11902	641423	pla2g3	phospholipase A2 group III	WT to +Krt5; Hyper
1.5829	chr21	4989155	4990223	Intron (NM_173226, Intron 8 of 21)	-14900	641576	zgc:122979	zgc:122979	WT to +Krt5; Hyper
1.58288	chr4	75121436	75122462	Intron (NM_001017783, Intron 4 of 6)	5853	550480	ms4a17a.1	membrane-spanning 4-domains, subfamily A, member 17A.1	WT to +Krt5; Hyper
1.58278	chr17	3980849	3981848	Intergenic	91639	30631	bmp2a	bone morphogenetic protein 2a	WT to +Krt5; Hyper
1.58266	chr10	13277222	13278509	TTS (NM_001045339)	3388	368621	si:busm1-57f23.1	si:busm1-57f23.1	WT to +Krt5; Hyper
1.58249	chr15	17815099	17816098	Intergenic	-96970	553749	zgc:113279	zgc:113279	WT to +Krt5; Hyper
1.5824	chr15	41870407	41871698	Intron (NM_001002430, Intron 2 of 5)	12745	436703	pxylp1	2-phosphoxylose phosphatase 1	WT to +Krt5; Hyper
1.58233	chr18	22591592	22592591	Intergenic	-25055	568309	bcar1	BCAR1 scaffold protein, Cas family member	WT to +Krt5; Hyper
1.58214	chr16	53517486	53518485	Intergenic	-50826	562236	rbm24b	RNA binding motif protein 24b	WT to +Krt5; Hyper
1.58199	chr3	41115547	41116546	Intergenic	277857	107988043	si:ch211-222n22.1	si:ch211-222n22.1	WT to +Krt5; Hyper
1.58196	chr24	11105551	11106550	Intron (NM_001353925, Intron 2 of 15)	79432	567049	myrip	myosin VIIA and Rab interacting protein	WT to +Krt5; Hyper
1.58187	chr5	41494608	41495613	Exon (NM_001013272, Exon 2 of 2)	-2343	373879	p2rx5	purinergic receptor P2X, ligand-gated ion channel, 5	WT to +Krt5; Hyper
1.58148	chr4	48444927	48445926	Intron (NM_001328335, Intron 1 of 4)	471	100329981	si:dkey-156k2.1	si:dkey-156k2.1	WT to +Krt5; Hyper
1.58141	chr15	42830715	42831724	Intron (NM_001123284, Intron 1 of 11)	19481	567212	slc8a2b	solute carrier family 8 member 2b	WT to +Krt5; Hyper
1.58136	chr18	19577502	19578572	Intergenic	-76023	492409	snapc5	small nuclear RNA activating complex, polypeptide 5	WT to +Krt5; Hyper
1.58135	chr5	47965848	47966903	Intergenic	46636	563823	mblac2	metallo-beta-lactamase domain containing 2	WT to +Krt5; Hyper
1.58123	chr18	4174889	4176040	Intergenic	700148	336797	serp1	stress-associated endoplasmic reticulum protein 1	WT to +Krt5; Hyper
1.58121	chr14	36473536	36474573	Intron (NM_001020465, Intron 3 of 8)	49035	553950	rnf130	ring finger protein 130	WT to +Krt5; Hyper
1.58068	chr8	24593779	24594784	Intergenic	116765	100126018	prok1	prokineticin 1	WT to +Krt5; Hyper
1.58049	chr5	10663426	10664762	Intergenic	-218229	403306	rtn4r	reticulon 4 receptor	WT to +Krt5; Hyper
1.58032	chr17	46015521	46016520	Intergenic	191119	100033770	mir203a	microRNA 203a	WT to +Krt5; Hyper
1.57951	chr5	33960870	33962114	Intron (NM_198870, Intron 3 of 5)	12228	321033	aif1l	allograft inflammatory factor 1-like	WT to +Krt5; Hyper
1.57931	chr21	36159752	36160751	Intergenic	95553	436776	ndfip1l	Nedd4 family interacting protein 1, like	WT to +Krt5; Hyper
1.57926	chr3	16218004	16219009	Intergenic	45329	393480	eftud2	elongation factor Tu GTP binding domain containing 2	WT to +Krt5; Hyper
1.57883	chr12	36175487	36176486	Exon (NM_001353865, Exon 12 of 27)	15108	563066	cep131	centrosomal protein 131	WT to +Krt5; Hyper
1.57871	chr2	37131780	37132779	Intron (NM_001190816, Intron 3 of 10)	4157	564474	slc1a8b	solute carrier family 1 member 8b	WT to +Krt5; Hyper
1.57858	chr19	31803990	31805870	TTS (NM_001045052)	10186	566699	tmem106bb	transmembrane protein 106Bb	WT to +Krt5; Hyper
1.57855	chr16	33578833	33579832	Intergenic	-59754	30398	pou3f1	POU class 3 homeobox 1	WT to +Krt5; Hyper
1.57842	chr16	40923327	40924355	Intergenic	-80608	30719	gbp	glycogen synthase kinase binding protein	WT to +Krt5; Hyper
1.57838	chr4	26786323	26787322	Intergenic	323114	393495	creld2	cysteine-rich with EGF-like domains 2	WT to +Krt5; Hyper
1.57837	chr13	18017824	18018823	Intron (NM_001303262, Intron 4 of 13)	25549	567204	alox5a	arachidonate 5-lipoxygenase a	WT to +Krt5; Hyper
1.57836	chr7	70651057	70652056	Intergenic	440888	321931	dhx15	DEAH (Asp-Glu-Ala-His) box helicase 15	WT to +Krt5; Hyper
1.57815	chr2	4708552	4709551	Intergenic	-53321	751715	adipoqb	adiponectin, C1Q and collagen domain containing, b	WT to +Krt5; Hyper
1.57781	chr19	7515314	7516313	3' UTR (NM_001099977, Exon 8 of 8)	7210	554849	gabpb2a	GA binding protein transcription factor subunit beta 2a	WT to +Krt5; Hyper
1.57765	chr5	58399676	58400675	Intron (NM_001123287, Intron 14 of 17)	39749	568064	rabep1	rabaptin, RAB GTPase binding effector protein 1	WT to +Krt5; Hyper
1.5774	chr1	38720309	38722057	Intron (NM_001365543, Intron 1 of 30)	51413	30155	tenm3	teneurin transmembrane protein 3	WT to +Krt5; Hyper
1.57723	chr4	66686643	66687838	Intergenic	97999	100008100	zgc:174180	zgc:174180	WT to +Krt5; Hyper
1.57702	chr14	6861401	6862451	Intergenic	27338	565588	ctsf	cathepsin F	WT to +Krt5; Hyper
1.5768	chr8	20743804	20745125	Intergenic	61793	564121	si:ch211-133l5.7	si:ch211-133l5.7	WT to +Krt5; Hyper
1.57679	chr15	31324958	31326009	Intron (NM_001089373, Intron 2 of 9)	6895	556847	cuedc1b	CUE domain containing 1b	WT to +Krt5; Hyper
1.57671	chr11	33873255	33874254	Intergenic	-39138	334082	tdo2b	tryptophan 2,3-dioxygenase b	WT to +Krt5; Hyper
1.57646	chr8	50174219	50175226	Exon (NM_001002419, Exon 8 of 13)	12534	436692	entpd4	ectonucleoside triphosphate diphosphohydrolase 4	WT to +Krt5; Hyper
1.5761	chr23	2323462	2324508	Intergenic	-158213	30477	tcp1	t-complex 1	WT to +Krt5; Hyper
1.57603	chr13	33937969	33938968	Intron (NM_200549, Intron 5 of 19)	-241933	558864	flrt3	fibronectin leucine rich transmembrane 3	WT to +Krt5; Hyper
1.57522	chr18	48484073	48485081	Intron (NM_131348, Intron 5 of 8)	21148	568823	kcnj1a.5	potassium inwardly-rectifying channel, subfamily J, member 1a, tandem duplicate 5	WT to +Krt5; Hyper
1.57439	chr8	7876071	7877605	Intergenic	40497	797143	mbd1a	methyl-CpG binding domain protein 1a	WT to +Krt5; Hyper
1.57422	chr9	42184497	42185496	Intergenic	72374	564123	col18a1a	collagen type XVIII alpha 1 chain a	WT to +Krt5; Hyper
1.57367	chr8	40324160	40325310	Intergenic	-36923	561935	aplnra	apelin receptor a	WT to +Krt5; Hyper
1.57361	chr18	29876436	29877435	Intergenic	43180	368857	cmc2	C-x(9)-C motif containing 2	WT to +Krt5; Hyper
1.57319	chr7	1523086	1524086	Intergenic	80430	562348	supt16h	SPT16 homolog, facilitates chromatin remodeling subunit	WT to +Krt5; Hyper
1.57289	chr5	65245365	65246539	Intergenic	-21155	415178	mymk	myomaker, myoblast fusion factor	WT to +Krt5; Hyper
1.57154	chr9	23498892	23499898	Intron (NM_001128536, Intron 6 of 7)	48217	406531	arl4cb	ADP-ribosylation factor-like 4Cb	WT to +Krt5; Hyper
1.57128	chr21	21690672	21691673	Exon (NM_001130814, Exon 2 of 2)	334	100150837	or124-3	odorant receptor, family E, subfamily 124, member 3	WT to +Krt5; Hyper
1.57116	chr9	5399129	5400128	Intergenic	89869	561268	tnfsf13b	TNF superfamily member 13b	WT to +Krt5; Hyper
1.57098	chr7	19764269	19765548	Intergenic	-50507	393352	snx15	sorting nexin 15	WT to +Krt5; Hyper
1.57094	chr20	29423648	29424647	Intergenic	95494	692323	aven	apoptosis, caspase activation inhibitor	WT to +Krt5; Hyper
1.57081	chr2	3849348	3850383	Intergenic	-14994	378478	egfra	epidermal growth factor receptor a (erythroblastic leukemia viral (v-erb-b) oncogene homolog, avian)	WT to +Krt5; Hyper
1.57068	chr15	34088315	34089314	Exon (NM_001025472, Exon 8 of 10)	18107	553218	lsr	lipolysis stimulated lipoprotein receptor	WT to +Krt5; Hyper
1.57063	chr2	52735491	52736490	Intron (NM_001045238, Intron 12 of 13)	56124	692261	tle2c	TLE family member 2, transcriptional corepressor c	WT to +Krt5; Hyper
1.57056	chr16	38304462	38305461	Exon (NM_001160294, Exon 6 of 8)	14966	563343	prune	prune exopolyphosphatase	WT to +Krt5; Hyper
1.57049	chr13	7371879	7372878	Intergenic	63014	558711	h2afy2	H2A histone family, member Y2	WT to +Krt5; Hyper
1.57046	chr6	50103785	50104875	Intron (NM_205610, Intron 2 of 9)	100673	402903	raly	RALY heterogeneous nuclear ribonucleoprotein	WT to +Krt5; Hyper
1.56997	chr8	6370805	6371939	Intergenic	-167033	564423	vsig8b	V-set and immunoglobulin domain containing 8b	WT to +Krt5; Hyper
1.56993	chr10	16985324	16986323	Intergenic	-75466	394006	stoml2	stomatin (EPB72)-like 2	WT to +Krt5; Hyper
1.56977	chr23	32730631	32731673	Intergenic	-217493	114482646	mir29b3	microRNA mir-29b3	WT to +Krt5; Hyper
1.56976	chr4	75639367	75640386	Promoter-TSS (NM_001002543)	24	436816	psmb10	proteasome subunit beta 10	WT to +Krt5; Hyper
1.56965	chr22	17021063	17022081	Intergenic	22357	100310760	mir2194	microRNA mir-2194	WT to +Krt5; Hyper
1.56953	chr1	34418052	34419141	Intergenic	-43946	100002334	sc:d189	sc:d189	WT to +Krt5; Hyper
1.56936	chr17	40934526	40935525	Intergenic	-11232	503605	supt7l	SPT7 like, STAGA complex gamma subunit	WT to +Krt5; Hyper
1.56935	chr4	6245367	6246366	Intergenic	119299	100150512	si:ch211-262n1.4	si:ch211-262n1.4	WT to +Krt5; Hyper
1.56927	chr16	3145028	3146027	Intergenic	-25287	553685	cyb5r4	cytochrome b5 reductase 4	WT to +Krt5; Hyper
1.56926	chr5	36338717	36340302	Intergenic	6921	81881	crx	cone-rod homeobox	WT to +Krt5; Hyper
1.56904	chr21	28130619	28131618	Intron (NM_001079970, Intron 5 of 23)	173164	558326	nrxn2a	neurexin 2a	WT to +Krt5; Hyper
1.56875	chr18	47214476	47215475	Intergenic	-90798	334784	rbm7	RNA binding motif protein 7	WT to +Krt5; Hyper
1.56842	chr1	23729117	23730116	Intron (NM_001020773, Intron 5 of 19)	42246	553811	sh3d19	SH3 domain containing 19	WT to +Krt5; Hyper
1.56803	chr3	31124254	31125264	Exon (NM_001293671, Exon 3 of 3)	3523	100002992	apnl	actinoporin-like protein	WT to +Krt5; Hyper
1.56785	chr24	42111307	42112333	Intron (NM_201327, Intron 7 of 8)	9020	373100	ssr1	signal sequence receptor, alpha	WT to +Krt5; Hyper
1.56772	chr5	1463817	1464816	Intron (NM_200293, Intron 1 of 3)	2628	393263	ddrgk1	DDRGK domain containing 1	WT to +Krt5; Hyper
1.56751	chr17	47312308	47313335	Intergenic	293415	449988	zgc:103755	zgc:103755	WT to +Krt5; Hyper
1.5672	chr8	47882741	47883740	Intron (NM_001077742, Intron 6 of 18)	22157	777635	plod1a	procollagen-lysine, 2-oxoglutarate 5-dioxygenase 1a	WT to +Krt5; Hyper
1.56709	chr16	26224012	26225011	Intergenic	42815	798792	cd79a	CD79a molecule, immunoglobulin-associated alpha	WT to +Krt5; Hyper
1.56705	chr12	34144062	34145151	Intergenic	-27677	406596	socs3b	suppressor of cytokine signaling 3b	WT to +Krt5; Hyper
1.56666	chr7	63883551	63884904	Intergenic	466163	100144560	zdhhc21	zinc finger, DHHC-type containing 21	WT to +Krt5; Hyper
1.5666	chr12	24763211	24764210	Intergenic	43568	406845	msh2	mutS homolog 2 (E. coli)	WT to +Krt5; Hyper
1.56655	chr21	44794893	44796095	Intergenic	-37553	571664	fstl4	follistatin-like 4	WT to +Krt5; Hyper
1.56645	chr2	46281085	46282138	Intron (NM_201020, Intron 3 of 8)	101931	393995	gpc1b	glypican 1b	WT to +Krt5; Hyper
1.56608	chr10	37883584	37884583	Intergenic	-99259	323481	bhlha9	basic helix-loop-helix family, member a9	WT to +Krt5; Hyper
1.56591	chr18	34821981	34823828	Intergenic	199613	563506	tiparp	TCDD-inducible poly(ADP-ribose) polymerase	WT to +Krt5; Hyper
1.5659	chr14	840554	841553	Intergenic	39838	327368	rgs14a	regulator of G protein signaling 14a	WT to +Krt5; Hyper
1.56548	chr10	43033818	43034870	Intergenic	-36200	386639	zcchc9	zinc finger, CCHC domain containing 9	WT to +Krt5; Hyper
1.56547	chr5	22852207	22853469	TTS (NM_198339)	-39379	567415	nlgn3b	neuroligin 3b	WT to +Krt5; Hyper
1.56541	chr20	19758016	19759015	Intergenic	95715	58120	nme6	NME/NM23 nucleoside diphosphate kinase 6	WT to +Krt5; Hyper
1.56512	chr3	4418669	4419718	Intergenic	171543	100003994	zc3h7ba	zinc finger CCCH-type containing 7Ba	WT to +Krt5; Hyper
1.56474	chr19	15765694	15766693	Intergenic	99264	566899	foxo6b	forkhead box O6 b	WT to +Krt5; Hyper
1.56467	chr9	52704892	52705891	Intergenic	141764	58094	dap1b	death associated protein 1b	WT to +Krt5; Hyper
1.56447	chr20	27804772	27805771	Intergenic	-8353	407718	zbtb1	zinc finger and BTB domain containing 1	WT to +Krt5; Hyper
1.56443	chr13	50555350	50556595	Intron (NM_001014817, Intron 4 of 4)	65019	544653	dntt	deoxynucleotidyltransferase, terminal	WT to +Krt5; Hyper
1.56442	chr17	9944747	9945746	Intron (NM_213465, Intron 7 of 19)	10599	406774	sec23a	Sec23 homolog A, coat complex II component	WT to +Krt5; Hyper
1.56422	chr16	24006332	24007331	Intergenic	7779	322543	apoa4b.1	apolipoprotein A-IV b, tandem duplicate 1	WT to +Krt5; Hyper
1.56406	chr25	10503660	10504718	Intergenic	28916	324530	ppp6r3	protein phosphatase 6, regulatory subunit 3	WT to +Krt5; Hyper
1.564	chr17	33966016	33967015	Intergenic	-80604	555470	gphna	gephyrin a	WT to +Krt5; Hyper
1.56379	chr8	37002290	37003289	Intron (NM_001126443, Intron 8 of 10)	8677	791728	renbp	renin binding protein	WT to +Krt5; Hyper
1.56348	chr4	1356053	1357052	Intergenic	-9505	368211	ptn	pleiotrophin	WT to +Krt5; Hyper
1.56335	chr19	43714536	43715535	Intergenic	-4079	403023	matn1	matrilin 1	WT to +Krt5; Hyper
1.56289	chr15	9280692	9281691	Intron (NM_182967, Intron 1 of 6)	15041	327379	calm3a	calmodulin 3a (phosphorylase kinase, delta)	WT to +Krt5; Hyper
1.56259	chr1	53875818	53877094	Intergenic	68120	559407	tekt4	tektin 4	WT to +Krt5; Hyper
1.56252	chr5	6830581	6831897	Intergenic	77233	553184	crybb3	crystallin, beta B3	WT to +Krt5; Hyper
1.56224	chr5	42762235	42763234	Intergenic	-65004	553415	rhobtb4	Rho related BTB domain containing 4	WT to +Krt5; Hyper
1.56198	chr14	29160239	29161238	Intergenic	-274350	751702	zgc:153146	zgc:153146	WT to +Krt5; Hyper
1.56151	chr3	38352082	38353140	Intron (NM_214788, Intron 4 of 12)	421529	567437	si:dkey-106c17.2	si:dkey-106c17.2	WT to +Krt5; Hyper
1.56148	chr20	34507235	34508303	Exon (NM_001144791, Exon 8 of 14)	9887	559657	niban1a	niban apoptosis regulator 1a	WT to +Krt5; Hyper
1.56117	chr12	1824104	1825152	Intergenic	106608	60641	sox9a	SRY (sex determining region Y)-box 9a	WT to +Krt5; Hyper
1.56104	chr8	20210249	20211248	Exon (NM_001017603, Exon 3 of 7)	3059	550266	acer1	alkaline ceramidase 1	WT to +Krt5; Hyper
1.5608	chr14	17493541	17494540	Intergenic	-200273	751718	rab33a	RAB33A, member RAS oncogene family	WT to +Krt5; Hyper
1.56052	chr3	13813514	13814513	Intergenic	-7980	450003	gcdhb	glutaryl-CoA dehydrogenase b	WT to +Krt5; Hyper
1.56026	chr14	23510028	23511027	Intergenic	-4036	567207	kctd16a	potassium channel tetramerization domain containing 16a	WT to +Krt5; Hyper
1.55905	chr16	2722424	2723423	Intron (NM_001105701, Intron 12 of 13)	60978	100126021	lars2	leucyl-tRNA synthetase 2, mitochondrial	WT to +Krt5; Hyper
1.55902	chr11	8720557	8721624	Intergenic	162805	553608	tbl1xr1a	transducin (beta)-like 1 X-linked receptor 1a	WT to +Krt5; Hyper
1.5589	chr7	61699281	61700280	TTS (NM_001302624)	5894	100330558	smim20	small integral membrane protein 20	WT to +Krt5; Hyper
1.55887	chr15	3581615	3582657	Intergenic	-35041	393290	cog6	component of oligomeric golgi complex 6	WT to +Krt5; Hyper
1.55881	chr12	35787330	35788456	Intron (NM_200236, Intron 10 of 14)	32582	393205	unk	unk zinc finger	WT to +Krt5; Hyper
1.55872	chr6	34118093	34119092	Intergenic	39057	792834	fam183a	family with sequence similarity 183 member A	WT to +Krt5; Hyper
1.55835	chr18	46211452	46212466	Intergenic	-26515	504083	kcnk6	potassium channel, subfamily K, member 6	WT to +Krt5; Hyper
1.55834	chr17	26416657	26417656	Intergenic	169399	791183	fam149b1	family with sequence similarity 149 member B1	WT to +Krt5; Hyper
1.55821	chr16	20047604	20048699	Intron (NM_200816, Intron 8 of 10)	36304	393789	hdac9b	histone deacetylase 9b	WT to +Krt5; Hyper
1.55813	chr5	47158526	47159525	Intergenic	-52260	336118	cox7c	cytochrome c oxidase subunit 7C	WT to +Krt5; Hyper
1.55774	chr17	19250580	19251579	Intergenic	74580	30212	gsc	goosecoid	WT to +Krt5; Hyper
1.5575	chr4	19241493	19242492	Intergenic	-183413	100033644	mir129-1	microRNA 129-1	WT to +Krt5; Hyper
1.55731	chr19	8971142	8972191	Intergenic	-9916	57922	celf3a	cugbp, Elav-like family member 3a	WT to +Krt5; Hyper
1.55719	chr20	23942566	23943565	Exon (NM_001083824, Exon 2 of 7)	468	556440	si:dkey-15j16.3	si:dkey-15j16.3	WT to +Krt5; Hyper
1.55687	chr3	19357719	19358986	Intergenic	47101	553708	pde6ga	phosphodiesterase 6G, cGMP-specific, rod, gamma, paralog a	WT to +Krt5; Hyper
1.55665	chr17	654778	655777	Intergenic	-8156	407989	adssl1	adenylosuccinate synthase like 1	WT to +Krt5; Hyper
1.55664	chr7	30709044	30710043	Intergenic	-48594	541341	terb2	telomere repeat binding bouquet formation protein 2	WT to +Krt5; Hyper
1.5565	chr6	24172775	24173802	Intergenic	49679	337110	si:ch211-181p13.2	si:ch211-181p13.2	WT to +Krt5; Hyper
1.55632	chr11	10499218	10500217	Intergenic	-27022	445406	ect2	epithelial cell transforming 2	WT to +Krt5; Hyper
1.5562	chr4	45166498	45167519	Intergenic	-523498	30186	crestin	crestin	WT to +Krt5; Hyper
1.55619	chr16	40919516	40920515	Intergenic	-84434	30719	gbp	glycogen synthase kinase binding protein	WT to +Krt5; Hyper
1.556	chr20	42958317	42959389	Intergenic	20308	558531	pimr213	Pim proto-oncogene, serine/threonine kinase, related 213	WT to +Krt5; Hyper
1.55582	chr13	45256447	45257483	Intergenic	-37826	445043	syf2	SYF2 pre-mRNA-splicing factor	WT to +Krt5; Hyper
1.5558	chr1	3649854	3650853	Intergenic	-24772	324096	slitrk6	SLIT and NTRK-like family, member 6	WT to +Krt5; Hyper
1.55557	chr5	28309007	28310006	Intergenic	60400	556540	niban2b	niban apoptosis regulator 2b	WT to +Krt5; Hyper
1.5552	chr17	44253546	44254545	Intergenic	72929	559010	exoc5	exocyst complex component 5	WT to +Krt5; Hyper
1.55501	chr7	52230295	52231815	Intergenic	52353	407985	tcf12	transcription factor 12	WT to +Krt5; Hyper
1.555	chr12	10115168	10116167	Intergenic	-10135	445285	psmc5	proteasome 26S subunit, ATPase 5	WT to +Krt5; Hyper
1.55488	chr14	51596351	51597350	Intergenic	-44377	100000948	cox18	cytochrome c oxidase assembly factor COX18	WT to +Krt5; Hyper
1.5548	chr22	1043539	1044565	Intron (NM_199966, Intron 4 of 11)	11580	335654	camk1ga	calcium/calmodulin-dependent protein kinase IGa	WT to +Krt5; Hyper
1.55464	chr11	8862385	8863719	Intergenic	304767	553608	tbl1xr1a	transducin (beta)-like 1 X-linked receptor 1a	WT to +Krt5; Hyper
1.55451	chr12	15056128	15057127	Intergenic	-53695	445059	adprh	ADP-ribosylarginine hydrolase	WT to +Krt5; Hyper
1.55444	chr3	4608825	4610481	Intron (NM_001076616, Intron 11 of 15)	17818	767677	rangap1a	RAN GTPase activating protein 1a	WT to +Krt5; Hyper
1.55443	chr13	51294526	51295525	Intergenic	-10475	58109	valopa	vertebrate ancient long opsin a	WT to +Krt5; Hyper
1.55435	chr20	50713260	50714772	Intergenic	-277614	569213	tmem121ab	transmembrane protein 121Ab	WT to +Krt5; Hyper
1.55403	chr8	34944744	34945743	Intergenic	-47622	573060	LOC573060	E3 ubiquitin-protein ligase RBBP6-like	WT to +Krt5; Hyper
1.55402	chr22	2112730	2113745	Intergenic	28764	110437714	LOC110437714	zinc finger protein 729-like	WT to +Krt5; Hyper
1.55389	chr7	15216846	15217952	Intron (NM_152969, Intron 2 of 20)	18509	245702	igf1rb	insulin-like growth factor 1b receptor	WT to +Krt5; Hyper
1.55354	chr19	10494184	10495183	Intergenic	17524	393695	necap1	NECAP endocytosis associated 1	WT to +Krt5; Hyper
1.55334	chr21	14022040	14023103	Intergenic	257651	574003	stxbp1a	syntaxin binding protein 1a	WT to +Krt5; Hyper
1.55301	chr22	11939576	11940575	Intergenic	-3063	724006	mgat5	alpha-1,6-mannosylglycoprotein 6-beta-N-acetylglucosaminyltransferase	WT to +Krt5; Hyper
1.55282	chr16	26248632	26249631	Intergenic	18195	798792	cd79a	CD79a molecule, immunoglobulin-associated alpha	WT to +Krt5; Hyper
1.55264	chr8	8584759	8585908	TTS (NM_001123292)	74695	494496	zgc:86609	zgc:86609	WT to +Krt5; Hyper
1.55263	chr2	44771522	44772521	Intergenic	53819	768198	klhl24a	kelch-like family member 24a	WT to +Krt5; Hyper
1.55253	chr24	38806547	38807546	Intron (NM_001045408, Intron 4 of 7)	-49872	567809	slc6a16b	solute carrier family 6 member 16b	WT to +Krt5; Hyper
1.55252	chr5	35537544	35539404	Intergenic	183184	447921	zgc:103697	zgc:103697	WT to +Krt5; Hyper
1.55246	chr13	8209203	8210202	Intergenic	-79523	559639	socs5b	suppressor of cytokine signaling 5b	WT to +Krt5; Hyper
1.55243	chr24	39252212	39254211	Intron (NM_001045408, Intron 3 of 7)	-13085	325402	atp6v0cb	ATPase H+ transporting V0 subunit cb	WT to +Krt5; Hyper
1.55221	chr11	13019125	13020124	Intergenic	35879	393667	btf3l4	basic transcription factor 3-like 4	WT to +Krt5; Hyper
1.5522	chr7	35679636	35680656	Intergenic	-89868	30520	irx3a	iroquois homeobox 3a	WT to +Krt5; Hyper
1.55209	chr7	61503241	61504240	Intergenic	49862	406421	acox3	acyl-CoA oxidase 3, pristanoyl	WT to +Krt5; Hyper
1.55206	chr18	18211269	18212268	Intergenic	96551	436793	cbln1	cerebellin 1 precursor	WT to +Krt5; Hyper
1.55204	chr9	49147276	49148778	Intron (NM_001113604, Intron 11 of 18)	19433	100148449	nostrin	nitric oxide synthase trafficking	WT to +Krt5; Hyper
1.55198	chr25	5395368	5396367	Intron (NM_001197316, Intron 1 of 36)	10358	100333657	plxnb2b	plexin b2b	WT to +Krt5; Hyper
1.55186	chr21	31008644	31009643	Intron (NM_001130656, Intron 10 of 22)	-32029	393112	ncbp3	nuclear cap binding subunit 3	WT to +Krt5; Hyper
1.55133	chr4	19571888	19572954	Intron (NM_182865, Intron 16 of 23)	132759	324404	snd1	staphylococcal nuclease and tudor domain containing 1	WT to +Krt5; Hyper
1.55122	chr16	49153299	49154362	Intergenic	-223953	797793	si:dkey-82o10.4	si:dkey-82o10.4	WT to +Krt5; Hyper
1.55109	chr12	25437333	25438332	Intergenic	-71558	30636	six3b	SIX homeobox 3b	WT to +Krt5; Hyper
1.55105	chr15	40243129	40244128	Intergenic	-25417	664762	gpr55a	G protein-coupled receptor 55a	WT to +Krt5; Hyper
1.551	chr4	46944900	46945899	Intergenic	-41560	100330526	znf1113	zinc finger protein 1113	WT to +Krt5; Hyper
1.55099	chr23	4058108	4059107	Intron (NM_001008586, Intron 4 of 15)	22191	494043	slc9a8	solute carrier family 9 member 8	WT to +Krt5; Hyper
1.55086	chr16	25835840	25836839	Intergenic	-9730	565383	cblc	Cbl proto-oncogene C, E3 ubiquitin protein ligase	WT to +Krt5; Hyper
1.55081	chr5	1786919	1787937	Intron (NM_200293, Intron 3 of 3)	49914	553717	vkorc1l1	vitamin K epoxide reductase complex, subunit 1-like 1	WT to +Krt5; Hyper
1.55073	chr8	1478887	1479886	Intergenic	102134	30223	efna5b	ephrin-A5b	WT to +Krt5; Hyper
1.55072	chr18	13445588	13446659	Intergenic	165679	561747	plcg2	phospholipase C, gamma 2	WT to +Krt5; Hyper
1.55068	chr14	34255559	34256628	Intron (NM_001030213, Intron 1 of 19)	37553	566757	afap1l1a	actin filament associated protein 1-like 1a	WT to +Krt5; Hyper
1.55052	chr6	22156386	22157597	Intron (NM_001017556, Intron 7 of 8)	-10206	100001293	znf207b	zinc finger protein 207, b	WT to +Krt5; Hyper
1.5505	chr21	18411922	18412921	Intergenic	173042	406372	wdr5	WD repeat domain 5	WT to +Krt5; Hyper
1.55046	chr12	40338320	40339372	Intergenic	-195439	336116	bnip3	BCL2 interacting protein 3	WT to +Krt5; Hyper
1.55044	chr20	24572392	24573391	Intergenic	-289230	553788	map3k7	mitogen-activated protein kinase kinase kinase 7	WT to +Krt5; Hyper
1.55042	chr18	15043584	15044583	Intergenic	-70755	559990	mlc1	modulator of VRAC current 1	WT to +Krt5; Hyper
1.5503	chr5	22627097	22628117	Intergenic	-5139	140620	prps1a	phosphoribosyl pyrophosphate synthetase 1A	WT to +Krt5; Hyper
1.55023	chr20	14296233	14297396	Intergenic	78536	558674	kcns3b	potassium voltage-gated channel, delayed-rectifier, subfamily S, member 3b	WT to +Krt5; Hyper
1.55001	chr23	40392224	40393343	Intergenic	10318	571146	tent5ab	terminal nucleotidyltransferase 5Ab	WT to +Krt5; Hyper
1.54977	chr20	54020174	54021173	Intron (NM_001177935, Intron 1 of 1)	6592	798872	dio3b	iodothyronine deiodinase 3b	WT to +Krt5; Hyper
1.54929	chr16	13355038	13356037	Intergenic	-178877	492803	pitpnc1b	phosphatidylinositol transfer protein cytoplasmic 1b	WT to +Krt5; Hyper
1.54911	chr2	56568077	56569258	Intergenic	-36743	352929	gpx4b	glutathione peroxidase 4b	WT to +Krt5; Hyper
1.54859	chr14	6999415	7001144	Intergenic	68329	323003	trappc11	trafficking protein particle complex 11	WT to +Krt5; Hyper
1.54815	chr20	5370773	5371772	Intergenic	-15877	321852	snw1	SNW domain containing 1	WT to +Krt5; Hyper
1.54812	chr25	24477927	24478926	Intergenic	325726	541385	tmem86a	transmembrane protein 86A	WT to +Krt5; Hyper
1.5481	chr20	45114103	45115102	Intergenic	430317	100331225	atad2b	ATPase family AAA domain containing 2B	WT to +Krt5; Hyper
1.54783	chr3	54214113	54215388	Intron (NM_001007403, Intron 3 of 13)	30888	492762	trip10a	thyroid hormone receptor interactor 10a	WT to +Krt5; Hyper
1.5475	chr2	1454026	1455141	Intron (NM_001366848, Intron 4 of 18)	82625	110437953	adgrl2b.1	adhesion G protein-coupled receptor L2b, tandem duplicate 1	WT to +Krt5; Hyper
1.54741	chr8	38817818	38818817	Intron (NM_001083829, Intron 5 of 20)	286314	560915	rfk	riboflavin kinase	WT to +Krt5; Hyper
1.54734	chr17	52584005	52585004	Intergenic	-12071	406513	spred1	sprouty related EVH1 domain containing 1	WT to +Krt5; Hyper
1.54701	chr20	27554067	27555066	Intergenic	47778	100033696	mir203b	microRNA 203b	WT to +Krt5; Hyper
1.54698	chr7	62983225	62984224	Intergenic	-31140	555504	pcdh7b	protocadherin 7b	WT to +Krt5; Hyper
1.54667	chr24	17878510	17879523	Intron (NM_001281991, Intron 1 of 23)	156408	559157	cntnap2a	contactin associated protein like 2a	WT to +Krt5; Hyper
1.54665	chr8	34952722	34953721	Intergenic	-39644	573060	LOC573060	E3 ubiquitin-protein ligase RBBP6-like	WT to +Krt5; Hyper
1.54642	chr3	23826842	23827841	Intergenic	-102576	326746	cbx1a	chromobox homolog 1a (HP1 beta homolog Drosophila)	WT to +Krt5; Hyper
1.54619	chr9	18909214	18910213	Intergenic	-39828	792402	kctd4	potassium channel tetramerization domain containing 4	WT to +Krt5; Hyper
1.54612	chr25	10521296	10522375	Intron (NM_199684, Intron 7 of 24)	11270	324530	ppp6r3	protein phosphatase 6, regulatory subunit 3	WT to +Krt5; Hyper
1.54598	chr5	65890801	65891800	Intergenic	-141048	562138	hip1rb	huntingtin interacting protein 1 related b	WT to +Krt5; Hyper
1.54578	chr10	9550336	9551335	Intron (NM_001004015, Intron 4 of 8)	11692	445565	lhx6	LIM homeobox 6	WT to +Krt5; Hyper
1.54565	chr19	9919843	9920869	Intergenic	-9316	550428	cacng8a	calcium channel, voltage-dependent, gamma subunit 8a	WT to +Krt5; Hyper
1.54561	chr8	43557707	43558706	Intron (NM_001007032, Intron 1 of 44)	9942	561503	ncor2	nuclear receptor corepressor 2	WT to +Krt5; Hyper
1.54532	chr9	10538187	10539186	Intergenic	-182896	114447	cxcr4b	chemokine (C-X-C motif), receptor 4b	WT to +Krt5; Hyper
1.54524	chr22	27130731	27131730	Intergenic	-48171	799354	cxcl12b	chemokine (C-X-C motif) ligand 12b (stromal cell-derived factor 1)	WT to +Krt5; Hyper
1.54506	chr8	17717725	17718806	Intron (NM_001030091, Intron 1 of 17)	17778	555737	prkcz	protein kinase C, zeta	WT to +Krt5; Hyper
1.54444	chr6	42477349	42478420	Intergenic	-57255	322041	ip6k2a	inositol hexakisphosphate kinase 2a	WT to +Krt5; Hyper
1.5443	chr1	1987856	1988925	Intron (NM_001099998, Intron 2 of 7)	34643	560384	mbnl2	muscleblind-like splicing regulator 2	WT to +Krt5; Hyper
1.5442	chr14	8134517	8135516	Intergenic	15449	393440	eif1ad	eukaryotic translation initiation factor 1A domain containing	WT to +Krt5; Hyper
1.54415	chr24	41311173	41312175	Exon (NM_131210, Exon 5 of 12)	45519	30457	acvr2ba	activin A receptor type 2Ba	WT to +Krt5; Hyper
1.54408	chr6	35340064	35341113	Intergenic	-38268	569876	rgs4	regulator of G protein signaling 4	WT to +Krt5; Hyper
1.54356	chr6	48002368	48003440	Intergenic	-153291	394177	phc2b	polyhomeotic homolog 2b (Drosophila)	WT to +Krt5; Hyper
1.54333	chr19	23902590	23903589	Intergenic	190799	100137101	irgf1	immunity-related GTPase family, f1	WT to +Krt5; Hyper
1.54308	chr14	49859228	49860429	Intergenic	-15402	777616	zgc:154054	zgc:154054	WT to +Krt5; Hyper
1.54289	chr2	54224392	54225411	TTS (NM_001017676)	6431	550371	capsla	calcyphosine-like a	WT to +Krt5; Hyper
1.54285	chr2	35588000	35589055	Intergenic	-3968	30234	tnn	tenascin N	WT to +Krt5; Hyper
1.54274	chr7	7526597	7527596	Intron (NM_001353932, Intron 1 of 15)	3856	100007575	intu	inturned planar cell polarity protein	WT to +Krt5; Hyper
1.54248	chr22	16614146	16615145	Intron (NM_001127185, Intron 28 of 43)	84680	368722	pdzk1ip1	PDZK1 interacting protein 1	WT to +Krt5; Hyper
1.5424	chr10	6034044	6036572	Intergenic	23444	394060	hmgcs1	3-hydroxy-3-methylglutaryl-CoA synthase 1 (soluble)	WT to +Krt5; Hyper
1.54221	chr13	48578968	48579967	Intergenic	-114331	445069	ntpcr	nucleoside-triphosphatase, cancer-related	WT to +Krt5; Hyper
1.54218	chr5	59449032	59450031	Intergenic	-395886	564044	tmem132e	transmembrane protein 132E	WT to +Krt5; Hyper
1.54216	chr23	43031282	43032281	Intergenic	110967	450006	myl9a	myosin, light chain 9a, regulatory	WT to +Krt5; Hyper
1.54166	chr18	44212587	44213596	Intergenic	-77517	280652	cdon	cell adhesion associated, oncogene regulated	WT to +Krt5; Hyper
1.54147	chr25	479222	480234	Intergenic	32770	406266	rsl24d1	ribosomal L24 domain containing 1	WT to +Krt5; Hyper
1.54138	chr14	4378338	4379337	Promoter-TSS (NM_001017822)	-517	550520	gabra4	gamma-aminobutyric acid (GABA) A receptor, subunit alpha 4	WT to +Krt5; Hyper
1.54137	chr15	11576832	11577994	Intergenic	72186	541390	ndufc2	NADH:ubiquinone oxidoreductase subunit C2	WT to +Krt5; Hyper
1.5412	chr17	18392040	18393517	Intergenic	295585	100093707	bcl11ba	BAF chromatin remodeling complex subunit BCL11B a	WT to +Krt5; Hyper
1.53974	chr8	18084291	18085290	Intergenic	-78440	799937	dio1	iodothyronine deiodinase 1	WT to +Krt5; Hyper
1.53951	chr17	18738213	18739212	Intergenic	38675	406694	vrk1	VRK serine/threonine kinase 1	WT to +Krt5; Hyper
1.53941	chr25	27583766	27584765	Intergenic	103459	387592	slc13a1	solute carrier family 13 member 1	WT to +Krt5; Hyper
1.53926	chr19	43976669	43977668	Intergenic	-20513	796164	gpr186	G protein-coupled receptor 186	WT to +Krt5; Hyper
1.53925	chr2	819861	820903	Intergenic	-3696	100148408	foxc1a	forkhead box C1a	WT to +Krt5; Hyper
1.53923	chr17	22722986	22723985	Intergenic	-16890	317640	ttc27	tetratricopeptide repeat domain 27	WT to +Krt5; Hyper
1.53905	chr1	50074	51083	Promoter-TSS (NM_200393)	-747	393364	ildr1a	immunoglobulin-like domain containing receptor 1a	WT to +Krt5; Hyper
1.53898	chr20	4305507	4306506	Intergenic	185654	100003037	cnksr3	cnksr family member 3	WT to +Krt5; Hyper
1.5387	chr23	13379406	13380405	Intergenic	159941	100003064	si:ch211-163b2.4	si:ch211-163b2.4	WT to +Krt5; Hyper
1.53866	chr21	14981820	14982819	Intergenic	204156	394143	sfswap	splicing factor SWAP	WT to +Krt5; Hyper
1.53848	chr5	31675467	31676480	Intergenic	16839	799300	myhz1.2	myosin, heavy polypeptide 1.2, skeletal muscle	WT to +Krt5; Hyper
1.53836	chr2	12874110	12875150	Intron (NM_001115122, Intron 4 of 30)	75756	566832	dpp6b	dipeptidyl-peptidase 6b	WT to +Krt5; Hyper
1.53829	chr7	17487453	17488452	Intron (NM_001328361, Intron 2 of 7)	23324	394047	rtn3	reticulon 3	WT to +Krt5; Hyper
1.53816	chr17	30783272	30784271	Intron (NM_001130785, Intron 5 of 6)	-43172	798347	tpp1	tripeptidyl peptidase I	WT to +Krt5; Hyper
1.53814	chr12	5382908	5383932	Promoter-TSS (NM_001002863)	-39	321289	noc3l	NOC3-like DNA replication regulator	WT to +Krt5; Hyper
1.53795	chr4	3845186	3846185	Intergenic	-125649	568430	gpr37b	G protein-coupled receptor 37b	WT to +Krt5; Hyper
1.53763	chr18	3746841	3747840	Intergenic	272024	336797	serp1	stress-associated endoplasmic reticulum protein 1	WT to +Krt5; Hyper
1.53735	chr11	40920932	40922122	Intergenic	73920	449674	park7	parkinson protein 7	WT to +Krt5; Hyper
1.5372	chr6	25805980	25806979	Intergenic	155834	324849	lmo4b	LIM domain only 4b	WT to +Krt5; Hyper
1.53695	chr16	18913231	18914230	Intergenic	183681	30486	rxrbb	retinoid x receptor, beta b	WT to +Krt5; Hyper
1.53685	chr23	5108015	5109014	Intergenic	-11823	562853	kcna2b	potassium voltage-gated channel, shaker-related subfamily, member 2b	WT to +Krt5; Hyper
1.53683	chr6	22217109	22218194	Intron (NM_001017556, Intron 2 of 8)	9484	550128	rhbdl3	rhomboid, veinlet-like 3 (Drosophila)	WT to +Krt5; Hyper
1.53643	chr16	34107090	34108089	Intergenic	14870	777768	tent5ba	terminal nucleotidyltransferase 5ba	WT to +Krt5; Hyper
1.53631	chr12	42313711	42314896	Intron (NM_001080602, Intron 6 of 15)	33152	567751	ebf3a	EBF transcription factor 3a	WT to +Krt5; Hyper
1.53606	chr1	30273015	30274511	Intergenic	-34742	100004503	eef1a1b	eukaryotic translation elongation factor 1 alpha 1b	WT to +Krt5; Hyper
1.53603	chr16	32053939	32055430	Promoter-TSS (NM_001040300)	-437	678541	gstk4	glutathione S-transferase kappa 4	WT to +Krt5; Hyper
1.53557	chr20	37032107	37033124	Intergenic	-17824	450024	cited2	Cbp/p300-interacting transactivator, with Glu/Asp-rich carboxy-terminal domain, 2	WT to +Krt5; Hyper
1.53556	chr3	19293778	19294777	Intergenic	-2984	641563	zgc:123297	zgc:123297	WT to +Krt5; Hyper
1.53542	chr25	31141306	31142305	Intron (NM_173275, Intron 32 of 33)	35686	103909874	syt8	synaptotagmin VIII	WT to +Krt5; Hyper
1.53537	chr5	27508310	27509309	Intergenic	40798	550500	zgc:110329	zgc:110329	WT to +Krt5; Hyper
1.53535	chr6	31428849	31429848	Intron (NM_131073, Intron 17 of 23)	48191	30280	jak1	Janus kinase 1	WT to +Krt5; Hyper
1.53532	chr5	36754434	36755433	Intron (NM_001244754, Intron 2 of 8)	11396	323951	klhl13	kelch-like family member 13	WT to +Krt5; Hyper
1.53531	chr19	29308960	29309959	Intergenic	-104273	336346	sox4a	SRY (sex determining region Y)-box 4a	WT to +Krt5; Hyper
1.53514	chr19	36257848	36258847	Intron (NM_131814, Intron 7 of 8)	45774	114408	angpt2b	angiopoietin 2b	WT to +Krt5; Hyper
1.53511	chr7	61215762	61216761	Intergenic	-237514	449812	rwdd	RWD domain containing 4	WT to +Krt5; Hyper
1.53475	chr5	64038074	64039073	Intergenic	-12299	436764	olfm1a	olfactomedin 1a	WT to +Krt5; Hyper
1.53474	chr20	19850853	19851852	Intergenic	107998	245950	ptk2bb	protein tyrosine kinase 2 beta, b	WT to +Krt5; Hyper
1.53471	chr17	16785583	16786582	Intron (NM_001033743, Intron 6 of 7)	38728	619262	ston2	stonin 2	WT to +Krt5; Hyper
1.53401	chr13	39742555	39743554	Intergenic	-38128	796610	zgc:171482	zgc:171482	WT to +Krt5; Hyper
1.5334	chr4	30787359	30788362	Intergenic	-58482	100137116	zgc:172014	zgc:172014	WT to +Krt5; Hyper
1.53335	chr7	30464956	30465955	Intron (NM_001077597, Intron 2 of 15)	11132	555239	mtmr10	myotubularin related protein 10	WT to +Krt5; Hyper
1.53325	chr15	24942106	24943116	Intergenic	30603	100033583	mir22a	microRNA 22a	WT to +Krt5; Hyper
1.53323	chr11	25739194	25740193	Intron (NM_001080082, Intron 1 of 7)	63450	790937	kaznb	kazrin, periplakin interacting protein b	WT to +Krt5; Hyper
1.53316	chr18	19056226	19057870	Intron (NM_001080989, Intron 27 of 27)	-40237	327593	ints14	integrator complex subunit 14	WT to +Krt5; Hyper
1.53312	chr25	13364680	13365765	Intron (NM_200870, Intron 2 of 4)	29075	334208	ldhd	lactate dehydrogenase D	WT to +Krt5; Hyper
1.53311	chr5	71038047	71039516	Intron (NM_131208, Intron 2 of 4)	10747	30455	lhx3	LIM homeobox 3	WT to +Krt5; Hyper
1.53309	chr13	45519982	45521503	Intergenic	-28787	791153	ldlrap1b	low density lipoprotein receptor adaptor protein 1b	WT to +Krt5; Hyper
1.53296	chr6	12655980	12657076	Intron (NM_201587, Intron 4 of 16)	8768	378720	ical1	islet cell autoantigen 1-like	WT to +Krt5; Hyper
1.53291	chr8	1312665	1313750	Intergenic	-64045	30223	efna5b	ephrin-A5b	WT to +Krt5; Hyper
1.53274	chr7	8914965	8915964	Intergenic	-129999	492511	snrpa1	small nuclear ribonucleoprotein polypeptide A'	WT to +Krt5; Hyper
1.53272	chr11	3502383	3503563	Intergenic	13140	192339	ddx19	DEAD/H (Asp-Glu-Ala-Asp/His) box polypeptide 19 (DBP5 homolog, yeast)	WT to +Krt5; Hyper
1.53263	chr23	35487178	35488177	Intergenic	62472	449559	tmem18	transmembrane protein 18	WT to +Krt5; Hyper
1.53207	chr18	21855997	21856996	Intron (NM_001324501, Intron 1 of 2)	13457	100004307	nrn1la	neuritin 1-like a	WT to +Krt5; Hyper
1.5317	chr18	29846088	29847087	Intergenic	73528	368857	cmc2	C-x(9)-C motif containing 2	WT to +Krt5; Hyper
1.53148	chr12	6651465	6652464	Intron (NM_001012486, Intron 19 of 34)	219857	30197	dkk1b	dickkopf WNT signaling pathway inhibitor 1b	WT to +Krt5; Hyper
1.53124	chr11	2899848	2900847	Intergenic	-36423	394003	cpne5b	copine Vb	WT to +Krt5; Hyper
1.53112	chr20	14834344	14835343	Intergenic	-49982	558306	scrn2	secernin 2	WT to +Krt5; Hyper
1.53108	chr15	18638209	18639241	Promoter-TSS (NM_131831)	-31	114442	ncam1b	neural cell adhesion molecule 1b	WT to +Krt5; Hyper
1.53099	chr4	6676281	6677910	Intergenic	42151	793299	gpr85	G protein-coupled receptor 85	WT to +Krt5; Hyper
1.53098	chr5	38252947	38253946	Intergenic	28382	553284	mrpl1	mitochondrial ribosomal protein L1	WT to +Krt5; Hyper
1.53096	chr22	26784687	26785686	Intergenic	-56252	570464	wu:fu71h07	wu:fu71h07	WT to +Krt5; Hyper
1.53073	chr11	21062870	21064670	Intergenic	-6262	327321	mapkapk2a	MAPK activated protein kinase 2a	WT to +Krt5; Hyper
1.53056	chr9	26329404	26330403	Intergenic	36958	30219	efnb2a	ephrin-B2a	WT to +Krt5; Hyper
1.53043	chr23	18544053	18545052	Intergenic	-88344	100033546	mirlet7g-1	microRNA let7g-1	WT to +Krt5; Hyper
1.52988	chr24	33796300	33797376	Intergenic	20367	494036	cavin4b	caveolae associated protein 4b	WT to +Krt5; Hyper
1.52976	chr11	15281955	15283034	Intron (NM_001080092, Intron 2 of 3)	18366	791105	ghrh	growth hormone releasing hormone	WT to +Krt5; Hyper
1.52975	chr12	1572320	1573368	Intergenic	108523	692275	usp22	ubiquitin specific peptidase 22	WT to +Krt5; Hyper
1.52941	chr23	25845662	25846661	Intergenic	25397	552928	fitm2	fat storage inducing transmembrane protein 2	WT to +Krt5; Hyper
1.52929	chr17	23733632	23734631	5' UTR (NM_001007325, Exon 2 of 6)	-16766	561821	kcnk18	potassium channel, subfamily K, member 18	WT to +Krt5; Hyper
1.52907	chr9	3067080	3068183	Intergenic	-80066	555772	ftr52p	finTRIM family, member 52, pseudogene	WT to +Krt5; Hyper
1.52896	chr14	9333313	9334312	Intergenic	57930	406756	tmem129	transmembrane protein 129, E3 ubiquitin protein ligase	WT to +Krt5; Hyper
1.52887	chr6	21231093	21232092	Intergenic	496149	559662	ppp1r27b	protein phosphatase 1, regulatory subunit 27b	WT to +Krt5; Hyper
1.52881	chr1	56561380	56562498	Intron (NM_001113805, Intron 11 of 12)	-71756	619261	b3gntl1	UDP-GlcNAc:betaGal beta-1,3-N-acetylglucosaminyltransferase-like 1	WT to +Krt5; Hyper
1.5287	chr12	16297523	16298766	Intergenic	62854	393807	ppp1r3cb	protein phosphatase 1, regulatory subunit 3Cb	WT to +Krt5; Hyper
1.5285	chr1	44272216	44273215	Intergenic	24041	777738	vps37c	VPS37C subunit of ESCRT-I	WT to +Krt5; Hyper
1.52839	chr21	44832491	44833555	Promoter-TSS (NM_001031843)	-24	571664	fstl4	follistatin-like 4	WT to +Krt5; Hyper
1.52821	chr5	40885959	40887269	Intergenic	-9827	402936	fancg	FA complementation group G	WT to +Krt5; Hyper
1.52811	chr6	9952985	9954129	Intergenic	116875	559447	scn1lab	sodium channel, voltage-gated, type I like, alpha b	WT to +Krt5; Hyper
1.5281	chr3	18852300	18853546	Intergenic	66658	100535597	si:ch211-198m1.1	si:ch211-198m1.1	WT to +Krt5; Hyper
1.52798	chr14	6103551	6104709	Intergenic	-18542	100136868	abca1b	ATP-binding cassette, sub-family A (ABC1), member 1B	WT to +Krt5; Hyper
1.52786	chr6	22197831	22198830	Intron (NM_001017556, Intron 2 of 8)	28805	550128	rhbdl3	rhomboid, veinlet-like 3 (Drosophila)	WT to +Krt5; Hyper
1.52766	chr19	1338321	1339320	Exon (NM_001113615, Exon 25 of 29)	-7157	393385	slc44a4	solute carrier family 44 member 4	WT to +Krt5; Hyper
1.52761	chr11	9289292	9290449	Intergenic	675000	100002610	nlgn1	neuroligin 1	WT to +Krt5; Hyper
1.52753	chr18	36591891	36592903	Intergenic	-9410	555385	siae	sialic acid acetylesterase	WT to +Krt5; Hyper
1.52745	chr20	5614207	5615629	Intron (NM_001080047, Intron 3 of 19)	-53406	100006791	zgc:165600	zgc:165600	WT to +Krt5; Hyper
1.52744	chr15	38614663	38615662	Intergenic	295551	556360	stim1a	stromal interaction molecule 1a	WT to +Krt5; Hyper
1.52737	chr2	25712377	25713412	Intergenic	-9929	572313	fndc3ba	fibronectin type III domain containing 3Ba	WT to +Krt5; Hyper
1.52735	chr18	782055	783176	Intergenic	107890	541542	fam219b	family with sequence similarity 219 member B	WT to +Krt5; Hyper
1.52689	chr20	53623774	53625173	Intergenic	61265	494534	cdc40	cell division cycle 40 homolog (S. cerevisiae)	WT to +Krt5; Hyper
1.52686	chr21	14490383	14491382	Intergenic	104508	402830	ehmt1b	euchromatic histone-lysine N-methyltransferase 1b	WT to +Krt5; Hyper
1.52676	chr17	9784808	9785855	Intergenic	8953	541337	sptssa	serine palmitoyltransferase, small subunit A	WT to +Krt5; Hyper
1.52665	chr24	292926	294330	Intron (NM_001013328, Intron 2 of 4)	53085	553595	impa2	inositol(myo)-1(or 4)-monophosphatase 2	WT to +Krt5; Hyper
1.52649	chr12	1052648	1053771	Intergenic	-54336	336518	polr3e	polymerase (RNA) III (DNA directed) polypeptide E	WT to +Krt5; Hyper
1.52613	chr13	26644624	26645623	Exon (NM_212982, Exon 11 of 14)	23662	394145	vrk2	VRK serine/threonine kinase 2	WT to +Krt5; Hyper
1.52608	chr11	28687931	28688935	Intron (NM_001278321, Intron 1 of 9)	146568	569872	igsf21a	immunoglobin superfamily, member 21a	WT to +Krt5; Hyper
1.52588	chr7	58129777	58130776	Intergenic	-162903	407719	sdcbp	syndecan binding protein (syntenin)	WT to +Krt5; Hyper
1.52585	chr6	24120509	24121586	Intergenic	-2562	337110	si:ch211-181p13.2	si:ch211-181p13.2	WT to +Krt5; Hyper
1.52581	chr14	8938514	8939513	Intergenic	36205	445507	asb12b	ankyrin repeat and SOCS box-containing 12b	WT to +Krt5; Hyper
1.52567	chr21	4488285	4489321	Exon (NM_199901, Exon 26 of 29)	42143	334460	cdk5rap2	CDK5 regulatory subunit associated protein 2	WT to +Krt5; Hyper
1.52562	chr22	2057172	2058241	Intergenic	-26767	110437714	LOC110437714	zinc finger protein 729-like	WT to +Krt5; Hyper
1.52555	chr3	16026515	16027677	Intron (NM_001002652, Intron 6 of 12)	-35001	393819	arl5c	ADP-ribosylation factor-like 5C	WT to +Krt5; Hyper
1.52535	chr23	11836085	11837084	Intergenic	-301607	100148183	edn3b	endothelin 3b	WT to +Krt5; Hyper
1.52521	chr22	28412492	28413491	Intergenic	-83445	100149890	abi3bpb	ABI family, member 3 (NESH) binding protein b	WT to +Krt5; Hyper
1.52517	chr20	33784769	33785768	Intron (NM_001093747, Intron 5 of 30)	8647	557251	si:ch211-199m3.1	si:ch211-199m3.1	WT to +Krt5; Hyper
1.52484	chr4	54635327	54636348	Intergenic	151852	793688	si:dkey-65l23.2	si:dkey-65l23.2	WT to +Krt5; Hyper
1.52482	chr7	32061878	32062960	Intergenic	-35457	558825	lgr4	leucine-rich repeat containing G protein-coupled receptor 4	WT to +Krt5; Hyper
1.52473	chr13	35853515	35854514	Intergenic	-2885	768172	zgc:153911	zgc:153911	WT to +Krt5; Hyper
1.52469	chr20	6234237	6235236	Intron (NM_001316948, Intron 1 of 4)	233	570397	opn7a	opsin 7, group member a	WT to +Krt5; Hyper
1.52468	chr13	46528136	46529165	Intergenic	63615	563580	slc29a1a	solute carrier family 29 member 1a	WT to +Krt5; Hyper
1.52459	chr6	49985062	49986061	Promoter-TSS (NM_001128801)	-921	798574	asip1	agouti signaling protein 1	WT to +Krt5; Hyper
1.52445	chr5	9931042	9932129	Intergenic	-197144	100150220	si:ch73-42k18.1	si:ch73-42k18.1	WT to +Krt5; Hyper
1.52411	chr3	28548007	28549174	Intergenic	-14141	797939	fbxl16	F-box and leucine-rich repeat protein 16	WT to +Krt5; Hyper
1.52394	chr15	41987234	41988233	Intergenic	129426	436703	pxylp1	2-phosphoxylose phosphatase 1	WT to +Krt5; Hyper
1.52387	chr4	5786155	5787220	Promoter-TSS (NM_001007053)	16	474321	pgm3	phosphoglucomutase 3	WT to +Krt5; Hyper
1.5237	chr3	26678310	26679347	Intergenic	-3377	445073	socs1a	suppressor of cytokine signaling 1a	WT to +Krt5; Hyper
1.52363	chr2	10739516	10740515	Intron (NM_001365136, Intron 17 of 27)	40432	564276	ccdc18	coiled-coil domain containing 18	WT to +Krt5; Hyper
1.52358	chr17	38629517	38630516	Intron (NM_131525, Intron 1 of 35)	4097	58040	sptb	spectrin, beta, erythrocytic	WT to +Krt5; Hyper
1.52349	chr20	32288712	32289722	Intergenic	-3199	100034589	si:ch211-51a19.5	si:ch211-51a19.5	WT to +Krt5; Hyper
1.52343	chr20	35098048	35099054	Exon (NM_001025541, Exon 6 of 10)	10663	566273	cnstb	consortin, connexin sorting protein b	WT to +Krt5; Hyper
1.5234	chr16	3720370	3721695	Intergenic	-98067	195821	mtf1	metal-regulatory transcription factor 1	WT to +Krt5; Hyper
1.52328	chr6	54023747	54024746	Intergenic	46239	664772	hyal1	hyaluronidase 1	WT to +Krt5; Hyper
1.52318	chr23	5394781	5396059	Intergenic	99913	100033537	mirlet7a-5	microRNA let7a-5	WT to +Krt5; Hyper
1.52316	chr6	11861968	11863028	Intergenic	91282	777721	wdsub1	WD repeat, sterile alpha motif and U-box domain containing 1	WT to +Krt5; Hyper
1.52308	chr25	20959080	20960079	Intergenic	8903	333988	fbxl14a	F-box and leucine-rich repeat protein 14a	WT to +Krt5; Hyper
1.52305	chr9	2523600	2524599	Intergenic	-1483	326058	scrn3	secernin 3	WT to +Krt5; Hyper
1.52273	chr5	5202387	5204369	Intergenic	-452503	767667	mvb12ba	multivesicular body subunit 12Ba	WT to +Krt5; Hyper
1.52256	chr11	30434536	30435535	Intergenic	34683	557460	tpcn3	two pore segment channel 3	WT to +Krt5; Hyper
1.5223	chr21	43646608	43647621	Intergenic	-59726	613144	dkc1	dyskeratosis congenita 1, dyskerin	WT to +Krt5; Hyper
1.52177	chr17	661202	662253	Intergenic	-1706	407989	adssl1	adenylosuccinate synthase like 1	WT to +Krt5; Hyper
1.52173	chr1	24603105	24604628	Intergenic	75586	100003782	trim2a	tripartite motif containing 2a	WT to +Krt5; Hyper
1.5217	chr5	49486330	49487495	Intergenic	-55111	393390	fam172a	family with sequence similarity 172 member A	WT to +Krt5; Hyper
1.52167	chr22	10477100	10478099	Intron (NM_001003555, Intron 6 of 8)	-19770	65228	aspn	asporin (LRR class 1)	WT to +Krt5; Hyper
1.5214	chr19	8216344	8217343	Intergenic	-38784	100006223	si:dkey-266f7.9	si:dkey-266f7.9	WT to +Krt5; Hyper
1.52133	chr17	20755353	20756352	Intergenic	-79790	335905	ccdc6a	coiled-coil domain containing 6a	WT to +Krt5; Hyper
1.52117	chr9	24289594	24290912	Intergenic	19505	557725	tyw5	tRNA-yW synthesizing protein 5	WT to +Krt5; Hyper
1.5211	chr4	19109210	19110265	Intergenic	-51158	100033644	mir129-1	microRNA 129-1	WT to +Krt5; Hyper
1.52105	chr20	38468322	38469321	Intergenic	49256	562918	stum	stum, mechanosensory transduction mediator homolog	WT to +Krt5; Hyper
1.52087	chr6	906177	907203	Exon (NM_213183, Exon 3 of 14)	1050	406462	orc4	origin recognition complex, subunit 4	WT to +Krt5; Hyper
1.52081	chr18	20081265	20082264	Intergenic	36845	436877	morf4l1	mortality factor 4 like 1	WT to +Krt5; Hyper
1.52065	chr22	2863148	2864225	Exon (NM_001045862, Exon 2 of 4)	6994	436844	aqp12	aquaporin 12	WT to +Krt5; Hyper
1.52052	chr15	17122563	17123611	Intergenic	-15074	795480	clptm1	CLPTM1 regulator of GABA type A receptor forward trafficking	WT to +Krt5; Hyper
1.52035	chr19	24652978	24653977	Intergenic	29630	336965	s100v2	S100 calcium binding protein V2	WT to +Krt5; Hyper
1.52028	chr23	40137196	40138195	Intergenic	-42845	793334	ghrhrl	growth hormone releasing hormone receptor, like	WT to +Krt5; Hyper
1.52024	chr24	11673238	11674335	Intron (NM_205728, Intron 1 of 14)	7324	403042	gli3	GLI family zinc finger 3	WT to +Krt5; Hyper
1.51978	chr16	8051149	8052148	Intergenic	-15994	566425	ano10a	anoctamin 10a	WT to +Krt5; Hyper
1.51968	chr25	34719459	34721213	Intergenic	-25682	494492	slc17a6a	solute carrier family 17 member 6a	WT to +Krt5; Hyper
1.51966	chr6	37820429	37821428	Intergenic	-49111	450042	nipa1	NIPA magnesium transporter 1	WT to +Krt5; Hyper
1.51936	chr23	26332836	26333908	Intron (NM_001365193, Intron 11 of 20)	117300	565606	ptpn22	protein tyrosine phosphatase non-receptor type 22	WT to +Krt5; Hyper
1.51935	chr2	11497383	11498382	Intergenic	75686	378959	lhx8a	LIM homeobox 8a	WT to +Krt5; Hyper
1.51906	chr16	12933978	12934977	Intergenic	12095	557103	u2af2a	U2 small nuclear RNA auxiliary factor 2a	WT to +Krt5; Hyper
1.51897	chr25	28387763	28388762	Intron (NM_001013322, Intron 4 of 6)	7504	503744	nfybb	nuclear transcription factor Y, beta b	WT to +Krt5; Hyper
1.51876	chr7	61450288	61451310	Intergenic	-3079	406421	acox3	acyl-CoA oxidase 3, pristanoyl	WT to +Krt5; Hyper
1.51866	chr6	30830991	30832020	Intergenic	114420	566602	insl5a	insulin-like 5a	WT to +Krt5; Hyper
1.51856	chr5	51313908	51314921	Exon (NM_213514, Exon 6 of 12)	37464	406835	serinc5	serine incorporator 5	WT to +Krt5; Hyper
1.51835	chr22	28631046	28632045	Intergenic	64055	445190	jagn1b	jagunal homolog 1b	WT to +Krt5; Hyper
1.51828	chr5	66910739	66912433	Intron (NM_001080604, Intron 1 of 3)	70690	568779	zbtb20	zinc finger and BTB domain containing 20	WT to +Krt5; Hyper
1.51809	chr22	10957953	10959135	Intron (NM_001123229, Intron 2 of 20)	64922	245700	insrb	insulin receptor b	WT to +Krt5; Hyper
1.51805	chr6	22656049	22657048	Intergenic	-85572	100002239	si:rp71-81e14.2	si:rp71-81e14.2	WT to +Krt5; Hyper
1.51804	chr2	3273531	3274530	Intron (NM_001007185, Intron 3 of 4)	-38982	114428	arf1	ADP-ribosylation factor 1	WT to +Krt5; Hyper
1.51797	chr23	4135072	4136587	Intergenic	52110	724080	b4galt5	UDP-Gal:betaGlcNAc beta 1,4- galactosyltransferase, polypeptide 5	WT to +Krt5; Hyper
1.51795	chr7	59526802	59527801	Intergenic	155241	450066	trmt44	tRNA methyltransferase 44 homolog	WT to +Krt5; Hyper
1.51784	chr19	6314269	6315268	Intergenic	-40658	560416	erf	Ets2 repressor factor	WT to +Krt5; Hyper
1.51778	chr10	28458071	28459101	Intron (NM_001005391, Intron 6 of 30)	23761	323579	cltca	clathrin, heavy chain a (Hc)	WT to +Krt5; Hyper
1.51739	chr11	7092712	7093711	Intergenic	36505	30584	bmp7a	bone morphogenetic protein 7a	WT to +Krt5; Hyper
1.5172	chr1	23639852	23640872	Intergenic	-24330	337240	rps3a	ribosomal protein S3A	WT to +Krt5; Hyper
1.51699	chr14	12737763	12738762	Intergenic	-207224	368416	gria3b	glutamate receptor, ionotropic, AMPA 3b	WT to +Krt5; Hyper
1.51684	chr3	17776939	17778101	Exon (NM_200316, Exon 11 of 12)	16691	393286	ttc25	tetratricopeptide repeat domain 25	WT to +Krt5; Hyper
1.5168	chr8	1052072	1053444	Intron (NM_001328062, Intron 1 of 5)	173	402829	ubox5	U-box domain containing 5	WT to +Krt5; Hyper
1.51679	chr23	2906694	2907693	Intron (NM_194407, Intron 17 of 29)	29302	386659	zhx3	zinc fingers and homeoboxes 3	WT to +Krt5; Hyper
1.51647	chr21	38036326	38037325	Intron (NM_001080003, Intron 2 of 5)	51140	562805	klf8	Kruppel-like factor 8	WT to +Krt5; Hyper
1.51638	chr7	43978348	43979524	Intergenic	-127434	445471	cdh5	cadherin 5	WT to +Krt5; Hyper
1.51632	chr11	2499519	2500518	Intergenic	14516	553745	zgc:113184	zgc:113184	WT to +Krt5; Hyper
1.51631	chr6	53489614	53490613	Intergenic	61264	393338	abhd14b	abhydrolase domain containing 14B	WT to +Krt5; Hyper
1.51624	chr5	16491279	16492278	Intergenic	-261712	368672	atad1a	ATPase family AAA domain containing 1a	WT to +Krt5; Hyper
1.51602	chr3	15219227	15220233	Intron (NM_001110455, Intron 2 of 7)	8651	558152	sh2b1	SH2B adaptor protein 1	WT to +Krt5; Hyper
1.51598	chr7	540965	541996	Intergenic	74950	321681	drap1	DR1-associated protein 1 (negative cofactor 2 alpha)	WT to +Krt5; Hyper
1.51583	chr5	23989409	23990408	Intergenic	23992	323447	tia1l	cytotoxic granule-associated RNA binding protein 1, like	WT to +Krt5; Hyper
1.51578	chr8	42420479	42421478	Intergenic	-189222	405794	gfra2a	GDNF family receptor alpha 2a	WT to +Krt5; Hyper
1.51576	chr13	35534230	35535460	Intergenic	100240	368331	erlec1	endoplasmic reticulum lectin 1	WT to +Krt5; Hyper
1.5157	chr7	51390168	51391321	Intron (NM_213431, Intron 10 of 10)	-17065	793303	cited1	Cbp/p300-interacting transactivator, with Glu/Asp-rich carboxy-terminal domain, 1	WT to +Krt5; Hyper
1.51566	chr8	44727246	44728245	Intergenic	17795	63999	star	steroidogenic acute regulatory protein	WT to +Krt5; Hyper
1.51561	chr3	32774063	32775062	Intergenic	-4132	767644	kat7a	K(lysine) acetyltransferase 7a	WT to +Krt5; Hyper
1.51558	chr3	29584302	29585301	Intron (NM_200641, Intron 1 of 3)	868	393614	cacng2a	calcium channel, voltage-dependent, gamma subunit 2a	WT to +Krt5; Hyper
1.51554	chr22	15002146	15003198	Intron (NM_001365944, Intron 3 of 3)	180198	103909578	elfn2a	extracellular leucine-rich repeat and fibronectin type III domain containing 2a	WT to +Krt5; Hyper
1.51548	chr9	44426416	44427415	Intron (NM_001089474, Intron 2 of 12)	60979	100037318	cerkl	ceramide kinase-like	WT to +Krt5; Hyper
1.51535	chr3	44184852	44185851	Intergenic	-72255	550483	znf750	zinc finger protein 750	WT to +Krt5; Hyper
1.51534	chr13	26419299	26420318	Intergenic	153552	103912006	si:rp71-1h3.1	si:rp71-1h3.1	WT to +Krt5; Hyper
1.51531	chr3	37889081	37890080	Intron (NM_214788, Intron 4 of 12)	207170	407669	asic2	acid-sensing (proton-gated) ion channel 2	WT to +Krt5; Hyper
1.5152	chr22	5602587	5603588	TTS (NM_173257)	21850	192338	mcm2	minichromosome maintenance complex component 2	WT to +Krt5; Hyper
1.51507	chr8	28456746	28457745	Intergenic	23360	678609	slc52a3	solute carrier family 52 member 3	WT to +Krt5; Hyper
1.51472	chr16	30653924	30654943	3' UTR (NM_001013340, Exon 4 of 4)	7932	503762	fam210ab	family with sequence similarity 210 member Ab	WT to +Krt5; Hyper
1.51471	chr8	10513995	10515191	Intergenic	247277	572469	pim1	Pim-1 proto-oncogene, serine/threonine kinase	WT to +Krt5; Hyper
1.5145	chr10	28858863	28859862	Intron (NM_131000, Intron 8 of 15)	89783	30194	alcama	activated leukocyte cell adhesion molecule a	WT to +Krt5; Hyper
1.51437	chr1	52958968	52959967	Intergenic	-89602	692293	commd1	copper metabolism (Murr1) domain containing 1	WT to +Krt5; Hyper
1.51427	chr11	10672419	10673430	Intergenic	115358	336526	b3gnt5a	UDP-GlcNAc:betaGal beta-1,3-N-acetylglucosaminyltransferase 5a	WT to +Krt5; Hyper
1.51421	chr6	19807506	19808505	Intron (NM_001326568, Intron 4 of 6)	5039	570260	si:dkey-19e4.5	si:dkey-19e4.5	WT to +Krt5; Hyper
1.51415	chr2	11436796	11437812	Intergenic	15108	378959	lhx8a	LIM homeobox 8a	WT to +Krt5; Hyper
1.51411	chr15	1523914	1524913	Intron (NM_001017906, Intron 7 of 7)	44910	494082	ift80	intraflagellar transport 80 homolog (Chlamydomonas)	WT to +Krt5; Hyper
1.51403	chr17	46194625	46195794	Intergenic	370308	100033770	mir203a	microRNA 203a	WT to +Krt5; Hyper
1.51378	chr13	3158276	3159322	Intergenic	39199	559209	prph2b	peripherin 2b (retinal degeneration, slow)	WT to +Krt5; Hyper
1.5135	chr18	46658599	46660075	Intron (NM_001013504, Intron 1 of 2)	26994	541377	pid1	phosphotyrosine interaction domain containing 1	WT to +Krt5; Hyper
1.51345	chr20	38710337	38711367	Intergenic	-3371	563540	slc30a2	solute carrier family 30 member 2	WT to +Krt5; Hyper
1.51333	chr5	70316405	70317404	Intergenic	371217	100334375	brinp1	bone morphogenetic protein/retinoic acid inducible neural-specific 1	WT to +Krt5; Hyper
1.51319	chr23	9691339	9692338	Intron (NM_001039171, Intron 38 of 79)	65833	796450	adrm1	adhesion regulating molecule 1	WT to +Krt5; Hyper
1.51285	chr18	46290193	46291192	Intergenic	65300	30559	foxa3	forkhead box A3	WT to +Krt5; Hyper
1.51281	chr16	6403905	6404950	Exon (NM_001080645, Exon 3 of 6)	8153	791163	cmtm8b	CKLF-like MARVEL transmembrane domain containing 8b	WT to +Krt5; Hyper
1.51277	chr7	46214973	46215972	Intergenic	293464	565811	tshz3b	teashirt zinc finger homeobox 3b	WT to +Krt5; Hyper
1.51273	chr20	14801125	14802124	Intergenic	-16763	558306	scrn2	secernin 2	WT to +Krt5; Hyper
1.51272	chr10	15657818	15658817	Intergenic	13354	393923	zfand5b	zinc finger, AN1-type domain 5b	WT to +Krt5; Hyper
1.51263	chr3	13361483	13362556	Intergenic	-2848	403024	slc25a19	solute carrier family 25 member 19	WT to +Krt5; Hyper
1.5126	chr15	45250501	45251500	Intergenic	-82859	100333015	dync2h1	dynein cytoplasmic 2 heavy chain 1	WT to +Krt5; Hyper
1.51251	chr24	31282122	31283121	Intron (NM_001006092, Intron 2 of 3)	3373	450072	alg14	ALG14 UDP-N-acetylglucosaminyltransferase subunit	WT to +Krt5; Hyper
1.51223	chr15	1686358	1687386	Promoter-TSS (NM_001320183)	-15	767640	ppm1lb	protein phosphatase, Mg2+/Mn2+ dependent, 1Lb	WT to +Krt5; Hyper
1.51219	chr2	38524737	38525736	Intergenic	134291	30387	psmb5	proteasome subunit beta 5	WT to +Krt5; Hyper
1.51212	chr22	9859940	9861267	Intergenic	5911	100189617	LOC100189617	uncharacterized LOC100189617	WT to +Krt5; Hyper
1.51185	chr9	38954380	38955379	Intergenic	36177	795861	tas2r3	taste receptor, type 2, member 3	WT to +Krt5; Hyper
1.51182	chr5	10935911	10937079	Intergenic	29358	553704	zgc:112294	zgc:112294	WT to +Krt5; Hyper
1.51167	chr17	47939467	47940499	Intergenic	-101472	541413	slc39a9	solute carrier family 39 member 9	WT to +Krt5; Hyper
1.51143	chr14	2262285	2263500	Intron (NM_001009585, Intron 1 of 3)	5959	493600	pcdh2ab12	protocadherin 2 alpha b 12	WT to +Krt5; Hyper
1.51142	chr12	42930335	42931369	Intergenic	649701	567751	ebf3a	EBF transcription factor 3a	WT to +Krt5; Hyper
1.51137	chr2	39583313	39584335	TTS (NM_001159839)	-69570	664693	zgc:136870	zgc:136870	WT to +Krt5; Hyper
1.51132	chr16	7556869	7557868	Intergenic	-31342	323473	prdm1a	PR domain containing 1a, with ZNF domain	WT to +Krt5; Hyper
1.51124	chr18	46926642	46927641	Intergenic	-161989	100332110	dner	delta/notch-like EGF repeat containing	WT to +Krt5; Hyper
1.51119	chr12	14185418	14186676	Intron (NM_001083009, Intron 3 of 12)	9595	100009640	mto1	mitochondrial tRNA translation optimization 1	WT to +Krt5; Hyper
1.51087	chr7	19422053	19423052	Intergenic	-59604	794380	zgc:194655	zgc:194655	WT to +Krt5; Hyper
1.51045	chr14	1127762	1128761	Intergenic	-24443	386589	hopx	HOP homeobox	WT to +Krt5; Hyper
1.51022	chr17	48182808	48183807	Intergenic	28146	100529120	smoc1	SPARC related modular calcium binding 1	WT to +Krt5; Hyper
1.51014	chr11	43860368	43861679	Promoter-TSS (NM_001077318)	-95	768175	clcn4	chloride channel, voltage-sensitive 4	WT to +Krt5; Hyper
1.51004	chr15	42393204	42394329	Intergenic	-66319	493608	farsb	phenylalanyl-tRNA synthetase subunit beta	WT to +Krt5; Hyper
1.51	chr16	37865861	37866860	Intergenic	-75390	562035	cep162	centrosomal protein 162	WT to +Krt5; Hyper
1.50998	chr8	25224367	25225366	Intergenic	-8402	140429	gnat2	guanine nucleotide binding protein (G protein), alpha transducing activity polypeptide 2	WT to +Krt5; Hyper
1.50991	chr6	14358316	14359706	Intergenic	-196141	792527	inpp4ab	inositol polyphosphate-4-phosphatase type I Ab	WT to +Krt5; Hyper
1.50982	chr6	21389797	21391209	Intergenic	337238	559662	ppp1r27b	protein phosphatase 1, regulatory subunit 27b	WT to +Krt5; Hyper
1.50978	chr17	30281268	30282267	Intergenic	93472	799739	spata17	spermatogenesis associated 17	WT to +Krt5; Hyper
1.50976	chr10	38410556	38411917	Intergenic	-62518	450018	samsn1b	SAM domain, SH3 domain and nuclear localisation signals 1b	WT to +Krt5; Hyper
1.50972	chr16	55039165	55040456	Exon (NM_001083575, Exon 2 of 7)	1979	799447	eomesb	eomesodermin homolog b	WT to +Krt5; Hyper
1.50967	chr18	46870529	46871528	Intergenic	-105876	100332110	dner	delta/notch-like EGF repeat containing	WT to +Krt5; Hyper
1.50966	chr9	39603214	39604220	Intergenic	-408212	336165	myl1	myosin, light chain 1, alkali; skeletal, fast	WT to +Krt5; Hyper
1.50959	chr7	19937951	19938963	Intergenic	-70024	323630	dvl2	dishevelled segment polarity protein 2	WT to +Krt5; Hyper
1.5095	chr12	23487013	23488012	Intergenic	184598	83496	bambia	BMP and activin membrane-bound inhibitor (Xenopus laevis) homolog a	WT to +Krt5; Hyper
1.50906	chr7	66667469	66668531	Intergenic	-14689	556502	adma	adrenomedullin a	WT to +Krt5; Hyper
1.50883	chr15	28464695	28465694	Intron (NM_200251, Intron 4 of 4)	-12639	393909	pitpnaa	phosphatidylinositol transfer protein, alpha a	WT to +Krt5; Hyper
1.5088	chr15	22681480	22682479	Intergenic	182251	562331	tlcd5a	TLC domain containing 5a	WT to +Krt5; Hyper
1.50875	chr7	43441084	43442092	Intron (NM_131214, Intron 5 of 10)	6648	30461	cdh11	cadherin 11, type 2, OB-cadherin (osteoblast)	WT to +Krt5; Hyper
1.50867	chr11	7655910	7656909	Intergenic	-255934	406676	adgrl4	adhesion G protein-coupled receptor L4	WT to +Krt5; Hyper
1.50852	chr17	29182595	29183625	Intergenic	49091	445119	traf3	TNF receptor-associated factor 3	WT to +Krt5; Hyper
1.50841	chr22	17734903	17735994	Intergenic	-24122	791179	tm6sf2	transmembrane 6 superfamily member 2	WT to +Krt5; Hyper
1.50837	chr22	36852222	36853269	Intergenic	-20386	103909643	LOC103909643	aminoacylase-1A-like	WT to +Krt5; Hyper
1.50812	chr3	24581611	24582613	Intergenic	30825	100093708	slc25a17	solute carrier family 25 member 17	WT to +Krt5; Hyper
1.50809	chr16	3446410	3447409	Intergenic	-216646	100134935	csf3r	colony stimulating factor 3 receptor (granulocyte)	WT to +Krt5; Hyper
1.50802	chr14	36348110	36349109	Intergenic	-49151	100008541	tdo2a	tryptophan 2,3-dioxygenase a	WT to +Krt5; Hyper
1.50801	chr3	28047412	28048411	Intergenic	-103058	449554	rbfox1	RNA binding fox-1 homolog 1	WT to +Krt5; Hyper
1.50796	chr19	37206931	37207930	Intergenic	-323997	402821	cx30.9	connexin 30.9	WT to +Krt5; Hyper
1.50787	chr12	6148857	6149856	Intergenic	-23517	100499491	rltgr	RAMP-like triterpene glycoside receptor	WT to +Krt5; Hyper
1.5078	chr15	19652879	19653878	Intergenic	-63715	436860	lim2.3	lens intrinsic membrane protein 2.3	WT to +Krt5; Hyper
1.50769	chr16	6323964	6324964	Intergenic	-19847	30265	ctnnb1	catenin (cadherin-associated protein), beta 1	WT to +Krt5; Hyper
1.5076	chr4	11569630	11570788	Intergenic	11723	493607	net1	neuroepithelial cell transforming 1	WT to +Krt5; Hyper
1.50732	chr9	24096671	24098086	Intergenic	7544	394070	trim63b	tripartite motif containing 63b	WT to +Krt5; Hyper
1.50723	chr12	42992508	42993507	Intergenic	665258	572187	dock1	dedicator of cytokinesis 1	WT to +Krt5; Hyper
1.50722	chr22	38611226	38612225	Intergenic	23427	570244	nppc	natriuretic peptide C	WT to +Krt5; Hyper
1.50702	chr7	33504275	33505826	Intergenic	-92437	100007463	tle3b	TLE family member 3, transcriptional corepressor b	WT to +Krt5; Hyper
1.507	chr8	51292526	51293525	Intron (NM_001040037, Intron 1 of 19)	13747	572452	bmp1a	bone morphogenetic protein 1a	WT to +Krt5; Hyper
1.50678	chr9	1998375	1999452	Intergenic	-2991	30479	evx2	even-skipped homeobox 2	WT to +Krt5; Hyper
1.50673	chr1	34407257	34408256	Intergenic	-54786	100002334	sc:d189	sc:d189	WT to +Krt5; Hyper
1.50654	chr3	45572804	45574007	Intergenic	-152452	767746	zgc:153426	zgc:153426	WT to +Krt5; Hyper
1.50645	chr18	27962937	27963936	Intron (NM_001080159, Intron 1 of 14)	14837	569156	hipk3b	homeodomain interacting protein kinase 3b	WT to +Krt5; Hyper
1.50635	chr3	23942623	23943622	3' UTR (NM_212855, Exon 6 of 6)	13205	326746	cbx1a	chromobox homolog 1a (HP1 beta homolog Drosophila)	WT to +Krt5; Hyper
1.5063	chr12	36981419	36982418	Intergenic	143011	678607	pmp22b	peripheral myelin protein 22b	WT to +Krt5; Hyper
1.50605	chr20	35519425	35520424	Intron (NM_001007366, Intron 2 of 3)	-10389	415157	sf3b6	splicing factor 3b, subunit 6	WT to +Krt5; Hyper
1.50602	chr14	18984343	18985342	Intergenic	-874497	259191	fmr1	fragile X mental retardation 1	WT to +Krt5; Hyper
1.506	chr3	25977041	25978040	Exon (NM_001089488, Exon 1 of 1)	940	100037333	zgc:162612	zgc:162612	WT to +Krt5; Hyper
1.50559	chr9	9628335	9629406	Intron (NM_131381, Intron 3 of 11)	64337	30654	gsk3ba	glycogen synthase kinase 3 beta, genome duplicate a	WT to +Krt5; Hyper
1.50521	chr11	42215942	42216941	Intron (NM_001045288, Intron 3 of 3)	12472	445196	arf4a	ADP-ribosylation factor 4a	WT to +Krt5; Hyper
1.505	chr14	29814846	29816144	Intergenic	-117086	450068	asah1a	N-acylsphingosine amidohydrolase (acid ceramidase) 1a	WT to +Krt5; Hyper
1.50497	chr16	6635760	6636759	Intergenic	-152121	572841	mboat1	membrane bound O-acyltransferase domain containing 1	WT to +Krt5; Hyper
1.50474	chr21	45193650	45194649	Intergenic	-24902	334582	vdac1	voltage-dependent anion channel 1	WT to +Krt5; Hyper
1.50467	chr15	3985114	3986113	Intron (NM_001302239, Intron 12 of 19)	-63919	334081	rnf168	ring finger protein 168	WT to +Krt5; Hyper
1.50464	chr2	38121337	38122336	Exon (NM_001347671, Exon 20 of 39)	13374	568214	chd8	chromodomain helicase DNA binding protein 8	WT to +Krt5; Hyper
1.50439	chr22	8673203	8674202	Intergenic	-697271	100142642	sc:d217	sc:d217	WT to +Krt5; Hyper
1.50402	chr11	40096500	40097580	Intron (NM_001080674, Intron 3 of 5)	57790	791192	trim62.1	tripartite motif containing 62, tandem duplicate 1	WT to +Krt5; Hyper
1.50399	chr5	3381747	3382746	Intergenic	-137779	368243	hspb1	heat shock protein, alpha-crystallin-related, 1	WT to +Krt5; Hyper
1.50378	chr22	2643440	2644826	Promoter-TSS (NM_001012491)	-132	503527	znf1162	zinc finger protein 1162	WT to +Krt5; Hyper
1.5034	chr7	48073838	48074918	Intergenic	27214	415102	crabp1b	cellular retinoic acid binding protein 1b	WT to +Krt5; Hyper
1.50339	chr19	15057260	15058259	Intergenic	41153	30509	oprd1a	opioid receptor, delta 1a	WT to +Krt5; Hyper
1.50325	chr16	19239912	19241007	Intron (NM_001098779, Intron 5 of 9)	16801	100073343	rapgef5b	Rap guanine nucleotide exchange factor (GEF) 5b	WT to +Krt5; Hyper
1.50299	chr5	67837191	67838310	Intergenic	-136056	30688	ephb4a	eph receptor B4a	WT to +Krt5; Hyper
1.50282	chr14	29389297	29390296	Intergenic	-45292	751702	zgc:153146	zgc:153146	WT to +Krt5; Hyper
1.50273	chr6	56459417	56460684	Intergenic	229122	100141481	ccl39.3	chemokine (C-C motif) ligand 39, duplicate 3	WT to +Krt5; Hyper
1.5027	chr4	26919979	26920978	Intergenic	189458	393495	creld2	cysteine-rich with EGF-like domains 2	WT to +Krt5; Hyper
1.50265	chr2	49123782	49124781	Intergenic	173300	436961	cdc34b	cell division cycle 34 homolog (S. cerevisiae) b	WT to +Krt5; Hyper
1.50264	chr25	12144921	12145984	Intergenic	-21584	568668	ntrk3a	neurotrophic tyrosine kinase, receptor, type 3a	WT to +Krt5; Hyper
1.50258	chr1	28592276	28593275	Intergenic	128672	569525	lig4	ligase IV, DNA, ATP-dependent	WT to +Krt5; Hyper
1.50232	chr2	45787112	45788176	Intergenic	23266	406810	prpf38b	pre-mRNA processing factor 38B	WT to +Krt5; Hyper
1.5022	chr13	32589121	32590120	Intron (NM_001002351, Intron 1 of 7)	6108	436624	pdss2	prenyl (decaprenyl) diphosphate synthase, subunit 2	WT to +Krt5; Hyper
1.502	chr16	41257645	41258644	Intergenic	45320	100142634	sc:d156	sc:d156	WT to +Krt5; Hyper
1.50183	chr6	11737514	11739473	Intergenic	-32723	777721	wdsub1	WD repeat, sterile alpha motif and U-box domain containing 1	WT to +Krt5; Hyper
1.501	chr3	37239096	37240237	Intergenic	190077	399477	arf2a	ADP-ribosylation factor 2a	WT to +Krt5; Hyper
1.50099	chr18	44836243	44837248	Intergenic	-19653	641490	arfgap2	ADP-ribosylation factor GTPase activating protein 2	WT to +Krt5; Hyper
1.50084	chr7	27736621	27737620	Intergenic	139999	280646	lmo1	LIM domain only 1	WT to +Krt5; Hyper
1.50081	chr21	20205891	20206959	Intergenic	79729	797431	zgc:86764	zgc:86764	WT to +Krt5; Hyper
1.5007	chr12	10879837	10880855	Intergenic	-162128	30680	raraa	retinoic acid receptor, alpha a	WT to +Krt5; Hyper
1.50064	chr15	25281959	25283836	Intron (NM_001003611, Intron 8 of 9)	50457	445217	mettl16	methyltransferase like 16	WT to +Krt5; Hyper
1.50063	chr5	56156442	56158280	Intergenic	97169	492468	ppm1db	protein phosphatase, Mg2+/Mn2+ dependent, 1Db	WT to +Krt5; Hyper
1.50059	chr25	33643612	33644611	Intergenic	26544	30542	foxb1a	forkhead box B1a	WT to +Krt5; Hyper
1.50023	chr2	17812916	17814337	Intergenic	-91900	407659	st3gal3b	ST3 beta-galactoside alpha-2,3-sialyltransferase 3b	WT to +Krt5; Hyper
1.50022	chr1	28904673	28905726	Intron (NM_001365587, Intron 2 of 15)	38572	100537632	spp2	secreted phosphoprotein 2	WT to +Krt5; Hyper
1.50019	chr18	157328	158327	Intergenic	-7163	280653	trpm7	transient receptor potential cation channel, subfamily M, member 7	WT to +Krt5; Hyper
1.50015	chr8	26884506	26885505	Intron (NM_001007304, Intron 7 of 7)	14364	492338	zmynd12	zinc finger, MYND-type containing 12	WT to +Krt5; Hyper
1.5001	chr19	13086556	13087555	Intergenic	-41563	393226	slc25a32a	solute carrier family 25 member 32a	WT to +Krt5; Hyper
1.50001	chr6	6504780	6505879	Promoter-TSS (NM_001014319)	19	541506	zgc:113227	zgc:113227	WT to +Krt5; Hyper
0.230948	chr7	66523800	66524807	Intergenic	-54239	100036549	ctr9	CTR9 homolog, Paf1/RNA polymerase II complex component	WT to +Krt5; Hypo
0.357305	chr19	39439746	39440745	Intergenic	605306	321212	col9a2	procollagen, type IX, alpha 2	WT to +Krt5; Hypo
0.369977	chr16	53618729	53619728	Intron (NM_001308611, Intron 4 of 6)	16370	394183	grinab	glutamate receptor, ionotropic, N-methyl D-aspartate-associated protein 1b (glutamate binding)	WT to +Krt5; Hypo
0.38738	chr3	28266524	28267523	Intergenic	267426	797939	fbxl16	F-box and leucine-rich repeat protein 16	WT to +Krt5; Hypo
0.394116	chr3	46553206	46554205	Intergenic	247869	563570	hs3st4	heparan sulfate (glucosamine) 3-O-sulfotransferase 4	WT to +Krt5; Hypo
0.396259	chr13	40355619	40356618	Intron (NM_001328528, Intron 4 of 9)	17288	562504	cnnm1	cyclin and CBS domain divalent metal cation transport mediator 1	WT to +Krt5; Hypo
0.403905	chr11	41170764	41171763	Intergenic	-55308	436642	akr7a3	aldo-keto reductase family 7, member A3 (aflatoxin aldehyde reductase)	WT to +Krt5; Hypo
0.413516	chr14	9224587	9225586	Intergenic	-8723	561606	atoh8	atonal bHLH transcription factor 8	WT to +Krt5; Hypo
0.433375	chr15	40781446	40782445	Intron (NM_001077577, Intron 2 of 28)	73938	569256	fat3a	FAT atypical cadherin 3a	WT to +Krt5; Hypo
0.435642	chr21	1374619	1375618	Intergenic	-185461	402898	wdr91	WD repeat domain 91	WT to +Krt5; Hypo
0.435789	chr11	17813043	17814042	Intergenic	16348	100136861	cishb	cytokine inducible SH2-containing protein b	WT to +Krt5; Hypo
0.438875	chr5	25745483	25746482	Intron (NM_001128534, Intron 5 of 15)	97755	100000223	si:ch211-214j8.1	si:ch211-214j8.1	WT to +Krt5; Hypo
0.439239	chr24	20793946	20794945	Intergenic	11662	336363	fam162a	family with sequence similarity 162 member A	WT to +Krt5; Hypo
0.443008	chr19	6667111	6668140	Intergenic	188319	560933	pvrl2l	PVR cell adhesion molecule related 2 like	WT to +Krt5; Hypo
0.446481	chr6	50192113	50193112	Intron (NM_205610, Intron 1 of 9)	12391	402903	raly	RALY heterogeneous nuclear ribonucleoprotein	WT to +Krt5; Hypo
0.448752	chr17	17452322	17453321	Intergenic	-24758	563598	nrxn3a	neurexin 3a	WT to +Krt5; Hypo
0.457274	chr4	25755397	25756396	Intron (NM_001277130, Intron 26 of 32)	40515	556605	lamb1b	laminin, beta 1b	WT to +Krt5; Hypo
0.459268	chr20	42653190	42654189	Intron (NM_001195281, Intron 2 of 4)	13031	799498	si:dkeyp-93d12.1	si:dkeyp-93d12.1	WT to +Krt5; Hypo
0.460206	chr7	68655456	68656455	Intergenic	-139463	324010	hnf4b	hepatic nuclear factor 4, beta	WT to +Krt5; Hypo
0.460257	chr1	50310853	50311852	Intergenic	-13757	399662	mdh1aa	malate dehydrogenase 1Aa, NAD (soluble)	WT to +Krt5; Hypo
0.460353	chr3	17258779	17259778	Intergenic	-128274	613239	hcrt	hypocretin (orexin) neuropeptide precursor	WT to +Krt5; Hypo
0.460702	chr6	46041168	46042167	Intergenic	-94457	325052	tardbp	TAR DNA binding protein	WT to +Krt5; Hypo
0.462864	chr14	21310437	21311436	Intron (NM_001030227, Intron 6 of 7)	9824	568927	reep2	receptor accessory protein 2	WT to +Krt5; Hypo
0.462935	chr25	7868647	7869646	Intron (NM_001135043, Intron 10 of 10)	10259	405870	ucmab	upper zone of growth plate and cartilage matrix associated b	WT to +Krt5; Hypo
0.467417	chr2	8623033	8624032	Intergenic	160296	492795	dipk2aa	divergent protein kinase domain 2Aa	WT to +Krt5; Hypo
0.469624	chr5	55796652	55797651	Intergenic	46486	573084	tbx2a	T-box 2a	WT to +Krt5; Hypo
0.471371	chr19	26205040	26206039	Intergenic	-16919	80959	pard6gb	par-6 family cell polarity regulator gamma b	WT to +Krt5; Hypo
0.473072	chr8	37946556	37947555	Intergenic	60038	654782	prlhr2a	prolactin releasing hormone receptor 2a	WT to +Krt5; Hypo
0.473205	chr16	7852701	7853700	Intron (NM_001301331, Intron 1 of 3)	22911	561754	trim71	tripartite motif containing 71, E3 ubiquitin protein ligase	WT to +Krt5; Hypo
0.477116	chr9	10983193	10984192	Intergenic	18127	101883500	si:dkey-22p6.2	si:dkey-22p6.2	WT to +Krt5; Hypo
0.478124	chr25	35354319	35355318	Intergenic	-29393	393397	lsm14aa	LSM14A mRNA processing body assembly factor a	WT to +Krt5; Hypo
0.478707	chr23	15916415	15917414	Intergenic	205888	436644	eef1a2	eukaryotic translation elongation factor 1 alpha 2	WT to +Krt5; Hypo
0.479418	chr6	17290392	17291391	Intergenic	-228542	100038772	zgc:162999	zgc:162999	WT to +Krt5; Hypo
0.480069	chr9	9564480	9565479	Exon (NM_001098617, Exon 5 of 9)	40406	565875	nr1i2	nuclear receptor subfamily 1, group I, member 2	WT to +Krt5; Hypo
0.480575	chr24	9082823	9083879	Intergenic	70181	321756	tgif1	TGFB-induced factor homeobox 1	WT to +Krt5; Hypo
0.48069	chr23	28717488	28718487	Intron (NM_131361, Intron 1 of 28)	48053	791181	ribc1	RIB43A domain with coiled-coils 1	WT to +Krt5; Hypo
0.481742	chr18	3283140	3284139	Intron (NM_201328, Intron 9 of 13)	29028	373103	pak1	p21 protein (Cdc42/Rac)-activated kinase 1	WT to +Krt5; Hypo
0.481747	chr7	52420067	52421066	Intergenic	-57437	556680	mtfmt	mitochondrial methionyl-tRNA formyltransferase	WT to +Krt5; Hypo
0.481913	chr5	19823660	19824659	Intron (NM_201295, Intron 1 of 10)	8415	317741	coro1ca	coronin, actin binding protein, 1Ca	WT to +Krt5; Hypo
0.482725	chr19	21938114	21939113	Intergenic	114227	369196	tshz1	teashirt zinc finger homeobox 1	WT to +Krt5; Hypo
0.484471	chr12	12869200	12870199	Intergenic	-210619	30208	cmn	calymmin	WT to +Krt5; Hypo
0.484877	chr7	49210232	49211402	Intergenic	167609	553656	hrasb	HRas proto-oncogene, GTPase b	WT to +Krt5; Hypo
0.485223	chr2	47500341	47501340	Intergenic	77860	30532	pax3a	paired box 3a	WT to +Krt5; Hypo
0.487683	chr6	57570675	57571674	Intergenic	-29116	100331274	itcha	itchy E3 ubiquitin protein ligase a	WT to +Krt5; Hypo
0.490617	chr15	3899222	3900221	Intron (NM_001080055, Intron 2 of 2)	21973	334081	rnf168	ring finger protein 168	WT to +Krt5; Hypo
0.490707	chr4	2026128	2027127	Intergenic	-36748	393262	pwp1	PWP1 homolog, endonuclein	WT to +Krt5; Hypo
0.491833	chr4	18733800	18734799	Intron (NM_001130612, Intron 10 of 10)	18715	100034473	atxn10	ataxin 10	WT to +Krt5; Hypo
0.493294	chr14	30609936	30610935	Intergenic	16535	100144554	il2rgb	interleukin 2 receptor, gamma b	WT to +Krt5; Hypo
0.493295	chr2	51202037	51203036	Exon (NM_001131052, Exon 4 of 13)	29368	541314	ghrhra	growth hormone releasing hormone receptor a	WT to +Krt5; Hypo
0.49355	chr9	27078799	27079920	Intergenic	-439535	561913	si:rp71-84d19.3	si:rp71-84d19.3	WT to +Krt5; Hypo
0.493892	chr5	63038743	63039902	Intron (NM_001256818, Intron 15 of 21)	51645	100333543	dnm1b	dynamin 1b	WT to +Krt5; Hypo
0.497698	chr5	27125074	27126073	Intergenic	141931	541345	tcima	transcriptional and immune response regulator a	WT to +Krt5; Hypo
0.498774	chr6	32633619	32634618	Intergenic	84710	100000492	mafaa	v-maf avian musculoaponeurotic fibrosarcoma oncogene homolog Aa	WT to +Krt5; Hypo
0.49942	chr1	23709859	23710858	Exon (NM_001020773, Exon 15 of 20)	24793	563255	zgc:171517	zgc:171517	WT to +Krt5; Hypo
0.500148	chr13	605998	606997	Intron (NM_001290176, Intron 1 of 19)	3761	555686	nrxn1b	neurexin 1b	WT to +Krt5; Hypo
0.501175	chr20	53787105	53788104	Intergenic	15518	386711	myh6	myosin, heavy chain 6, cardiac muscle, alpha	WT to +Krt5; Hypo
0.501324	chr4	22662017	22663016	Intron (NM_001003444, Intron 1 of 3)	17838	445050	lhfpl3	LHFPL tetraspan subfamily member 3	WT to +Krt5; Hypo
0.501846	chr7	51980889	51981888	Intron (NM_213018, Intron 17 of 19)	97384	406291	katnb1	katanin p80 (WD repeat containing) subunit B 1	WT to +Krt5; Hypo
0.502573	chr16	38573840	38574839	Intron (NM_001281990, Intron 1 of 4)	29350	566054	rspo2	R-spondin 2	WT to +Krt5; Hypo
0.502757	chr6	14519160	14520159	Intergenic	-303351	30321	pou3f3b	POU class 3 homeobox 3b	WT to +Krt5; Hypo
0.502766	chr19	24769072	24770071	Intergenic	-40766	100034657	si:dkey-81h8.1	si:dkey-81h8.1	WT to +Krt5; Hypo
0.503005	chr2	9042541	9043540	Intergenic	34850	567022	zzz3	zinc finger, ZZ-type containing 3	WT to +Krt5; Hypo
0.50425	chr6	49854424	49855423	Intergenic	-28288	558552	tubb1	tubulin, beta 1 class VI	WT to +Krt5; Hypo
0.504513	chr11	41050291	41051290	Intergenic	-175781	436642	akr7a3	aldo-keto reductase family 7, member A3 (aflatoxin aldehyde reductase)	WT to +Krt5; Hypo
0.506112	chr23	35774177	35775176	Intergenic	-45051	30606	rarga	retinoic acid receptor gamma a	WT to +Krt5; Hypo
0.507121	chr21	20451678	20452677	Intergenic	91922	450001	zgc:103482	zgc:103482	WT to +Krt5; Hypo
0.50713	chr14	35166925	35167924	Intergenic	-2256	768187	mrpl18	mitochondrial ribosomal protein L18	WT to +Krt5; Hypo
0.507218	chr11	17708732	17709731	Intergenic	-40795	406776	uba3	ubiquitin-like modifier activating enzyme 3	WT to +Krt5; Hypo
0.507831	chr1	27099675	27100674	Intergenic	-15028	692285	pspc1	paraspeckle component 1	WT to +Krt5; Hypo
0.508329	chr4	29387661	29388660	Intron (NM_001328702, Intron 1 of 2)	345208	571594	si:dkey-13e3.1	si:dkey-13e3.1	WT to +Krt5; Hypo
0.511115	chr18	11143585	11144584	Intergenic	-117392	567512	tspan33b	tetraspanin 33b	WT to +Krt5; Hypo
0.511654	chr1	30860444	30861443	Exon (NM_001020494, Exon 8 of 12)	20266	552924	slc2a15b	solute carrier family 2 member 15b	WT to +Krt5; Hypo
0.513131	chr8	306905	307904	Intron (NM_001037698, Intron 4 of 12)	14134	568737	snx2	sorting nexin 2	WT to +Krt5; Hypo
0.513883	chr17	9880694	9881693	Exon (NM_001365143, Exon 25 of 28)	-12003	403001	cfl2	cofilin 2 (muscle)	WT to +Krt5; Hypo
0.515741	chr19	36586843	36587842	Intergenic	374769	114408	angpt2b	angiopoietin 2b	WT to +Krt5; Hypo
0.515807	chr7	68632427	68633547	Intergenic	-162431	324010	hnf4b	hepatic nuclear factor 4, beta	WT to +Krt5; Hypo
0.515917	chr20	50915668	50916667	Intergenic	-118144	100007749	gphnb	gephyrin b	WT to +Krt5; Hypo
0.515941	chr16	4808526	4809525	Intron (NM_199216, Intron 1 of 11)	2275	387527	cyp4t8	cytochrome P450, family 4, subfamily T, polypeptide 8	WT to +Krt5; Hypo
0.516964	chr19	23113526	23114525	Intergenic	-29817	569382	trhrb	thyrotropin-releasing hormone receptor b	WT to +Krt5; Hypo
0.517202	chr20	21620326	21621325	Intergenic	-74746	317734	esr2a	estrogen receptor 2a	WT to +Krt5; Hypo
0.517258	chr1	9240337	9241336	Intron (NM_001145568, Intron 10 of 11)	15547	559126	tmem8a	transmembrane protein 8A	WT to +Krt5; Hypo
0.518736	chr18	46779278	46780361	Intergenic	-14667	100332110	dner	delta/notch-like EGF repeat containing	WT to +Krt5; Hypo
0.518868	chr6	50065430	50066512	Intron (NM_205610, Intron 2 of 9)	68843	324365	eif2s2	eukaryotic translation initiation factor 2, subunit 2 beta	WT to +Krt5; Hypo
0.518981	chr5	14392335	14393635	Intergenic	-308973	561895	sema4c	sema domain, immunoglobulin domain (Ig), transmembrane domain (TM) and short cytoplasmic domain, (semaphorin) 4C	WT to +Krt5; Hypo
0.519061	chr23	36626728	36627727	3' UTR (NM_200281, Exon 6 of 6)	18938	393251	tspan31	tetraspanin 31	WT to +Krt5; Hypo
0.519353	chr9	39073446	39074445	Intergenic	121560	336165	myl1	myosin, light chain 1, alkali; skeletal, fast	WT to +Krt5; Hypo
0.520046	chr20	39961675	39962694	Intron (NM_001351706, Intron 4 of 6)	-75783	567287	rnf217	ring finger protein 217	WT to +Krt5; Hypo
0.520077	chr14	28650914	28651913	Intergenic	-391133	566735	insb	preproinsulin b	WT to +Krt5; Hypo
0.520166	chr8	42624785	42625784	Intron (NM_001018128, Intron 3 of 5)	2338	553182	crybb2	crystallin, beta B2	WT to +Krt5; Hypo
0.520751	chr10	3139935	3140946	Intergenic	35867	359828	hic2	hypermethylated in cancer 2	WT to +Krt5; Hypo
0.521053	chr2	43593926	43594925	Intergenic	-25398	402973	nrp1b	neuropilin 1b	WT to +Krt5; Hypo
0.521105	chr18	10350566	10351565	Intergenic	-21727	566572	lrrc4.2	leucine rich repeat containing 4.2	WT to +Krt5; Hypo
0.522243	chr18	30563567	30564566	Intron (NM_001002514, Intron 4 of 6)	-25670	436895	irf8	interferon regulatory factor 8	WT to +Krt5; Hypo
0.52245	chr21	16026576	16027575	Intergenic	-20588	564476	zgc:193801	zgc:193801	WT to +Krt5; Hypo
0.52304	chr13	14019547	14020599	Intron (NM_001353962, Intron 26 of 28)	144932	794975	atrn	attractin	WT to +Krt5; Hypo
0.523094	chr15	37305131	37306130	Intergenic	-124362	100003031	zgc:171592	zgc:171592	WT to +Krt5; Hypo
0.523443	chr3	31355423	31356422	Intergenic	-112968	393631	ccdc43	coiled-coil domain containing 43	WT to +Krt5; Hypo
0.524071	chr25	24438598	24439597	Intergenic	286397	541385	tmem86a	transmembrane protein 86A	WT to +Krt5; Hypo
0.525227	chr11	18619084	18620083	Intergenic	37074	564764	zgc:175264	zgc:175264	WT to +Krt5; Hypo
0.525578	chr13	48956683	48957682	Intergenic	-78315	556657	tsnax	translin-associated factor X	WT to +Krt5; Hypo
0.525698	chr5	55528115	55529114	Intergenic	-70013	30454	lhx1b	LIM homeobox 1b	WT to +Krt5; Hypo
0.525768	chr11	5632282	5633281	Intergenic	-15589	563203	pex11g	peroxisomal biogenesis factor 11 gamma	WT to +Krt5; Hypo
0.525892	chr16	31504725	31505724	Intergenic	-10772	30502	csnk2a1	casein kinase 2, alpha 1 polypeptide	WT to +Krt5; Hypo
0.527108	chr2	28373256	28374255	Intergenic	-53910	393302	zgc:56556	zgc:56556	WT to +Krt5; Hypo
0.527126	chr23	36095029	36096028	Intron (NR_125800, Intron 2 of 4)	16227	58046	hoxc1a	homeobox C1a	WT to +Krt5; Hypo
0.527607	chr3	29055597	29056596	Intergenic	233663	405830	lgals2a	lectin, galactoside-binding, soluble, 2a	WT to +Krt5; Hypo
0.52795	chr14	30584642	30585641	Intergenic	41829	100144554	il2rgb	interleukin 2 receptor, gamma b	WT to +Krt5; Hypo
0.528224	chr2	34819623	34820622	Intergenic	-314048	100037391	cop1	COP1 E3 ubiquitin ligase	WT to +Krt5; Hypo
0.528868	chr5	51067884	51068883	Intergenic	41146	550224	lhfpl2b	LHFPL tetraspan subfamily member 2b	WT to +Krt5; Hypo
0.529262	chr9	6633116	6634115	Intron (NM_001143933, Intron 3 of 3)	6467	553393	si:dkeyp-118h3.6	si:dkeyp-118h3.6	WT to +Krt5; Hypo
0.529482	chr14	34191091	34192714	Intergenic	17802	387258	foxi3b	forkhead box I3b	WT to +Krt5; Hypo
0.529686	chr9	1155594	1156593	Intergenic	-5223	100537567	sctr	secretin receptor	WT to +Krt5; Hypo
0.52976	chr6	37946368	37947393	Intergenic	-175063	450042	nipa1	NIPA magnesium transporter 1	WT to +Krt5; Hypo
0.530017	chr16	50206494	50207493	Intergenic	-182107	406271	etfb	electron transfer flavoprotein subunit beta	WT to +Krt5; Hypo
0.5301	chr6	57032446	57033445	Intergenic	-343773	100141481	ccl39.3	chemokine (C-C motif) ligand 39, duplicate 3	WT to +Krt5; Hypo
0.531066	chr21	26087000	26087999	Intergenic	-9316	436937	nipal4	NIPA like domain containing 4	WT to +Krt5; Hypo
0.53121	chr15	35634960	35635959	Intergenic	240057	567225	zgc:158328	zgc:158328	WT to +Krt5; Hypo
0.531251	chr8	33407543	33408542	Intergenic	-35361	554360	lmx1bb	LIM homeobox transcription factor 1, beta b	WT to +Krt5; Hypo
0.532214	chr16	17557402	17558401	Intergenic	111703	373118	casp2	caspase 2, apoptosis-related cysteine peptidase	WT to +Krt5; Hypo
0.532233	chr20	8889798	8890990	Intergenic	244913	561225	mysm1	Myb-like, SWIRM and MPN domains 1	WT to +Krt5; Hypo
0.533617	chr12	11138254	11139253	Intron (NM_001098181, Intron 11 of 29)	9169	563454	vps35l	VPS35 endosomal protein sorting factor like	WT to +Krt5; Hypo
0.533663	chr3	19024599	19025598	Exon (NM_001089553, Exon 7 of 18)	25592	100038773	rfx1a	regulatory factor X, 1a (influences HLA class II expression)	WT to +Krt5; Hypo
0.533846	chr18	32069986	32070985	Intergenic	-43980	641487	zgc:123060	zgc:123060	WT to +Krt5; Hypo
0.535165	chr23	34215595	34216594	Intron (NM_001005584, Intron 7 of 7)	95175	449542	chchd6a	coiled-coil-helix-coiled-coil-helix domain containing 6a	WT to +Krt5; Hypo
0.535714	chr18	16629645	16630644	Intergenic	-96616	334618	eif4g2b	eukaryotic translation initiation factor 4, gamma 2b	WT to +Krt5; Hypo
0.535864	chr21	13615090	13616089	Intron (NM_001128783, Intron 4 of 8)	-21624	30333	pou5f3	POU domain, class 5, transcription factor 3	WT to +Krt5; Hypo
0.535884	chr16	14046534	14047533	Intergenic	-15738	335650	rcvrn2	recoverin 2	WT to +Krt5; Hypo
0.536153	chr5	66869653	66870652	Intron (NM_001080604, Intron 2 of 3)	-49238	553498	si:dkey-251i10.3	si:dkey-251i10.3	WT to +Krt5; Hypo
0.537128	chr11	44344395	44345394	3' UTR (NM_001039989, Exon 17 of 17)	5627	562429	nid1b	nidogen 1b	WT to +Krt5; Hypo
0.53744	chr20	4849435	4850434	Intron (NM_001160014, Intron 2 of 3)	7549	569632	tmem242	transmembrane protein 242	WT to +Krt5; Hypo
0.538047	chr23	43049053	43050112	Intergenic	128768	450006	myl9a	myosin, light chain 9a, regulatory	WT to +Krt5; Hypo
0.538724	chr8	51660306	51661305	Intergenic	-11404	30713	npy8br	neuropeptide Y receptor Y8b	WT to +Krt5; Hypo
0.538949	chr7	20501909	20502908	Intergenic	35927	795592	cyb5d1	cytochrome b5 domain containing 1	WT to +Krt5; Hypo
0.5399	chr25	10278461	10279460	Intergenic	-40896	568223	ehf	ets homologous factor	WT to +Krt5; Hypo
0.54035	chr18	47875341	47876340	Intergenic	-297514	572522	smtla	somatolactin alpha	WT to +Krt5; Hypo
0.540645	chr11	4870590	4871756	Intergenic	-63412	561197	ptprga	protein tyrosine phosphatase receptor type Ga	WT to +Krt5; Hypo
0.541006	chr15	43278271	43279270	Intron (NM_001017720, Intron 2 of 4)	4843	550415	ap1s3a	adaptor related protein complex 1 subunit sigma 3a	WT to +Krt5; Hypo
0.541036	chr13	26965900	26966899	Intergenic	55960	557389	soul2	heme-binding protein soul2	WT to +Krt5; Hypo
0.541283	chr10	32334740	32335739	Intron (NM_201069, Intron 14 of 14)	174756	30283	wnt11r	wingless-type MMTV integration site family, member 11, related	WT to +Krt5; Hypo
0.542014	chr13	7552192	7553191	Intergenic	-117299	558711	h2afy2	H2A histone family, member Y2	WT to +Krt5; Hypo
0.54228	chr8	51624335	51625334	Intergenic	-12194	541442	kctd9a	potassium channel tetramerization domain containing 9a	WT to +Krt5; Hypo
0.542611	chr1	36399573	36400572	Intergenic	-44063	562171	nr3c2	nuclear receptor subfamily 3, group C, member 2	WT to +Krt5; Hypo
0.542923	chr4	2515475	2516474	Intergenic	-35961	100148543	zdhhc17	zinc finger, DHHC-type containing 17	WT to +Krt5; Hypo
0.543596	chr2	19314300	19315299	Intergenic	-24547	100000775	glula	glutamate-ammonia ligase (glutamine synthase) a	WT to +Krt5; Hypo
0.543873	chr17	50458665	50459664	Intergenic	-25870	30612	bmp4	bone morphogenetic protein 4	WT to +Krt5; Hypo
0.544262	chr4	11235504	11236503	Intergenic	61758	564029	tspan11	tetraspanin 11	WT to +Krt5; Hypo
0.544275	chr17	35087112	35088111	Intergenic	-61467	570669	asap2a	ArfGAP with SH3 domain, ankyrin repeat and PH domain 2a	WT to +Krt5; Hypo
0.544918	chr6	50889337	50890336	Intergenic	-158306	560242	pigu	phosphatidylinositol glycan anchor biosynthesis, class U	WT to +Krt5; Hypo
0.545148	chr19	41022069	41023068	Intron (NM_001365105, Intron 22 of 27)	171583	100033722	mir489	microRNA 489	WT to +Krt5; Hypo
0.545396	chr14	6723376	6724375	Intergenic	-18391	797938	hbegfa	heparin-binding EGF-like growth factor a	WT to +Krt5; Hypo
0.545733	chr7	68784845	68785844	Intergenic	-10074	324010	hnf4b	hepatic nuclear factor 4, beta	WT to +Krt5; Hypo
0.54577	chr19	6683352	6684409	Intergenic	172064	560933	pvrl2l	PVR cell adhesion molecule related 2 like	WT to +Krt5; Hypo
0.546062	chr5	8827077	8828076	Intergenic	-16068	394239	tal2	T-cell acute lymphocytic leukemia 2	WT to +Krt5; Hypo
0.546203	chr4	68243211	68244210	Intergenic	406913	565962	znf1117	zinc finger protein 1117	WT to +Krt5; Hypo
0.546404	chr14	9644154	9645153	Intron (NM_001142584, Intron 4 of 9)	309859	100149452	il1rapl2	interleukin 1 receptor accessory protein-like 2	WT to +Krt5; Hypo
0.546493	chr4	18597010	18598009	Intergenic	9066	402862	cdkn1ba	cyclin-dependent kinase inhibitor 1Ba	WT to +Krt5; Hypo
0.547449	chr16	1172918	1173917	Intergenic	305718	260351	sim1a	SIM bHLH transcription factor 1a	WT to +Krt5; Hypo
0.547574	chr17	15544992	15545991	Intergenic	-6573	558919	col10a1a	collagen, type X, alpha 1a	WT to +Krt5; Hypo
0.547643	chr16	50108661	50109660	Intergenic	-84274	406271	etfb	electron transfer flavoprotein subunit beta	WT to +Krt5; Hypo
0.547979	chr23	7181099	7182098	Intergenic	-21585	567865	slco4a1	solute carrier organic anion transporter family, member 4A1	WT to +Krt5; Hypo
0.548012	chr1	23476982	23478003	Intergenic	92035	117234	mab21l2	mab-21-like 2	WT to +Krt5; Hypo
0.54819	chr13	49082432	49083494	Intergenic	70995	335866	irf2bp2a	interferon regulatory factor 2 binding protein 2a	WT to +Krt5; Hypo
0.548444	chr5	27017180	27018179	Intergenic	92313	402843	sfrp1a	secreted frizzled-related protein 1a	WT to +Krt5; Hypo
0.548595	chr25	1248922	1249921	Intergenic	203053	406300	ciao2a	cytosolic iron-sulfur assembly component 2A	WT to +Krt5; Hypo
0.548713	chr12	3251594	3252906	Intergenic	62741	790919	g6pc3	glucose 6 phosphatase, catalytic, 3	WT to +Krt5; Hypo
0.548901	chr25	25266307	25267306	Intergenic	22156	641569	zgc:123278	zgc:123278	WT to +Krt5; Hypo
0.549519	chr16	42314436	42315435	Intergenic	-26847	561782	zgc:162160	zgc:162160	WT to +Krt5; Hypo
0.550018	chr5	7888676	7889715	Intron (NM_001128232, Intron 7 of 35)	12359	553375	spef2	sperm flagellar 2	WT to +Krt5; Hypo
0.55002	chr14	39006341	39007340	Intergenic	-316046	83413	glra4a	glycine receptor, alpha 4a	WT to +Krt5; Hypo
0.550154	chr9	15188483	15189482	Intergenic	264501	100005469	fn1a	fibronectin 1a	WT to +Krt5; Hypo
0.550226	chr5	71283672	71284671	Intergenic	-18942	352920	oxt	oxytocin	WT to +Krt5; Hypo
0.550317	chr6	11504574	11505748	Intergenic	-20195	561301	zswim2	zinc finger, SWIM-type containing 2	WT to +Krt5; Hypo
0.551328	chr4	13558432	13559431	Exon (NM_001044820, Exon 9 of 13)	-8974	553964	il22	interleukin 22	WT to +Krt5; Hypo
0.551466	chr5	47461875	47462874	Intergenic	-43106	406680	tmem161b	transmembrane protein 161B	WT to +Krt5; Hypo
0.551784	chr15	1849498	1850512	Intergenic	30234	558760	taf15	TAF15 RNA polymerase II, TATA box binding protein (TBP)-associated factor	WT to +Krt5; Hypo
0.551946	chr20	16675723	16676722	Intergenic	-64043	333952	tmem30ab	transmembrane protein 30Ab	WT to +Krt5; Hypo
0.552301	chr21	41236049	41237048	Intergenic	75951	30531	msx2b	muscle segment homeobox 2b	WT to +Krt5; Hypo
0.553297	chr18	8300025	8301024	Intergenic	27405	541416	arsa	arylsulfatase A	WT to +Krt5; Hypo
0.55347	chr12	47781924	47782923	Exon (NM_001276496, Exon 25 of 31)	52946	572258	polr3a	polymerase (RNA) III (DNA directed) polypeptide A	WT to +Krt5; Hypo
0.553757	chr3	49443568	49444567	Intergenic	-35729	570333	rcvrna	recoverin a	WT to +Krt5; Hypo
0.554193	chr3	16269009	16270068	Intergenic	-5703	393480	eftud2	elongation factor Tu GTP binding domain containing 2	WT to +Krt5; Hypo
0.55453	chr23	44424980	44425979	Intron (NM_214728, Intron 6 of 19)	42007	791141	zgc:158659	zgc:158659	WT to +Krt5; Hypo
0.554898	chr17	9596575	9597574	Intergenic	176919	406602	egln3	egl-9 family hypoxia-inducible factor 3	WT to +Krt5; Hypo
0.555449	chr14	32374978	32375977	Intergenic	28673	30529	sox3	SRY (sex determining region Y)-box 3	WT to +Krt5; Hypo
0.555481	chr7	67339268	67340267	Intergenic	94108	378961	rpl13	ribosomal protein L13	WT to +Krt5; Hypo
0.555639	chr9	18320133	18321186	Intergenic	112422	445082	dnajc15	DnaJ (Hsp40) homolog, subfamily C, member 15	WT to +Krt5; Hypo
0.555717	chr19	41575748	41576747	Intergenic	-6629	550321	asb4	ankyrin repeat and SOCS box containing 4	WT to +Krt5; Hypo
0.555895	chr22	11214996	11216169	Intergenic	101111	402921	bcor	BCL6 corepressor	WT to +Krt5; Hypo
0.556147	chr17	47877516	47878515	Intergenic	-163440	541413	slc39a9	solute carrier family 39 member 9	WT to +Krt5; Hypo
0.5563	chr15	865752	866751	TTS (NR_023333)	3612	556913	wu:fc20e06	wu:fc20e06	WT to +Krt5; Hypo
0.556394	chr6	18397289	18398425	Intergenic	123637	393677	aanat1	arylalkylamine N-acetyltransferase 1	WT to +Krt5; Hypo
0.556577	chr16	41215251	41216250	Intron (NM_001122612, Intron 4 of 6)	2926	100142634	sc:d156	sc:d156	WT to +Krt5; Hypo
0.556618	chr9	16508846	16509845	Intron (NM_001365172, Intron 3 of 16)	71929	795902	epha3	eph receptor A3	WT to +Krt5; Hypo
0.556876	chr12	6781152	6782151	Intron (NM_001012486, Intron 6 of 34)	90221	503521	pcdh15b	protocadherin-related 15b	WT to +Krt5; Hypo
0.556883	chr13	22136491	22137490	Intron (NM_205678, Intron 1 of 5)	2370	572909	myoz1a	myozenin 1a	WT to +Krt5; Hypo
0.557038	chr15	14235283	14236282	Intergenic	22187	569462	pnkp	polynucleotide kinase 3'-phosphatase	WT to +Krt5; Hypo
0.557132	chr6	57955766	57956765	Intron (NM_212908, Intron 4 of 8)	196153	405844	tox2	TOX high mobility group box family member 2	WT to +Krt5; Hypo
0.557378	chr17	3416992	3417991	Intron (NM_001126427, Intron 6 of 16)	67184	569320	sntg2	syntrophin, gamma 2	WT to +Krt5; Hypo
0.557556	chr6	30925402	30926401	Intergenic	208816	566602	insl5a	insulin-like 5a	WT to +Krt5; Hypo
0.557718	chr9	764962	765961	Intergenic	17108	399645	insig2	insulin induced gene 2	WT to +Krt5; Hypo
0.558218	chr18	49149444	49150443	Intergenic	-103669	492462	yif1b	Yip1 interacting factor homolog B (S. cerevisiae)	WT to +Krt5; Hypo
0.55864	chr20	42963868	42964867	Intergenic	-19659	561422	pimr110	Pim proto-oncogene, serine/threonine kinase, related 110	WT to +Krt5; Hypo
0.558978	chr18	6559418	6560417	Intron (NM_001244879, Intron 1 of 7)	7948	751761	fam168a	family with sequence similarity 168 member A	WT to +Krt5; Hypo
0.559066	chr1	49413761	49414760	Intron (NM_001024462, Intron 10 of 11)	-27354	563273	npnta	nephronectin a	WT to +Krt5; Hypo
0.559522	chr11	6395669	6396668	Intergenic	23698	393497	ndufa11	NADH:ubiquinone oxidoreductase subunit A11	WT to +Krt5; Hypo
0.559804	chr15	46764470	46765469	Intergenic	-16929	677752	gmfg	glia maturation factor, gamma	WT to +Krt5; Hypo
0.560256	chr9	56778619	56779935	Intron (NM_001077788, Intron 8 of 20)	12991	777744	rab3gap1	RAB3 GTPase activating protein subunit 1	WT to +Krt5; Hypo
0.561247	chr16	15544474	15545489	Intergenic	-47642	260350	has2	hyaluronan synthase 2	WT to +Krt5; Hypo
0.561261	chr7	16926364	16927363	Intron (NM_001017655, Intron 12 of 15)	-50446	494450	slc6a5	solute carrier family 6 member 5	WT to +Krt5; Hypo
0.561793	chr17	16146366	16147365	Intergenic	64359	571403	znf395a	zinc finger protein 395a	WT to +Krt5; Hypo
0.56193	chr20	48451438	48452437	Intergenic	32326	336606	hadhb	hydroxyacyl-CoA dehydrogenase trifunctional multienzyme complex subunit beta	WT to +Krt5; Hypo
0.561943	chr21	43388685	43389684	Intergenic	-15991	751637	frmd7	FERM domain containing 7	WT to +Krt5; Hypo
0.56203	chr2	9472869	9473868	Intergenic	209488	415239	pigk	phosphatidylinositol glycan anchor biosynthesis, class K	WT to +Krt5; Hypo
0.562062	chr6	1729944	1730943	Intergenic	78302	406493	myl9b	myosin, light chain 9b, regulatory	WT to +Krt5; Hypo
0.562134	chr14	33292285	33293284	Intergenic	-19330	394007	xpnpep2	X-prolyl aminopeptidase (aminopeptidase P) 2, membrane-bound	WT to +Krt5; Hypo
0.562314	chr6	43844712	43845875	Intron (NM_001039637, Intron 2 of 19)	39867	569047	foxp1b	forkhead box P1b	WT to +Krt5; Hypo
0.562609	chr7	34386374	34387399	Intergenic	37838	565213	slc9a5	solute carrier family 9 member A5	WT to +Krt5; Hypo
0.562866	chr2	15905189	15906188	Intergenic	-11306	100003064	si:ch211-163b2.4	si:ch211-163b2.4	WT to +Krt5; Hypo
0.562953	chr16	41361205	41362204	Intergenic	148880	100142634	sc:d156	sc:d156	WT to +Krt5; Hypo
0.563458	chr11	36996673	36997672	Intergenic	63226	100003906	zgc:112265	zgc:112265	WT to +Krt5; Hypo
0.563498	chr16	44365253	44366252	Intergenic	31928	100144569	dpys	dihydropyrimidinase	WT to +Krt5; Hypo
0.5637	chr7	39606586	39607585	Intergenic	-126573	559037	grpel1	GrpE-like 1, mitochondrial	WT to +Krt5; Hypo
0.564126	chr22	21011670	21012669	Intron (NM_001202512, Intron 1 of 17)	9547	321750	ssbp4	single stranded DNA binding protein 4	WT to +Krt5; Hypo
0.564129	chr8	45463169	45464168	Intergenic	-40746	406419	ywhabb	tyrosine 3-monooxygenase/tryptophan 5-monooxygenase activation protein, beta polypeptide b	WT to +Krt5; Hypo
0.564239	chr21	14062398	14063397	Intergenic	297977	574003	stxbp1a	syntaxin binding protein 1a	WT to +Krt5; Hypo
0.564385	chr5	33721301	33722300	Intergenic	-136838	567525	fibcd1	fibrinogen C domain containing 1	WT to +Krt5; Hypo
0.564424	chr20	4396130	4397911	Intergenic	-108881	767791	ipcef1	interaction protein for cytohesin exchange factors 1	WT to +Krt5; Hypo
0.564513	chr6	26921452	26922451	Intergenic	-16762	794178	hdlbpa	high density lipoprotein binding protein a	WT to +Krt5; Hypo
0.56453	chr19	40797118	40798117	Intron (NM_001365105, Intron 2 of 27)	4971	100034394	vps50	VPS50 EARP/GARPII complex subunit	WT to +Krt5; Hypo
0.564545	chr6	22728603	22729602	Intergenic	70752	100136852	zgc:174863	zgc:174863	WT to +Krt5; Hypo
0.564872	chr14	14056620	14057619	Intron (NM_001166332, Intron 1 of 4)	47604	562702	nlgn3a	neuroligin 3a	WT to +Krt5; Hypo
0.565332	chr21	9649989	9650988	Intergenic	167040	569698	mapk10	mitogen-activated protein kinase 10	WT to +Krt5; Hypo
0.565584	chr22	12555167	12556166	Intergenic	-14744	436726	zgc:92335	zgc:92335	WT to +Krt5; Hypo
0.565888	chr2	736519	737518	Intergenic	79668	100148408	foxc1a	forkhead box C1a	WT to +Krt5; Hypo
0.565999	chr4	23371951	23372950	Intergenic	-10238	564112	magi2a	membrane associated guanylate kinase, WW and PDZ domain containing 2a	WT to +Krt5; Hypo
0.56619	chr3	14215850	14216849	Intron (NM_200456, Intron 6 of 8)	-21861	449652	tlcd4b	TLC domain containing 4b	WT to +Krt5; Hypo
0.566253	chr5	40917680	40918679	Exon (NM_201481, Exon 13 of 17)	7908	327197	vcp	valosin containing protein	WT to +Krt5; Hypo
0.566569	chr6	8695740	8696739	Intergenic	-175285	798985	vps16	vacuolar protein sorting 16 homolog	WT to +Krt5; Hypo
0.566596	chr20	17102313	17103312	Intergenic	-95798	436862	psma6b	proteasome subunit alpha 6b	WT to +Krt5; Hypo
0.566626	chr5	9003534	9004533	Intergenic	79824	792506	ugt2b6	UDP glucuronosyltransferase 2 family, polypeptide B6	WT to +Krt5; Hypo
0.566811	chr12	38185996	38186995	Intergenic	-195575	436759	rpl38	ribosomal protein L38	WT to +Krt5; Hypo
0.566875	chr7	56518450	56519449	Intergenic	14939	565126	senp8	SUMO peptidase family member, NEDD8 specific	WT to +Krt5; Hypo
0.567192	chr9	36309495	36310494	Intergenic	217516	64616	atp1a1b	ATPase Na+/K+ transporting subunit alpha 1b	WT to +Krt5; Hypo
0.567252	chr5	43669069	43670068	Intergenic	-77021	449661	tars	threonyl-tRNA synthetase	WT to +Krt5; Hypo
0.567539	chr25	30545847	30546846	Intergenic	55093	100033730	mir135a	microRNA 135a	WT to +Krt5; Hypo
0.567649	chr4	44005034	44006033	Intergenic	1458673	100126111	znf1137	zinc finger protein 1137	WT to +Krt5; Hypo
0.567688	chr19	21004036	21005035	Intergenic	-106597	378993	satb1a	SATB homeobox 1a	WT to +Krt5; Hypo
0.567749	chr17	15673550	15674549	Intergenic	-14806	447827	manea	mannosidase, endo-alpha	WT to +Krt5; Hypo
0.568108	chr1	50327520	50328519	Intron (NM_001309523, Intron 1 of 8)	2910	399662	mdh1aa	malate dehydrogenase 1Aa, NAD (soluble)	WT to +Krt5; Hypo
0.568328	chr9	52338183	52339182	Intergenic	-304612	767660	tank	TRAF family member-associated NFKB activator	WT to +Krt5; Hypo
0.56844	chr21	18445363	18446362	Intergenic	206483	406372	wdr5	WD repeat domain 5	WT to +Krt5; Hypo
0.5686	chr3	37061533	37062532	Intergenic	-55283	554119	mlx	MAX dimerization protein MLX	WT to +Krt5; Hypo
0.568777	chr19	36465920	36466919	Intergenic	253846	114408	angpt2b	angiopoietin 2b	WT to +Krt5; Hypo
0.568802	chr19	31488495	31489494	Intergenic	14589	564783	sostdc1b	sclerostin domain containing 1b	WT to +Krt5; Hypo
0.568826	chr9	37412777	37413838	Intron (NM_130967, Intron 2 of 13)	81266	30154	gli2a	GLI family zinc finger 2a	WT to +Krt5; Hypo
0.569009	chr11	39921379	39922378	Intron (NM_001077733, Intron 6 of 8)	18462	777625	znf362a	zinc finger protein 362a	WT to +Krt5; Hypo
0.56913	chr3	46258115	46259114	Intergenic	542960	563570	hs3st4	heparan sulfate (glucosamine) 3-O-sulfotransferase 4	WT to +Krt5; Hypo
0.569285	chr22	14235309	14236308	Intergenic	143494	325226	bzw1a	basic leucine zipper and W2 domains 1a	WT to +Krt5; Hypo
0.56944	chr6	739648	740647	Intergenic	-52047	352924	txnrd3	thioredoxin reductase 3	WT to +Krt5; Hypo
0.56946	chr5	2843389	2844388	Intergenic	2884	100033664	mir142a	microRNA 142a	WT to +Krt5; Hypo
0.570447	chr18	28603607	28604606	Intron (NM_131515, Intron 2 of 15)	17706	58027	spon1a	spondin 1a	WT to +Krt5; Hypo
0.570644	chr3	14281826	14282893	Intron (NM_001362515, Intron 3 of 8)	4967	449652	tlcd4b	TLC domain containing 4b	WT to +Krt5; Hypo
0.570682	chr25	35984574	35985573	Intergenic	83957	321806	irx3b	iroquois homeobox 3b	WT to +Krt5; Hypo
0.571058	chr18	43871813	43872812	Intergenic	127868	449532	bcl9l	bcl9 like	WT to +Krt5; Hypo
0.571104	chr18	37667246	37668245	Intergenic	-293087	561411	yap1	Yes-associated protein 1	WT to +Krt5; Hypo
0.571223	chr18	42254282	42256182	Intron (NM_199804, Intron 10 of 22)	154229	327429	cntn5	contactin 5	WT to +Krt5; Hypo
0.571486	chr4	2857621	2858809	Intergenic	-69198	562772	slco1c1	solute carrier organic anion transporter family, member 1C1	WT to +Krt5; Hypo
0.571894	chr13	51228705	51229976	Intergenic	55210	58109	valopa	vertebrate ancient long opsin a	WT to +Krt5; Hypo
0.57226	chr24	24743438	24744437	Intergenic	-34054	100001552	pcyt1ba	phosphate cytidylyltransferase 1, choline, beta a	WT to +Krt5; Hypo
0.572268	chr9	45194057	45195056	Intron (NM_001040004, Intron 2 of 10)	1255	677660	retsatl	retinol saturase (all-trans-retinol 13,14-reductase) like	WT to +Krt5; Hypo
0.572741	chr18	28077756	28079062	Intergenic	129810	569156	hipk3b	homeodomain interacting protein kinase 3b	WT to +Krt5; Hypo
0.572801	chr16	43321639	43322638	Intergenic	7613	81593	cldn12	claudin 12	WT to +Krt5; Hypo
0.573025	chr20	356326	357325	Intron (NM_001029969, Intron 2 of 13)	16352	574422	fynb	FYN proto-oncogene, Src family tyrosine kinase b	WT to +Krt5; Hypo
0.57304	chr12	12057008	12058007	Intergenic	-638185	565082	htra1b	HtrA serine peptidase 1b	WT to +Krt5; Hypo
0.573256	chr6	15285504	15286596	Intron (NM_001281505, Intron 1 of 3)	39261	568691	tmtops2a	teleost multiple tissue opsin 2a	WT to +Krt5; Hypo
0.573284	chr1	29241568	29242567	Intergenic	-6667	100000640	march4l	membrane-associated ring finger (C3HC4) 4, like	WT to +Krt5; Hypo
0.573664	chr18	9177853	9178852	Intergenic	-35407	30250	sema3d	sema domain, immunoglobulin domain (Ig), short basic domain, secreted, (semaphorin) 3D	WT to +Krt5; Hypo
0.573713	chr12	15919351	15920350	Intergenic	-118417	503523	znf281b	zinc finger protein 281b	WT to +Krt5; Hypo
0.573841	chr14	41860097	41861096	Intergenic	55349	562031	pcdh18b	protocadherin 18b	WT to +Krt5; Hypo
0.573998	chr5	24884803	24885802	Intergenic	97670	334724	anxa1a	annexin A1a	WT to +Krt5; Hypo
0.574172	chr16	35312608	35313607	Intron (NM_001002299, Intron 1 of 28)	63821	335096	ptprub	protein tyrosine phosphatase receptor type Ub	WT to +Krt5; Hypo
0.574395	chr2	25216857	25217856	Intron (NM_001003419, Intron 2 of 4)	4919	445024	rab3aa	RAB3A, member RAS oncogene family, a	WT to +Krt5; Hypo
0.574519	chr21	32586429	32587428	Intergenic	-152387	664766	zgc:123105	zgc:123105	WT to +Krt5; Hypo
0.574535	chr16	31249588	31250587	Intergenic	-19299	541533	scrt1b	scratch family zinc finger 1b	WT to +Krt5; Hypo
0.574732	chr9	16101211	16102210	Intron (NM_001083868, Intron 1 of 6)	23879	797527	crfb4	cytokine receptor family member b4	WT to +Krt5; Hypo
0.574755	chr2	43370967	43371966	Intron (NM_205735, Intron 1 of 21)	15863	403050	pard3ab	par-3 family cell polarity regulator alpha, b	WT to +Krt5; Hypo
0.574782	chr6	34044417	34045416	Intron (NM_001326582, Intron 1 of 4)	1074	794764	si:ch73-185c24.2	si:ch73-185c24.2	WT to +Krt5; Hypo
0.574955	chr12	43198718	43199819	Intergenic	458997	572187	dock1	dedicator of cytokinesis 1	WT to +Krt5; Hypo
0.574966	chr17	33367052	33368051	Intergenic	23210	402784	dnajc27	DnaJ (Hsp40) homolog, subfamily C, member 27	WT to +Krt5; Hypo
0.575204	chr15	15127159	15128158	Intergenic	-169218	797134	med29	mediator complex subunit 29	WT to +Krt5; Hypo
0.575294	chr5	59488657	59489656	Intergenic	-356261	564044	tmem132e	transmembrane protein 132E	WT to +Krt5; Hypo
0.5753	chr14	30372974	30373973	TTS (NM_200409)	-9710	494044	efemp2a	EGF containing fibulin extracellular matrix protein 2a	WT to +Krt5; Hypo
0.575455	chr14	9883117	9884116	Intron (NM_001142584, Intron 1 of 9)	70896	100149452	il1rapl2	interleukin 1 receptor accessory protein-like 2	WT to +Krt5; Hypo
0.575807	chr4	60082137	60083291	Intergenic	-197201	100141492	znf1077	zinc finger protein 1077	WT to +Krt5; Hypo
0.575984	chr18	29737220	29738219	Intergenic	182396	368857	cmc2	C-x(9)-C motif containing 2	WT to +Krt5; Hypo
0.57617	chr19	39914628	39915627	Intergenic	-523798	406564	sfpq	splicing factor proline/glutamine-rich	WT to +Krt5; Hypo
0.576347	chr15	12549899	12550898	Intron (NM_001077570, Intron 1 of 4)	19123	566069	scn4ba	sodium channel, voltage-gated, type IV, beta a	WT to +Krt5; Hypo
0.576631	chr2	48672695	48673695	Intergenic	34112	797092	si:dkeyp-94g1.1	si:dkeyp-94g1.1	WT to +Krt5; Hypo
0.57689	chr1	5780985	5781984	Intron (NM_001020643, Intron 1 of 3)	14913	553670	klf7a	Kruppel-like factor 7a	WT to +Krt5; Hypo
0.577643	chr16	6221297	6222751	Intergenic	82593	30265	ctnnb1	catenin (cadherin-associated protein), beta 1	WT to +Krt5; Hypo
0.577743	chr13	24577415	24578414	Intron (NM_001014303, Intron 10 of 11)	9024	541490	erlin1	ER lipid raft associated 1	WT to +Krt5; Hypo
0.577755	chr3	49578338	49579337	Intergenic	-170499	570333	rcvrna	recoverin a	WT to +Krt5; Hypo
0.577762	chr16	37889228	37890227	Intergenic	-52023	562035	cep162	centrosomal protein 162	WT to +Krt5; Hypo
0.578173	chr19	26032458	26033775	Intergenic	-32283	555634	tac1	tachykinin 1	WT to +Krt5; Hypo
0.578425	chr6	25034428	25035427	Intergenic	30957	571228	znf326	zinc finger protein 326	WT to +Krt5; Hypo
0.578771	chr6	2319728	2320727	Intergenic	-25490	570960	pbx1b	pre-B-cell leukemia homeobox 1b	WT to +Krt5; Hypo
0.578812	chr3	40888599	40889696	Intergenic	-54473	324340	cyp3c1	cytochrome P450, family 3, subfamily c, polypeptide 1	WT to +Krt5; Hypo
0.578959	chr1	29469967	29470966	Intron (NM_001080616, Intron 43 of 44)	92427	100000151	si:dkey-22o12.2	si:dkey-22o12.2	WT to +Krt5; Hypo
0.579	chr17	7908923	7909922	Intergenic	-145877	550539	slc18b1	solute carrier family 18 member B1	WT to +Krt5; Hypo
0.579161	chr8	41427428	41428427	Intergenic	-18192	393550	arpc5la	actin related protein 2/3 complex, subunit 5-like, a	WT to +Krt5; Hypo
0.579253	chr15	17741328	17742327	Intergenic	-170741	553749	zgc:113279	zgc:113279	WT to +Krt5; Hypo
0.579566	chr7	51909979	51910978	Intron (NM_213018, Intron 17 of 19)	26474	406291	katnb1	katanin p80 (WD repeat containing) subunit B 1	WT to +Krt5; Hypo
0.579957	chr17	41486849	41487848	Intergenic	12280	323882	insm1b	insulinoma-associated 1b	WT to +Krt5; Hypo
0.580167	chr17	11852126	11853125	Intron (NM_001037400, Intron 5 of 11)	51480	569507	smyd3	SET and MYND domain containing 3	WT to +Krt5; Hypo
0.58028	chr12	48185343	48186342	Intron (NM_198811, Intron 18 of 19)	-26572	550273	ascc1	activating signal cointegrator 1 complex subunit 1	WT to +Krt5; Hypo
0.580353	chr1	31242434	31243569	Exon (NM_131358, Exon 12 of 14)	32552	30630	anos1a	anosmin 1a	WT to +Krt5; Hypo
0.580435	chr3	34523930	34524929	Exon (NM_194389, Exon 1 of 1)	1071	373086	znfl1	zinc finger-like gene 1	WT to +Krt5; Hypo
0.580611	chr17	31248638	31249637	Intergenic	28234	797157	prlh2r	prolactin releasing hormone 2 receptor	WT to +Krt5; Hypo
0.580771	chr3	45787200	45788199	Intergenic	-366746	767746	zgc:153426	zgc:153426	WT to +Krt5; Hypo
0.580827	chr19	1530123	1531122	Intergenic	-96007	564658	scrt1a	scratch family zinc finger 1a	WT to +Krt5; Hypo
0.580862	chr11	40368315	40369314	Intron (NM_213313, Intron 6 of 6)	14207	406605	prxl2b	peroxiredoxin like 2B	WT to +Krt5; Hypo
0.581165	chr2	48409799	48410798	Intergenic	-8662	561830	gigyf2	GRB10 interacting GYF protein 2	WT to +Krt5; Hypo
0.581367	chr17	51835270	51836269	Intergenic	-31681	692064	numb	NUMB endocytic adaptor protein	WT to +Krt5; Hypo
0.58143	chr3	13284826	13285825	Intron (NM_213222, Intron 2 of 9)	2380	406329	dhps	deoxyhypusine synthase	WT to +Krt5; Hypo
0.582266	chr4	52891890	52892889	Intergenic	335915	100008037	si:ch211-227e10.6	si:ch211-227e10.6	WT to +Krt5; Hypo
0.582305	chr1	18488811	18489810	Exon (NM_001166048, Exon 11 of 33)	33089	100073332	ptprdb	protein tyrosine phosphatase receptor type Db	WT to +Krt5; Hypo
0.582342	chr9	54495322	54496321	Intergenic	-116741	793949	tmsb4x	thymosin beta 4 X-linked	WT to +Krt5; Hypo
0.582405	chr18	46456476	46457475	Intron (NM_001083045, Intron 2 of 11)	9508	100034387	sphkap	SPHK1 interactor, AKAP domain containing	WT to +Krt5; Hypo
0.582491	chr22	926814	927813	Intron (NM_001146150, Intron 14 of 43)	24273	570683	cacna1sa	calcium channel, voltage-dependent, L type, alpha 1S subunit, a	WT to +Krt5; Hypo
0.582713	chr3	35224665	35225664	Intergenic	-51475	445396	rbbp6	retinoblastoma binding protein 6	WT to +Krt5; Hypo
0.582935	chr20	32869870	32870869	Intergenic	16485	393590	lratd1	LRAT domain containing 1	WT to +Krt5; Hypo
0.583189	chr19	40617409	40618457	Non-coding (NR_003147, Exon 4 of 4)	-5951	336575	grn2	granulin 2	WT to +Krt5; Hypo
0.583297	chr6	47760659	47761721	Intergenic	-86564	386792	padi2	peptidyl arginine deiminase, type II	WT to +Krt5; Hypo
0.58342	chr9	2272783	2273782	Intergenic	-63849	394151	atp5mc3a	ATP synthase membrane subunit c locus 3a	WT to +Krt5; Hypo
0.58349	chr23	7452469	7453468	Intron (NM_131235, Intron 5 of 6)	7140	30482	gata5	GATA binding protein 5	WT to +Krt5; Hypo
0.58352	chr6	20924256	20925255	Intergenic	387549	554176	cygb2	cytoglobin 2	WT to +Krt5; Hypo
0.583573	chr7	34711171	34712455	Intron (NM_001327843, Intron 2 of 2)	19535	768189	ddx28	DEAD (Asp-Glu-Ala-Asp) box polypeptide 28	WT to +Krt5; Hypo
0.583756	chr2	32248247	32249590	Intron (NM_200070, Intron 4 of 10)	30151	337591	fam49ba	family with sequence similarity 49 member Ba	WT to +Krt5; Hypo
0.583758	chr24	6497446	6498445	Intron (NM_001353350, Intron 18 of 24)	119935	101883923	arhgap21a	Rho GTPase activating protein 21a	WT to +Krt5; Hypo
0.583912	chr5	33558805	33559836	Intron (NM_001128543, Intron 1 of 6)	25642	567525	fibcd1	fibrinogen C domain containing 1	WT to +Krt5; Hypo
0.583942	chr4	26922434	26923433	Intergenic	187003	393495	creld2	cysteine-rich with EGF-like domains 2	WT to +Krt5; Hypo
0.583973	chr19	16550262	16551261	Intergenic	391891	567701	gmeb1	glucocorticoid modulatory element binding protein 1	WT to +Krt5; Hypo
0.584125	chr18	10683444	10684443	Intergenic	-17996	114482594	mir129-3	microRNA mir-129-3	WT to +Krt5; Hypo
0.584164	chr21	12684079	12685078	Intergenic	303673	619266	zgc:109965	zgc:109965	WT to +Krt5; Hypo
0.58424	chr4	38002693	38003695	Intergenic	401638	100141335	znf1051	zinc finger protein 1051	WT to +Krt5; Hypo
0.584597	chr22	14984900	14985899	Exon (NM_001365944, Exon 4 of 4)	173630	402863	gtpbp1l	GTP binding protein 1, like	WT to +Krt5; Hypo
0.584705	chr22	22909219	22910218	Intergenic	-98710	100033461	mir181a-1	microRNA 181a-1	WT to +Krt5; Hypo
0.584751	chr5	53121004	53122003	Intergenic	-56844	436827	sat2b	spermidine/spermine N1-acetyltransferase family member 2b	WT to +Krt5; Hypo
0.585077	chr4	5219930	5220929	Intergenic	18267	192335	atp6v1e1b	ATPase H+ transporting V1 subunit E1b	WT to +Krt5; Hypo
0.585157	chr15	39462373	39463372	Intron (NM_001365166, Intron 22 of 31)	293305	30769	robo1	roundabout, axon guidance receptor, homolog 1 (Drosophila)	WT to +Krt5; Hypo
0.585191	chr2	21734154	21735402	Intron (NM_200068, Intron 13 of 14)	17373	100628678	mir26a-2	microRNA 26a-2	WT to +Krt5; Hypo
0.585242	chr25	26549587	26550696	Intron (NM_001287539, Intron 1 of 9)	70150	569768	grm8b	glutamate receptor, metabotropic 8b	WT to +Krt5; Hypo
0.585432	chr5	38260177	38261176	Intergenic	-25670	563428	fras1	Fraser extracellular matrix complex subunit 1	WT to +Krt5; Hypo
0.585447	chr1	12672228	12673227	Intergenic	-88442	572532	pcdh18a	protocadherin 18a	WT to +Krt5; Hypo
0.58583	chr9	11816231	11817330	Intergenic	-111498	334307	zc3h15	zinc finger CCCH-type containing 15	WT to +Krt5; Hypo
0.586484	chr4	1993578	1994577	Intergenic	-4198	393262	pwp1	PWP1 homolog, endonuclein	WT to +Krt5; Hypo
0.586498	chr6	53513786	53514785	Intron (NM_001013503, Intron 13 of 14)	85436	393338	abhd14b	abhydrolase domain containing 14B	WT to +Krt5; Hypo
0.587035	chr12	11141225	11142224	Intron (NM_001098181, Intron 15 of 29)	12140	563454	vps35l	VPS35 endosomal protein sorting factor like	WT to +Krt5; Hypo
0.587207	chr2	6891929	6892928	Intergenic	-121818	550519	rgs5b	regulator of G protein signaling 5b	WT to +Krt5; Hypo
0.58735	chr10	33722939	33723938	Intron (NM_001302248, Intron 8 of 14)	40954	564156	b3glctb	beta 3-glucosyltransferase b	WT to +Krt5; Hypo
0.587516	chr9	12780429	12781435	Intergenic	-93019	449768	pttg1ipb	PTTG1 interacting protein b	WT to +Krt5; Hypo
0.587643	chr8	14556046	14557045	Intergenic	-39465	100004382	qsox1	quiescin Q6 sulfhydryl oxidase 1	WT to +Krt5; Hypo
0.587727	chr3	47025692	47026691	Intron (NM_001080608, Intron 1 of 1)	31170	571246	hs3st2	heparan sulfate (glucosamine) 3-O-sulfotransferase 2	WT to +Krt5; Hypo
0.587926	chr1	16514308	16515307	Intergenic	-169178	406172	fat1a	FAT atypical cadherin 1a	WT to +Krt5; Hypo
0.587965	chr20	1026889	1027888	Intron (NM_212867, Intron 10 of 15)	71842	405803	rngtt	RNA guanylyltransferase and 5'-phosphatase	WT to +Krt5; Hypo
0.588206	chr14	1308233	1309232	Intergenic	-7924	100150203	il21	interleukin 21	WT to +Krt5; Hypo
0.588226	chr4	49760412	49761411	Intergenic	-665372	103908622	zgc:173705	zgc:173705	WT to +Krt5; Hypo
0.588307	chr9	37641147	37642232	Exon (NM_001004597, Exon 9 of 9)	84495	447858	slc49a4	solute carrier family 49 member 4	WT to +Krt5; Hypo
0.588565	chr5	44162927	44163926	Intron (NM_001099990, Intron 17 of 24)	-42796	321453	ctsla	cathepsin La	WT to +Krt5; Hypo
0.588632	chr16	10910164	10911163	Exon (NM_131685, Exon 9 of 22)	24877	64611	atp1a3b	ATPase Na+/K+ transporting subunit alpha 3b	WT to +Krt5; Hypo
0.58867	chr23	13722795	13723794	Intergenic	-124847	100310765	mir1388	microRNA mir-1388	WT to +Krt5; Hypo
0.58884	chr11	19154788	19155787	Intergenic	-116640	368250	prickle2b	prickle homolog 2b	WT to +Krt5; Hypo
0.588841	chr1	9935474	9936943	Promoter-TSS (NM_001044827)	26	557456	trpc5a	transient receptor potential cation channel, subfamily C, member 5a	WT to +Krt5; Hypo
0.58885	chr25	15127591	15128590	Intergenic	-10155	30245	wt1a	WT1 transcription factor a	WT to +Krt5; Hypo
0.589179	chr25	14044458	14045457	Intergenic	-24098	567595	shank2b	SH3 and multiple ankyrin repeat domains 2b	WT to +Krt5; Hypo
0.589198	chr22	547392	548391	Intergenic	14402	560064	tmcc2	transmembrane and coiled-coil domain family 2	WT to +Krt5; Hypo
0.589387	chr18	29839326	29840325	Intergenic	80290	368857	cmc2	C-x(9)-C motif containing 2	WT to +Krt5; Hypo
0.589486	chr8	15073959	15074958	Intron (NM_001113620, Intron 2 of 10)	50167	570610	bcar3	BCAR3 adaptor protein, NSP family member	WT to +Krt5; Hypo
0.58956	chr10	160402	161401	3' UTR (NM_001008616, Exon 8 of 8)	6959	494073	erg	ETS transcription factor ERG	WT to +Krt5; Hypo
0.589749	chr6	14655373	14656372	Intergenic	-167138	30321	pou3f3b	POU class 3 homeobox 3b	WT to +Krt5; Hypo
0.589933	chr6	51259702	51260701	Intergenic	313775	795522	rbl1	retinoblastoma-like 1 (p107)	WT to +Krt5; Hypo
0.589948	chr15	45009772	45010771	Intergenic	157870	100333015	dync2h1	dynein cytoplasmic 2 heavy chain 1	WT to +Krt5; Hypo
0.589962	chr14	8397806	8398805	Intergenic	-78617	100005305	zgc:162144	zgc:162144	WT to +Krt5; Hypo
0.59033	chr20	8497285	8498284	Intergenic	-66466	692351	dab1a	DAB adaptor protein 1a	WT to +Krt5; Hypo
0.590531	chr1	54555218	54556234	Intergenic	15119	140631	nanos3	nanos homolog 3	WT to +Krt5; Hypo
0.590572	chr2	31904569	31905568	Intergenic	48719	393804	amph	amphiphysin	WT to +Krt5; Hypo
0.590646	chr14	6142758	6143757	Intron (NM_001114586, Intron 4 of 45)	20585	100136868	abca1b	ATP-binding cassette, sub-family A (ABC1), member 1B	WT to +Krt5; Hypo
0.591	chr2	37940638	37941637	Intergenic	33303	559705	cbln10	cerebellin 10	WT to +Krt5; Hypo
0.591107	chr11	8903403	8904402	Intergenic	345617	553608	tbl1xr1a	transducin (beta)-like 1 X-linked receptor 1a	WT to +Krt5; Hypo
0.591135	chr18	6815946	6817044	Intergenic	-33200	571850	miox	myo-inositol oxygenase	WT to +Krt5; Hypo
0.59116	chr8	48605792	48606791	Intergenic	-8376	567953	nppal	natriuretic peptide A-like	WT to +Krt5; Hypo
0.591193	chr21	9874561	9875560	Intergenic	23709	767774	esm1	endothelial cell-specific molecule 1	WT to +Krt5; Hypo
0.591359	chr15	28733065	28734157	Intron (NM_200018, Intron 6 of 11)	11167	336541	blmh	bleomycin hydrolase	WT to +Krt5; Hypo
0.591385	chr8	49044564	49045563	Intergenic	-31516	445387	ddx51	DEAD (Asp-Glu-Ala-Asp) box polypeptide 51	WT to +Krt5; Hypo
0.59141	chr12	5005646	5006683	Intergenic	-6953	561788	kif22	kinesin family member 22	WT to +Krt5; Hypo
0.591476	chr20	14095386	14096385	Intron (NM_001080631, Intron 2 of 2)	20974	553945	si:ch211-22i13.2	si:ch211-22i13.2	WT to +Krt5; Hypo
0.591612	chr10	23672919	23673931	Intron (NM_200664, Intron 1 of 10)	266235	793954	cadm2a	cell adhesion molecule 2a	WT to +Krt5; Hypo
0.591615	chr2	21684884	21686454	Exon (NM_200887, Exon 6 of 12)	8328	393861	hhatla	hedgehog acyltransferase like, a	WT to +Krt5; Hypo
0.591711	chr19	17160894	17161893	Intergenic	144953	678630	stmn1a	stathmin 1a	WT to +Krt5; Hypo
0.591897	chr3	37857391	37858416	Intron (NM_214788, Intron 4 of 12)	175493	407669	asic2	acid-sensing (proton-gated) ion channel 2	WT to +Krt5; Hypo
0.592226	chr25	20483441	20484503	Intergenic	-6815	619263	adal	adenosine deaminase-like	WT to +Krt5; Hypo
0.592326	chr3	23105942	23106941	3' UTR (NM_199214, Exon 53 of 53)	15815	337158	col1a1a	collagen, type I, alpha 1a	WT to +Krt5; Hypo
0.592335	chr18	34163515	34164514	Intergenic	16727	565816	c18h3orf33	c18h3orf33 homolog (H. sapiens)	WT to +Krt5; Hypo
0.59261	chr11	42504349	42505348	Intron (NM_001001823, Intron 8 of 12)	30966	402828	tdrd3	tudor domain containing 3	WT to +Krt5; Hypo
0.592618	chr2	46004585	46005584	Intergenic	-167010	724011	fam102ba	family with sequence similarity 102 member Ba	WT to +Krt5; Hypo
0.592621	chr11	28466085	28467084	Intron (NM_001278321, Intron 4 of 9)	96194	569798	aadacl4	arylacetamide deacetylase-like 4	WT to +Krt5; Hypo
0.592708	chr5	28042302	28043301	Intron (NM_130907, Intron 1 of 21)	-36038	30037	tnc	tenascin C	WT to +Krt5; Hypo
0.592736	chr12	8465807	8466806	Intergenic	-17825	30190	egr2b	early growth response 2b	WT to +Krt5; Hypo
0.593142	chr21	4405571	4406762	Intergenic	-30877	799960	dolk	dolichol kinase	WT to +Krt5; Hypo
0.593989	chr3	27449973	27451032	Intergenic	20468	327299	zgc:66160	zgc:66160	WT to +Krt5; Hypo
0.594071	chr22	4595192	4596191	Intron (NM_200074, Intron 8 of 18)	9844	337851	cherp	calcium homeostasis endoplasmic reticulum protein	WT to +Krt5; Hypo
0.594084	chr9	43769677	43770676	Intron (NM_001077569, Intron 15 of 20)	-33635	368405	znf385b	zinc finger protein 385B	WT to +Krt5; Hypo
0.594119	chr9	3901240	3902267	Intergenic	-201348	353154	sp5a	Sp5 transcription factor a	WT to +Krt5; Hypo
0.594155	chr16	18805237	18806236	Intergenic	75687	30486	rxrbb	retinoid x receptor, beta b	WT to +Krt5; Hypo
0.594183	chr10	34682888	34683887	Intron (NM_001013500, Intron 13 of 58)	144964	558997	dclk1a	doublecortin-like kinase 1a	WT to +Krt5; Hypo
0.594264	chr19	14684649	14686971	Intergenic	16162	568893	tent5bb	terminal nucleotidyltransferase 5Bb	WT to +Krt5; Hypo
0.594539	chr6	15605259	15606258	Intergenic	25148	561050	ackr3b	atypical chemokine receptor 3b	WT to +Krt5; Hypo
0.594577	chr5	39216829	39217828	Intergenic	-11928	327572	rasgef1ba	RasGEF domain family, member 1Ba	WT to +Krt5; Hypo
0.594911	chr8	2382400	2383399	Intron (NM_001126408, Intron 1 of 7)	2804	563309	si:ch211-220d9.3	si:ch211-220d9.3	WT to +Krt5; Hypo
0.595272	chr8	35431948	35432947	Intergenic	-36238	103911540	zgc:103700	zgc:103700	WT to +Krt5; Hypo
0.595625	chr16	20230145	20231144	Intron (NM_131028, Intron 2 of 11)	1800	246224	ahr1a	aryl hydrocarbon receptor 1a	WT to +Krt5; Hypo
0.595865	chr20	4099636	4100638	Intergenic	15355	568408	si:ch73-111k22.2	si:ch73-111k22.2	WT to +Krt5; Hypo
0.595903	chr11	7590223	7591253	Intergenic	-190263	406676	adgrl4	adhesion G protein-coupled receptor L4	WT to +Krt5; Hypo
0.595989	chr24	37134677	37135676	Intergenic	43797	768247	cog7	component of oligomeric golgi complex 7	WT to +Krt5; Hypo
0.596439	chr19	23700856	23701855	Intergenic	-10935	100137101	irgf1	immunity-related GTPase family, f1	WT to +Krt5; Hypo
0.596501	chr20	47062525	47063524	TTS (NM_001018134)	60639	553187	dnmt3aa	DNA (cytosine-5-)-methyltransferase 3 alpha a	WT to +Krt5; Hypo
0.596562	chr9	9036057	9037056	Intergenic	-35418	678608	ing1	inhibitor of growth family, member 1	WT to +Krt5; Hypo
0.596824	chr10	36915721	36916720	Intergenic	-51936	492491	dhrs13a.1	dehydrogenase/reductase (SDR family) member 13a, tandem duplicate 1	WT to +Krt5; Hypo
0.596902	chr18	44268535	44269534	Intergenic	54432	567699	si:ch211-151h10.2	si:ch211-151h10.2	WT to +Krt5; Hypo
0.596989	chr15	14316421	14317420	Intergenic	-42558	323315	zgc:162193	zgc:162193	WT to +Krt5; Hypo
0.597033	chr17	8121267	8122266	Intergenic	-10538	562701	ahi1	Abelson helper integration site 1	WT to +Krt5; Hypo
0.597074	chr6	54558005	54559004	Intergenic	-9908	794293	tead3b	TEA domain family member 3 b	WT to +Krt5; Hypo
0.597379	chr17	43132309	43133308	Intergenic	90807	100150438	isca2	iron-sulfur cluster assembly 2	WT to +Krt5; Hypo
0.597573	chr18	50040111	50041306	Exon (NM_001045317, Exon 5 of 5)	65758	724012	mob2b	MOB kinase activator 2b	WT to +Krt5; Hypo
0.597579	chr9	7270081	7271080	Intergenic	-10132	492339	creg2	cellular repressor of E1A-stimulated genes 2	WT to +Krt5; Hypo
0.597629	chr13	35509263	35510350	Intergenic	-107973	327360	memo1	mediator of cell motility 1	WT to +Krt5; Hypo
0.598197	chr18	4881585	4882584	Intergenic	122818	393527	pdcd10a	programmed cell death 10a	WT to +Krt5; Hypo
0.598306	chr15	11543458	11544464	Intergenic	38734	541390	ndufc2	NADH:ubiquinone oxidoreductase subunit C2	WT to +Krt5; Hypo
0.598593	chr14	10406407	10407406	Intron (NM_200653, Intron 30 of 34)	49669	692065	fgf16	fibroblast growth factor 16	WT to +Krt5; Hypo
0.598687	chr6	44471442	44472828	Intergenic	-67689	100005518	pdzrn3b	PDZ domain containing RING finger 3b	WT to +Krt5; Hypo
0.598762	chr20	20755324	20756323	Intron (NM_001328271, Intron 2 of 8)	-16661	327065	rtn1b	reticulon 1b	WT to +Krt5; Hypo
0.59881	chr6	15107693	15109073	Intron (NM_001003492, Intron 2 of 3)	-33377	793804	ecrg4b	ECRG4 augurin precursor b	WT to +Krt5; Hypo
0.598834	chr1	23897341	23898403	Intergenic	31287	393744	dctpp1	dCTP pyrophosphatase 1	WT to +Krt5; Hypo
0.599157	chr6	40902973	40903972	Intergenic	-1390	100000381	zgc:172271	zgc:172271	WT to +Krt5; Hypo
0.599551	chr25	30491207	30492206	Intergenic	109733	100033730	mir135a	microRNA 135a	WT to +Krt5; Hypo
0.59956	chr1	58500079	58501078	Intron (NM_213219, Intron 11 of 12)	14132	403007	zgc:76872	zgc:76872	WT to +Krt5; Hypo
0.599608	chr22	39045579	39046669	Intergenic	-52149	445097	gmppb	GDP-mannose pyrophosphorylase B	WT to +Krt5; Hypo
0.599711	chr8	13489742	13490741	Intergenic	13541	494166	b3gnt3.1	UDP-GlcNAc:betaGal beta-1,3-N-acetylglucosaminyltransferase 3, tandem duplicate 1	WT to +Krt5; Hypo
0.60012	chr17	9273314	9274904	Intergenic	-454982	777720	zranb1b	zinc finger, RAN-binding domain containing 1b	WT to +Krt5; Hypo
0.600138	chr25	31413729	31414728	Intergenic	38046	324467	scamp5a	secretory carrier membrane protein 5a	WT to +Krt5; Hypo
0.600181	chr13	50603724	50604723	Intron (NM_001014817, Intron 4 of 4)	113270	544653	dntt	deoxynucleotidyltransferase, terminal	WT to +Krt5; Hypo
0.600187	chr4	58483470	58484469	Intergenic	500474	100136867	LOC100136867	uncharacterized LOC100136867	WT to +Krt5; Hypo
0.600266	chr16	20723481	20724480	Intergenic	32981	387531	cpvl	carboxypeptidase vitellogenic like	WT to +Krt5; Hypo
0.600273	chr17	31503312	31504311	Intergenic	-37364	564470	ltk	leukocyte receptor tyrosine kinase	WT to +Krt5; Hypo
0.600333	chr1	30525368	30527331	Intergenic	217844	100004503	eef1a1b	eukaryotic translation elongation factor 1 alpha 1b	WT to +Krt5; Hypo
0.600748	chr7	66756715	66757714	Intergenic	-103903	556502	adma	adrenomedullin a	WT to +Krt5; Hypo
0.600775	chr20	51013998	51014997	Intergenic	-19814	100007749	gphnb	gephyrin b	WT to +Krt5; Hypo
0.600825	chr11	27307314	27308430	Intergenic	11953	553644	barx1	BARX homeobox 1	WT to +Krt5; Hypo
0.600969	chr11	24092141	24093140	Exon (NM_201174, Exon 5 of 5)	-9129	406251	rbm39a	RNA binding motif protein 39a	WT to +Krt5; Hypo
0.601056	chr14	50026839	50027838	Intergenic	32857	565621	clp1	cleavage and polyadenylation factor I subunit 1	WT to +Krt5; Hypo
0.601086	chr12	10868835	10869837	Intergenic	-173138	30680	raraa	retinoic acid receptor, alpha a	WT to +Krt5; Hypo
0.601222	chr10	43114950	43116294	Intergenic	45078	386639	zcchc9	zinc finger, CCHC domain containing 9	WT to +Krt5; Hypo
0.601395	chr23	16433229	16434228	Intergenic	-273519	393709	mrgbp	MRG/MORF4L binding protein	WT to +Krt5; Hypo
0.601467	chr21	32214907	32215906	Intergenic	36684	503607	clk4b	CDC-like kinase 4b	WT to +Krt5; Hypo
0.601515	chr17	49806331	49807787	Intergenic	88402	554103	cox7a2a	cytochrome c oxidase subunit 7A2a	WT to +Krt5; Hypo
0.601946	chr5	2300452	2301518	Intron (NM_200293, Intron 3 of 3)	-139694	378848	hspa5	heat shock protein 5	WT to +Krt5; Hypo
0.602142	chr17	12143675	12144674	3' UTR (NM_131434, Exon 8 of 8)	86980	30711	snap25b	synaptosome associated protein 25b	WT to +Krt5; Hypo
0.602172	chr6	48271869	48272868	Exon (NM_182876, Exon 5 of 5)	17667	359837	wnt2ba	wingless-type MMTV integration site family, member 2Ba	WT to +Krt5; Hypo
0.602267	chr13	23390734	23391733	Intron (NM_214782, Intron 9 of 12)	90643	407653	prim2	DNA primase subunit 2	WT to +Krt5; Hypo
0.602368	chr1	15125551	15126550	Intergenic	-261324	553582	tusc3	tumor suppressor candidate 3	WT to +Krt5; Hypo
0.602431	chr21	13490681	13491680	Intergenic	74328	791173	pnpla7a	patatin-like phospholipase domain containing 7a	WT to +Krt5; Hypo
0.602596	chr22	37315737	37316736	Intergenic	98824	378723	sox2	SRY (sex determining region Y)-box 2	WT to +Krt5; Hypo
0.602669	chr11	33341229	33342228	Exon (NM_001024389, Exon 9 of 10)	14040	554019	lims1	LIM and senescent cell antigen-like domains 1	WT to +Krt5; Hypo
0.602723	chr19	46184450	46185591	Intergenic	-126002	795613	trps1	trichorhinophalangeal syndrome I	WT to +Krt5; Hypo
0.602983	chr11	18342963	18343962	Intergenic	51473	553277	dido1	death inducer-obliterator 1	WT to +Krt5; Hypo
0.603068	chr7	72602243	72603243	Intergenic	438966	100033729	mir31	microRNA 31	WT to +Krt5; Hypo
0.603239	chr1	30857672	30858911	Intron (NM_001020494, Intron 6 of 11)	17614	552924	slc2a15b	solute carrier family 2 member 15b	WT to +Krt5; Hypo
0.603276	chr13	49098304	49099303	Intergenic	55155	335866	irf2bp2a	interferon regulatory factor 2 binding protein 2a	WT to +Krt5; Hypo
0.603278	chr3	20714894	20715893	Intergenic	91899	406726	ndufa4l	NADH:ubiquinone oxidoreductase subunit A4, like	WT to +Krt5; Hypo
0.60336	chr19	43953082	43954081	Exon (NM_001082915, Exon 2 of 2)	3074	796164	gpr186	G protein-coupled receptor 186	WT to +Krt5; Hypo
0.60352	chr8	52678366	52679556	Intergenic	-38254	100359374	bcl2l16	BCL2 like 16	WT to +Krt5; Hypo
0.603594	chr14	10962220	10963219	Intergenic	-126696	553706	glod5	glyoxalase domain containing 5	WT to +Krt5; Hypo
0.603703	chr5	33710732	33711731	Intergenic	-126269	567525	fibcd1	fibrinogen C domain containing 1	WT to +Krt5; Hypo
0.603764	chr13	44363847	44364846	Intergenic	237301	563496	zfand3	zinc finger, AN1-type domain 3	WT to +Krt5; Hypo
0.603817	chr16	18132980	18133979	Intergenic	276335	791152	them4	thioesterase superfamily member 4	WT to +Krt5; Hypo
0.603852	chr19	29942828	29943847	Intergenic	-93452	555635	fndc5b	fibronectin type III domain containing 5b	WT to +Krt5; Hypo
0.603906	chr5	52668267	52669939	Intergenic	-265807	447818	taf6	TAF6 RNA polymerase II, TATA box binding protein (TBP)-associated factor	WT to +Krt5; Hypo
0.604164	chr2	36334162	36335161	Intergenic	204847	100331689	LOC100331689	trac-like	WT to +Krt5; Hypo
0.60424	chr2	50979137	50980136	Intergenic	87390	114415	neurod6b	neuronal differentiation 6b	WT to +Krt5; Hypo
0.604357	chr3	28099311	28100310	Intergenic	-154957	449554	rbfox1	RNA binding fox-1 homolog 1	WT to +Krt5; Hypo
0.604478	chr20	21048664	21049663	Intron (NM_199889, Intron 12 of 18)	-16054	553533	btbd6b	BTB (POZ) domain containing 6b	WT to +Krt5; Hypo
0.604486	chr8	46623947	46624946	Exon (NM_001083856, Exon 5 of 6)	4656	664686	tas1r2.2	taste receptor, type 1, member 2, tandem duplicate 2	WT to +Krt5; Hypo
0.604601	chr5	52849644	52850643	Intergenic	-84767	447818	taf6	TAF6 RNA polymerase II, TATA box binding protein (TBP)-associated factor	WT to +Krt5; Hypo
0.604619	chr20	54728553	54729552	Intron (NM_205633, Intron 1 of 11)	-83028	406394	yy1b	YY1 transcription factor b	WT to +Krt5; Hypo
0.604865	chr7	35793040	35794216	Intergenic	23614	30520	irx3a	iroquois homeobox 3a	WT to +Krt5; Hypo
0.605311	chr8	50637519	50638706	Intergenic	-100462	436920	egr3	early growth response 3	WT to +Krt5; Hypo
0.605385	chr16	43709956	43710955	Intergenic	213192	799528	sqlea	squalene epoxidase a	WT to +Krt5; Hypo
0.605708	chr23	28682509	28683508	Intron (NM_131361, Intron 1 of 28)	26754	30634	l1cama	L1 cell adhesion molecule, paralog a	WT to +Krt5; Hypo
0.6058	chr12	33059596	33060598	Intergenic	153814	550573	c1qtnf1	C1q and TNF related 1	WT to +Krt5; Hypo
0.605986	chr21	8234784	8235783	Intergenic	-13968	64278	psmb7	proteasome subunit beta 7	WT to +Krt5; Hypo
0.606815	chr11	29537067	29538066	Exon (NM_001312676, Exon 14 of 14)	-5886	402901	dynlt3	dynein, light chain, Tctex-type 3	WT to +Krt5; Hypo
0.606821	chr3	20840027	20841026	Intergenic	-7849	447844	slc35b1	solute carrier family 35 member B1	WT to +Krt5; Hypo
0.606917	chr12	33569473	33570477	Intergenic	-88576	541541	tdrkh	tudor and KH domain containing	WT to +Krt5; Hypo
0.606979	chr23	7411595	7412594	Intergenic	-4108	100307112	si:dkeyp-73a2.2	si:dkeyp-73a2.2	WT to +Krt5; Hypo
0.607064	chr22	34043160	34044177	Intergenic	-101966	100331190	LOC100331190	metabotropic glutamate receptor 7	WT to +Krt5; Hypo
0.607201	chr16	52575539	52576538	Intergenic	-50244	171481	fabp10a	fatty acid binding protein 10a, liver basic	WT to +Krt5; Hypo
0.607321	chr7	27759829	27760828	Intergenic	116791	280646	lmo1	LIM domain only 1	WT to +Krt5; Hypo
0.607355	chr21	9992738	9993737	Intergenic	-94468	767774	esm1	endothelial cell-specific molecule 1	WT to +Krt5; Hypo
0.607388	chr23	30448128	30449127	Intergenic	326304	405774	uts2a	urotensin 2, alpha	WT to +Krt5; Hypo
0.607407	chr2	12580402	12581401	Intergenic	33691	394039	zgc:66475	zgc:66475	WT to +Krt5; Hypo
0.607414	chr14	7673397	7674396	Intergenic	77636	541492	zgc:110843	zgc:110843	WT to +Krt5; Hypo
0.608076	chr18	33634870	33635869	Intergenic	88355	793325	olfcq10	olfactory receptor C family, q10	WT to +Krt5; Hypo
0.608116	chr2	44355025	44356024	Exon (NM_131683, Exon 21 of 25)	-8682	445129	sdhc	succinate dehydrogenase complex, subunit C, integral membrane protein	WT to +Krt5; Hypo
0.608478	chr7	67354996	67355995	Intergenic	109836	378961	rpl13	ribosomal protein L13	WT to +Krt5; Hypo
0.608654	chr14	47920214	47921213	Intergenic	-10750	566323	qdpra	quinoid dihydropteridine reductase a	WT to +Krt5; Hypo
0.608669	chr19	38360735	38361734	Intergenic	90414	437006	nxph1	neurexophilin 1	WT to +Krt5; Hypo
0.608786	chr16	26336599	26337598	Intron (NM_001044848, Intron 1 of 30)	21871	557983	arhgef1b	Rho guanine nucleotide exchange factor (GEF) 1b	WT to +Krt5; Hypo
0.608853	chr7	68021713	68022712	Exon (NM_001365188, Exon 5 of 10)	207001	100333211	zfhx3	zinc finger homeobox 3	WT to +Krt5; Hypo
0.608973	chr15	31607742	31608741	Intergenic	7043	554781	or102-5	odorant receptor, family C, subfamily 102, member 5	WT to +Krt5; Hypo
0.608975	chr19	10545725	10546724	Intergenic	69065	393695	necap1	NECAP endocytosis associated 1	WT to +Krt5; Hypo
0.608997	chr14	10330020	10331019	Intron (NM_001113596, Intron 5 of 12)	11370	563392	nup62l	nucleoporin 62 like	WT to +Krt5; Hypo
0.609001	chr20	21463180	21464179	Intergenic	-27844	140422	jag2b	jagged canonical Notch ligand 2b	WT to +Krt5; Hypo
0.609019	chr2	25838928	25839927	Intron (NM_001159832, Intron 13 of 24)	58546	795753	ghsra	growth hormone secretagogue receptor a	WT to +Krt5; Hypo
0.609023	chr10	19348939	19350469	Intergenic	-218701	550503	vsig8a	V-set and immunoglobulin domain containing 8a	WT to +Krt5; Hypo
0.609084	chr7	27672085	27673084	Intergenic	109647	550513	rras2	RAS related 2	WT to +Krt5; Hypo
0.609154	chr20	18701934	18702933	Intergenic	21810	799956	si:dkeyp-72h1.1	si:dkeyp-72h1.1	WT to +Krt5; Hypo
0.60928	chr15	37816877	37817876	Intergenic	110200	447843	ctrl	chymotrypsin-like	WT to +Krt5; Hypo
0.609343	chr8	874401	875400	Intron (NM_001003778, Intron 2 of 10)	3356	445321	mrps27	mitochondrial ribosomal protein S27	WT to +Krt5; Hypo
0.609435	chr25	31433528	31434527	Intron (NM_205547, Intron 5 of 6)	18247	324467	scamp5a	secretory carrier membrane protein 5a	WT to +Krt5; Hypo
0.609675	chr3	23748640	23749639	Intergenic	110782	30337	hoxb1a	homeobox B1a	WT to +Krt5; Hypo
0.609726	chr10	29029337	29030336	Intergenic	-80691	30194	alcama	activated leukocyte cell adhesion molecule a	WT to +Krt5; Hypo
0.609774	chr24	3514114	3515181	Intergenic	67472	558075	wdr37	WD repeat domain 37	WT to +Krt5; Hypo
0.609777	chr3	60567012	60568011	Intergenic	43368	570782	mfsd11	major facilitator superfamily domain containing 11	WT to +Krt5; Hypo
0.609778	chr21	2630464	2631463	Intergenic	150763	541479	hmgcrb	3-hydroxy-3-methylglutaryl-CoA reductase b	WT to +Krt5; Hypo
0.609803	chr23	8363697	8364696	Intron (NM_001319057, Intron 3 of 3)	85616	402851	oprl1	opiate receptor-like 1	WT to +Krt5; Hypo
0.60984	chr17	41388572	41389571	Intergenic	40699	793471	mocs1	molybdenum cofactor synthesis 1	WT to +Krt5; Hypo
0.610014	chr18	10004240	10005239	Intergenic	324599	566572	lrrc4.2	leucine rich repeat containing 4.2	WT to +Krt5; Hypo
0.610086	chr3	43840608	43841903	Intergenic	-234695	559954	fn3krp	fructosamine 3 kinase related protein	WT to +Krt5; Hypo
0.610157	chr5	38046318	38047317	Intergenic	27164	564884	si:ch211-271e10.3	si:ch211-271e10.3	WT to +Krt5; Hypo
0.610226	chr19	43056676	43057675	Intergenic	17480	406626	crtap	cartilage associated protein	WT to +Krt5; Hypo
0.610272	chr11	696077	697091	Exon (NM_001327771, Exon 3 of 13)	8667	100124610	timp4.3	TIMP metallopeptidase inhibitor 4, tandem duplicate 3	WT to +Krt5; Hypo
0.610284	chr7	73999096	74000369	Intergenic	-70274	334597	ppp1cbl	protein phosphatase 1, catalytic subunit, beta isoform, like	WT to +Krt5; Hypo
0.610483	chr8	232792	233791	Intergenic	15248	793445	prr16	proline rich 16	WT to +Krt5; Hypo
0.610553	chr2	49117403	49118410	Intergenic	179675	436961	cdc34b	cell division cycle 34 homolog (S. cerevisiae) b	WT to +Krt5; Hypo
0.610637	chr10	37760563	37761562	Intron (NM_001320102, Intron 7 of 14)	204605	100002680	msi2a	musashi RNA-binding protein 2a	WT to +Krt5; Hypo
0.610768	chr4	26977438	26978437	Intergenic	131999	393495	creld2	cysteine-rich with EGF-like domains 2	WT to +Krt5; Hypo
0.610825	chr25	11951940	11952939	Intron (NM_001256664, Intron 5 of 17)	171429	568668	ntrk3a	neurotrophic tyrosine kinase, receptor, type 3a	WT to +Krt5; Hypo
0.610852	chr8	41043924	41044923	Intron (NM_001089380, Intron 6 of 23)	43165	558437	gpat2	glycerol-3-phosphate acyltransferase 2, mitochondrial	WT to +Krt5; Hypo
0.610911	chr7	66968410	66969409	Exon (NM_001362396, Exon 7 of 12)	22423	393645	swap70a	switching B cell complex subunit SWAP70a	WT to +Krt5; Hypo
0.611098	chr8	53482091	53483090	Intergenic	71279	326866	actr8	actin related protein 8	WT to +Krt5; Hypo
0.611211	chr1	17776708	17778207	Intergenic	-24233	560697	klhl5	kelch-like family member 5	WT to +Krt5; Hypo
0.611256	chr5	58897125	58898124	Intron (NM_001127307, Intron 3 of 8)	13654	568626	dtx2	deltex 2, E3 ubiquitin ligase	WT to +Krt5; Hypo
0.611263	chr17	30058537	30059544	Intergenic	-129255	799739	spata17	spermatogenesis associated 17	WT to +Krt5; Hypo
0.6113	chr6	44093987	44094986	3' UTR (NM_001080600, Exon 12 of 12)	-47711	497613	rybpb	RING1 and YY1 binding protein b	WT to +Krt5; Hypo
0.611373	chr19	38202207	38203206	Exon (NM_001122760, Exon 13 of 27)	-68114	437006	nxph1	neurexophilin 1	WT to +Krt5; Hypo
0.611412	chr6	21835017	21836016	Intergenic	-52495	799361	cbx8b	chromobox homolog 8b	WT to +Krt5; Hypo
0.611536	chr16	45535593	45536592	Intron (NM_001326467, Intron 1 of 20)	46742	100151149	syngap1b	synaptic Ras GTPase activating protein 1b	WT to +Krt5; Hypo
0.611644	chr23	19317295	19318381	Intergenic	-13594	140431	guca1b	guanylate cyclase activator 1B	WT to +Krt5; Hypo
0.611663	chr6	50176678	50177690	Intron (NM_205610, Intron 2 of 9)	27819	402903	raly	RALY heterogeneous nuclear ribonucleoprotein	WT to +Krt5; Hypo
0.611896	chr16	12289800	12290799	Intron (NM_001316738, Intron 12 of 12)	55158	555566	lpcat3	lysophosphatidylcholine acyltransferase 3	WT to +Krt5; Hypo
0.611904	chr2	34046287	34047286	Intron (NM_201074, Intron 5 of 11)	-36368	30181	ptch2	patched 2	WT to +Krt5; Hypo
0.611918	chr16	3955951	3956950	Intron (NM_152981, Intron 1 of 8)	137351	195821	mtf1	metal-regulatory transcription factor 1	WT to +Krt5; Hypo
0.611927	chr14	19429383	19430382	Intergenic	-429457	259191	fmr1	fragile X mental retardation 1	WT to +Krt5; Hypo
0.612003	chr3	32763482	32764481	Intergenic	6449	767644	kat7a	K(lysine) acetyltransferase 7a	WT to +Krt5; Hypo
0.61204	chr19	5284530	5285532	Intron (NM_131523, Intron 3 of 9)	52863	58038	stx1b	syntaxin 1B	WT to +Krt5; Hypo
0.612285	chr7	48830312	48831337	Intergenic	233100	30710	igf2a	insulin-like growth factor 2a	WT to +Krt5; Hypo
0.61236	chr13	34954747	34955746	Intergenic	-222736	445168	sptlc3	serine palmitoyltransferase, long chain base subunit 3	WT to +Krt5; Hypo
0.612388	chr20	36858666	36859665	Intergenic	37937	563207	ptrhd1	peptidyl-tRNA hydrolase domain containing 1	WT to +Krt5; Hypo
0.612408	chr12	45333658	45334657	Intergenic	173292	405878	fbxl15	F-box and leucine-rich repeat protein 15	WT to +Krt5; Hypo
0.612422	chr13	10723252	10724251	Intron (NM_001142592, Intron 22 of 37)	56777	557195	lrpprc	leucine-rich pentatricopeptide repeat containing	WT to +Krt5; Hypo
0.612463	chr5	15261395	15262394	Intergenic	-57594	791580	hspb8	heat shock protein b8	WT to +Krt5; Hypo
0.6126	chr2	54530851	54531850	Intergenic	-131713	553657	rab12	RAB12, member RAS oncogene family	WT to +Krt5; Hypo
0.612773	chr11	12380039	12381038	Intergenic	14232	555814	zgc:174354	zgc:174354	WT to +Krt5; Hypo
0.612838	chr3	18354497	18355499	Intergenic	-51360	573110	cbx4	chromobox homolog 4 (Pc class homolog, Drosophila)	WT to +Krt5; Hypo
0.612852	chr11	32677003	32678002	Intergenic	-217953	561336	pcdh17	protocadherin 17	WT to +Krt5; Hypo
0.61325	chr19	26068486	26069638	TTS (NM_001256391)	3663	555634	tac1	tachykinin 1	WT to +Krt5; Hypo
0.613292	chr24	19475941	19476945	Intergenic	97215	322795	csrnp1b	cysteine-serine-rich nuclear protein 1b	WT to +Krt5; Hypo
0.613473	chr5	33716813	33717812	Intergenic	-132350	567525	fibcd1	fibrinogen C domain containing 1	WT to +Krt5; Hypo
0.613538	chr11	32267563	32268562	Intergenic	191487	561336	pcdh17	protocadherin 17	WT to +Krt5; Hypo
0.613554	chr17	36048779	36050462	Intergenic	-115418	30602	sox11a	SRY (sex determining region Y)-box 11a	WT to +Krt5; Hypo
0.613597	chr16	52362596	52363996	Intergenic	-95910	100332149	ifnlr1	interferon lambda receptor 1	WT to +Krt5; Hypo
0.613726	chr17	1300310	1301309	Intergenic	88142	100538339	dio3a	iodothyronine deiodinase 3a	WT to +Krt5; Hypo
0.613886	chr16	51611817	51612816	Intergenic	-68934	798535	si:ch211-107n13.1	si:ch211-107n13.1	WT to +Krt5; Hypo
0.614085	chr20	10119472	10120471	Exon (NM_130910, Exon 8 of 13)	11517	30066	meis2b	Meis homeobox 2b	WT to +Krt5; Hypo
0.614096	chr3	56724961	56725960	Intron (NM_001353835, Intron 56 of 67)	78344	550424	zgc:112148	zgc:112148	WT to +Krt5; Hypo
0.614165	chr5	40106067	40107172	Intergenic	27255	30147	isl1	ISL LIM homeobox 1	WT to +Krt5; Hypo
0.614253	chr6	26493373	26494372	Intergenic	75450	557661	sox14	SRY (sex determining region Y)-box 14	WT to +Krt5; Hypo
0.614261	chr13	14897442	14898441	Intron (NM_001243309, Intron 13 of 13)	24535	378964	emx1	empty spiracles homeobox 1	WT to +Krt5; Hypo
0.614376	chr19	12704629	12705932	Intergenic	23600	562734	fam210aa	family with sequence similarity 210 member Aa	WT to +Krt5; Hypo
0.614502	chr18	9093231	9094238	Intergenic	-35592	565256	grm3	glutamate receptor, metabotropic 3	WT to +Krt5; Hypo
0.614513	chr14	33124903	33125902	Intergenic	15811	541406	lamp2	lysosomal-associated membrane protein 2	WT to +Krt5; Hypo
0.614544	chr5	20912354	20913353	Intergenic	128426	797046	sh2d1aa	SH2 domain containing 1A duplicate a	WT to +Krt5; Hypo
0.614589	chr12	19963226	19964225	Intergenic	35103	794012	ubald1a	UBA-like domain containing 1a	WT to +Krt5; Hypo
0.614774	chr20	27462289	27463288	Intergenic	19764	565064	serpina10a	serpin peptidase inhibitor, clade A (alpha-1 antiproteinase, antitrypsin), member 10a	WT to +Krt5; Hypo
0.615249	chr15	21493028	21494140	Intergenic	-8317	100033621	mir100-1	microRNA 100-1	WT to +Krt5; Hypo
0.615335	chr1	7321799	7322798	Intergenic	-85771	324906	wu:fc47e11	wu:fc47e11	WT to +Krt5; Hypo
0.615365	chr9	47414606	47415605	Intergenic	-373405	403039	igfbp5b	insulin-like growth factor binding protein 5b	WT to +Krt5; Hypo
0.615483	chr12	38562366	38563365	Intergenic	-70279	100151075	abca5	ATP-binding cassette, sub-family A (ABC1), member 5	WT to +Krt5; Hypo
0.615487	chr23	27789051	27790050	Intron (NM_198874, Intron 2 of 15)	12333	321314	lmbr1l	limb development membrane protein 1-like	WT to +Krt5; Hypo
0.615527	chr11	22447924	22448923	Intergenic	-9424	30200	myog	myogenin	WT to +Krt5; Hypo
0.615618	chr1	48160233	48161232	Intergenic	420607	795785	cxcl18b	chemokine (C-X-C motif) ligand 18b	WT to +Krt5; Hypo
0.615674	chr20	48931104	48932103	Intron (NM_001077284, Intron 4 of 9)	-19323	493627	nkx2.2b	NK2 homeobox 2b	WT to +Krt5; Hypo
0.615912	chr8	13050997	13052021	Intron (NM_199565, Intron 5 of 10)	-17842	335269	itgb4	integrin, beta 4	WT to +Krt5; Hypo
0.616045	chr8	50792522	50793521	Intergenic	54447	436920	egr3	early growth response 3	WT to +Krt5; Hypo
0.616074	chr8	43155412	43156411	Intergenic	-4212	571995	ccdc92	coiled-coil domain containing 92	WT to +Krt5; Hypo
0.61622	chr15	35536960	35538370	Intergenic	142263	567225	zgc:158328	zgc:158328	WT to +Krt5; Hypo
0.616231	chr22	30531782	30532781	Intergenic	34489	796658	si:dkey-169i5.4	si:dkey-169i5.4	WT to +Krt5; Hypo
0.616308	chr8	10656430	10657429	Intergenic	237572	557500	nr1h5	nuclear receptor subfamily 1, group H, member 5	WT to +Krt5; Hypo
0.616397	chr18	9488165	9489164	Intergenic	-35866	565658	sema3e	sema domain, immunoglobulin domain (Ig), short basic domain, secreted, (semaphorin) 3E	WT to +Krt5; Hypo
0.616449	chr14	49385997	49386996	Intergenic	-128437	100498669	rxfp1	relaxin family peptide receptor 1	WT to +Krt5; Hypo
0.616494	chr21	7661318	7662317	TTS (NM_001077732)	17021	100310774	mir126b	microRNA mir-126b	WT to +Krt5; Hypo
0.616519	chr11	32479515	32480514	Intergenic	-20465	561336	pcdh17	protocadherin 17	WT to +Krt5; Hypo
0.616735	chr23	42731380	42732379	Intergenic	43972	552981	gpx7	glutathione peroxidase 7	WT to +Krt5; Hypo
0.616794	chr22	21940338	21941337	Intergenic	14938	562625	gna15.4	guanine nucleotide binding protein (G protein), alpha 15 (Gq class), tandem duplicate 4	WT to +Krt5; Hypo
0.616909	chr16	15444958	15446355	Intergenic	51683	260350	has2	hyaluronan synthase 2	WT to +Krt5; Hypo
0.617122	chr11	7647026	7648025	Intergenic	-247050	406676	adgrl4	adhesion G protein-coupled receptor L4	WT to +Krt5; Hypo
0.61715	chr14	41247520	41248519	Intron (NM_001012263, Intron 2 of 5)	38392	100148777	nitr13	novel immune-type receptor 13	WT to +Krt5; Hypo
0.617403	chr13	6803637	6804636	Intergenic	-104728	557507	aifm2	apoptosis inducing factor mitochondria associated 2	WT to +Krt5; Hypo
0.617654	chr21	9079340	9080439	Intergenic	211731	286746	sdad1	SDA1 domain containing 1	WT to +Krt5; Hypo
0.617803	chr19	37802576	37803575	Intergenic	-68415	557556	dlgap3	discs, large (Drosophila) homolog-associated protein 3	WT to +Krt5; Hypo
0.617828	chr19	37254063	37255062	Intergenic	-276865	402821	cx30.9	connexin 30.9	WT to +Krt5; Hypo
0.617999	chr23	45648111	45649110	Intergenic	-2158	494049	aimp1b	aminoacyl tRNA synthetase complex interacting multifunctional protein 1b	WT to +Krt5; Hypo
0.618104	chr19	21716707	21717706	Intergenic	-107180	369196	tshz1	teashirt zinc finger homeobox 1	WT to +Krt5; Hypo
0.618147	chr20	48060441	48061440	Intergenic	42283	335409	socs3a	suppressor of cytokine signaling 3a	WT to +Krt5; Hypo
0.618258	chr10	33749660	33750659	Intron (NM_001302248, Intron 12 of 14)	-60948	792884	rxfp2a	relaxin family peptide receptor 2a	WT to +Krt5; Hypo
0.618285	chr12	38609422	38610503	Intergenic	-23182	100151075	abca5	ATP-binding cassette, sub-family A (ABC1), member 5	WT to +Krt5; Hypo
0.618366	chr12	7152892	7153978	Intergenic	47977	790916	ipmkb	inositol polyphosphate multikinase b	WT to +Krt5; Hypo
0.618412	chr12	25280301	25281431	Intergenic	7758	333941	zfp36l2	zinc finger protein 36, C3H type-like 2	WT to +Krt5; Hypo
0.618505	chr16	3697432	3698575	Intergenic	-121096	195821	mtf1	metal-regulatory transcription factor 1	WT to +Krt5; Hypo
0.618513	chr25	36311898	36312897	Intron (NM_200913, Intron 8 of 8)	187453	393887	wwox	WW domain containing oxidoreductase	WT to +Krt5; Hypo
0.61856	chr17	40632891	40633890	Intergenic	290403	503605	supt7l	SPT7 like, STAGA complex gamma subunit	WT to +Krt5; Hypo
0.618647	chr24	27278639	27279699	Intergenic	41689	563952	ccl34b.1	chemokine (C-C motif) ligand 34b, duplicate 1	WT to +Krt5; Hypo
0.618648	chr18	2825154	2827419	Intergenic	-41121	797729	pygo1	pygopus family PHD finger 1	WT to +Krt5; Hypo
0.618679	chr2	36329729	36330728	Intergenic	200414	100331689	LOC100331689	trac-like	WT to +Krt5; Hypo
0.618872	chr20	14328155	14329154	Intergenic	110376	558674	kcns3b	potassium voltage-gated channel, delayed-rectifier, subfamily S, member 3b	WT to +Krt5; Hypo
0.618884	chr22	37107339	37108365	Intergenic	-122205	792189	si:dkey-37m8.11	si:dkey-37m8.11	WT to +Krt5; Hypo
0.61891	chr5	52582116	52583115	Intergenic	220089	798688	hint2	histidine triad nucleotide binding protein 2	WT to +Krt5; Hypo
0.618947	chr3	58796586	58797767	Intergenic	-32720	724014	luc7l3	LUC7-like 3 pre-mRNA splicing factor	WT to +Krt5; Hypo
0.619072	chr16	5163316	5164315	Intergenic	41854	569980	bckdhb	branched chain keto acid dehydrogenase E1 subunit beta	WT to +Krt5; Hypo
0.619164	chr18	38620755	38621754	Intergenic	-152761	393545	onecut1	one cut homeobox 1	WT to +Krt5; Hypo
0.619228	chr2	14629913	14631553	Intergenic	-27243	447884	tctex1d1	Tctex1 domain containing 1	WT to +Krt5; Hypo
0.619285	chr6	54006784	54007783	Intergenic	63202	664772	hyal1	hyaluronidase 1	WT to +Krt5; Hypo
0.619421	chr4	18041603	18042602	Intron (NM_001100017, Intron 12 of 25)	170333	565408	anks1b	ankyrin repeat and sterile alpha motif domain containing 1B	WT to +Krt5; Hypo
0.619544	chr20	893925	895072	Promoter-TSS (NM_212820)	-90	404209	cnr1	cannabinoid receptor 1	WT to +Krt5; Hypo
0.619572	chr15	32952067	32953066	Intergenic	12153	751741	spartb	spartin b	WT to +Krt5; Hypo
0.619623	chr16	5754470	5755537	Intergenic	-23442	791177	zgc:158689	zgc:158689	WT to +Krt5; Hypo
0.61974	chr24	39159667	39160666	Intron (NM_001045408, Intron 3 of 7)	-106130	325402	atp6v0cb	ATPase H+ transporting V0 subunit cb	WT to +Krt5; Hypo
0.619751	chr11	18955980	18956979	Intergenic	-21075	562845	rhol	rhodopsin, like	WT to +Krt5; Hypo
0.619785	chr15	22243964	22244963	Intergenic	-32335	563935	scn3b	sodium channel, voltage-gated, type III, beta	WT to +Krt5; Hypo
0.619816	chr22	1040831	1042293	Exon (NM_199966, Exon 4 of 12)	9090	335654	camk1ga	calcium/calmodulin-dependent protein kinase IGa	WT to +Krt5; Hypo
0.619856	chr14	41904399	41905398	Intergenic	99651	562031	pcdh18b	protocadherin 18b	WT to +Krt5; Hypo
0.619871	chr24	20158676	20159675	Intron (NM_001105691, Intron 1 of 12)	16886	100126011	map3k22	mitogen-activated protein kinase kinase kinase 22	WT to +Krt5; Hypo
0.619982	chr13	24185581	24186580	Intergenic	-4900	403031	rab4a	RAB4a, member RAS oncogene family	WT to +Krt5; Hypo
0.619984	chr16	20406547	20407546	Intergenic	45020	406358	hacl1	2-hydroxyacyl-CoA lyase 1	WT to +Krt5; Hypo
0.620028	chr17	24007836	24008835	Intergenic	-37278	793362	b3gnt2b	UDP-GlcNAc:betaGal beta-1,3-N-acetylglucosaminyltransferase 2b	WT to +Krt5; Hypo
0.620067	chr19	41206791	41207866	Intergenic	-13177	100033722	mir489	microRNA 489	WT to +Krt5; Hypo
0.620105	chr13	30279588	30280587	Intergenic	-96244	561061	zmiz1a	zinc finger, MIZ-type containing 1a	WT to +Krt5; Hypo
0.620145	chr16	53130053	53131052	Intron (NM_001097586, Intron 4 of 11)	18346	794221	nkd2b	NKD inhibitor of WNT signaling pathway 2b	WT to +Krt5; Hypo
0.620159	chr20	32096500	32097499	Intergenic	45127	378969	rab32a	RAB32a, member RAS oncogene family	WT to +Krt5; Hypo
0.620584	chr25	13855295	13856354	Intergenic	-65385	445124	chst1	carbohydrate (keratan sulfate Gal-6) sulfotransferase 1	WT to +Krt5; Hypo
0.620679	chr9	12069011	12070010	Intergenic	-6527	565294	znf804a	zinc finger protein 804A	WT to +Krt5; Hypo
0.620692	chr13	4737045	4738044	Intergenic	-5867	561210	micu1	mitochondrial calcium uptake 1	WT to +Krt5; Hypo
0.620824	chr12	9273826	9274825	Intron (NM_001082873, Intron 4 of 4)	6336	570857	taco1	translational activator of mitochondrially encoded cytochrome c oxidase I	WT to +Krt5; Hypo
0.620885	chr21	1727652	1728651	Intergenic	45287	553510	st8sia3	ST8 alpha-N-acetyl-neuraminide alpha-2,8-sialyltransferase 3	WT to +Krt5; Hypo
0.620955	chr20	46161665	46162664	Intergenic	3725	794997	taar12g	trace amine associated receptor 12g	WT to +Krt5; Hypo
0.621058	chr19	3846367	3847366	Exon (NM_001123051, Exon 8 of 11)	1600	246711	bty	bloodthirsty	WT to +Krt5; Hypo
0.621075	chr16	47182943	47184363	Intergenic	-94721	100148066	LOC100148066	neurexophilin 1	WT to +Krt5; Hypo
0.621078	chr5	66081570	66082569	Intergenic	-11639	503731	kat5b	K(lysine) acetyltransferase 5b	WT to +Krt5; Hypo
0.62109	chr14	9851620	9852619	Intron (NM_001142584, Intron 1 of 9)	102393	100149452	il1rapl2	interleukin 1 receptor accessory protein-like 2	WT to +Krt5; Hypo
0.621173	chr19	48332027	48333026	Intron (NM_001001889, Intron 8 of 14)	14436	324004	ctnnb2	catenin, beta 2	WT to +Krt5; Hypo
0.621175	chr5	40672489	40673740	Intron (NM_001102673, Intron 3 of 7)	34283	569395	npr3	natriuretic peptide receptor 3	WT to +Krt5; Hypo
0.621211	chr14	6474266	6475265	Intergenic	-165189	30722	rack1	receptor for activated C kinase 1	WT to +Krt5; Hypo
0.621225	chr3	37404931	37405930	Intergenic	24313	399477	arf2a	ADP-ribosylation factor 2a	WT to +Krt5; Hypo
0.621279	chr4	12116448	12117448	Intron (NM_001002396, Intron 2 of 4)	4537	436669	tmem178b	transmembrane protein 178B	WT to +Krt5; Hypo
0.621333	chr6	20021084	20022083	Intron (NM_001198772, Intron 6 of 22)	12705	100526683	aldh1l1	aldehyde dehydrogenase 1 family, member L1	WT to +Krt5; Hypo
0.621389	chr8	34194333	34195332	Intergenic	-117809	58140	pbx3b	pre-B-cell leukemia homeobox 3b	WT to +Krt5; Hypo
0.621465	chr25	33100414	33101413	Intergenic	-263372	564951	roraa	RAR-related orphan receptor A, paralog a	WT to +Krt5; Hypo
0.621672	chr6	41949085	41950084	Intergenic	-10160	100001530	oxtr	oxytocin receptor	WT to +Krt5; Hypo
0.621718	chr5	44358973	44359972	Intron (NM_205628, Intron 3 of 4)	14847	402923	dmrt1	doublesex and mab-3 related transcription factor 1	WT to +Krt5; Hypo
0.621726	chr3	5815875	5816874	Intergenic	-82236	406249	ddx39ab	DEAD (Asp-Glu-Ala-Asp) box polypeptide 39Ab	WT to +Krt5; Hypo
0.621995	chr3	42598713	42599712	Intergenic	-69349	393489	zfand2a	zinc finger, AN1-type domain 2A	WT to +Krt5; Hypo
0.622214	chr23	20428454	20429453	Intergenic	-67379	58082	tnnc2	troponin C type 2 (fast)	WT to +Krt5; Hypo
0.622316	chr2	20763274	20764273	Intergenic	-50405	567798	agla	amylo-alpha-1, 6-glucosidase, 4-alpha-glucanotransferase a	WT to +Krt5; Hypo
0.622365	chr18	44738645	44739658	Intergenic	-36366	393639	ilvbl	ilvB (bacterial acetolactate synthase)-like	WT to +Krt5; Hypo
0.622937	chr12	23856393	23857410	Intergenic	-13519	553346	psme4b	proteasome activator subunit 4b	WT to +Krt5; Hypo
0.623029	chr14	820084	821083	Intergenic	48681	266754	adra2da	adrenergic, alpha-2D-, receptor a	WT to +Krt5; Hypo
0.623035	chr14	29528761	29529760	Intergenic	-69565	561865	pdlim3b	PDZ and LIM domain 3b	WT to +Krt5; Hypo
0.623052	chr2	15966119	15967118	Intergenic	22445	406539	amy2a	amylase alpha 2A (pancreatic)	WT to +Krt5; Hypo
0.623169	chr16	18856279	18857278	Intergenic	126729	30486	rxrbb	retinoid x receptor, beta b	WT to +Krt5; Hypo
0.623265	chr17	9651902	9652901	Intergenic	121592	406602	egln3	egl-9 family hypoxia-inducible factor 3	WT to +Krt5; Hypo
0.623274	chr16	48261715	48262714	Intergenic	196418	445306	eif3ha	eukaryotic translation initiation factor 3, subunit H, a	WT to +Krt5; Hypo
0.623388	chr23	22200467	22201631	Intron (NM_152958, Intron 1 of 14)	3178	171465	phc2a	polyhomeotic homolog 2a (Drosophila)	WT to +Krt5; Hypo
0.623534	chr13	19826766	19827765	Intergenic	-158471	436809	fam204a	family with sequence similarity 204 member A	WT to +Krt5; Hypo
0.623742	chr25	35602172	35603209	Exon (NM_001001405, Exon 1 of 3)	111	405792	irx5b	iroquois homeobox 5b	WT to +Krt5; Hypo
0.623808	chr20	25265081	25266080	Intergenic	-60608	570584	moxd1	monooxygenase, DBH-like 1	WT to +Krt5; Hypo
0.623864	chr9	1995772	1996771	Intergenic	-5633	30479	evx2	even-skipped homeobox 2	WT to +Krt5; Hypo
0.624009	chr12	15809454	15810453	Intergenic	185311	562651	nmt1b	N-myristoyltransferase 1b	WT to +Krt5; Hypo
0.624029	chr18	49309212	49310211	Intergenic	56099	492462	yif1b	Yip1 interacting factor homolog B (S. cerevisiae)	WT to +Krt5; Hypo
0.6241	chr10	33732115	33733230	Intron (NM_001302248, Intron 11 of 14)	50188	564156	b3glctb	beta 3-glucosyltransferase b	WT to +Krt5; Hypo
0.624148	chr1	49265341	49266340	TTS (NM_001003515)	9201	445121	hadh	hydroxyacyl-CoA dehydrogenase	WT to +Krt5; Hypo
0.624265	chr6	12563194	12564193	Exon (NM_001039817, Exon 13 of 13)	52793	562822	bmpr2a	bone morphogenetic protein receptor, type II a (serine/threonine kinase)	WT to +Krt5; Hypo
0.624311	chr18	16655587	16656586	Intergenic	-70674	334618	eif4g2b	eukaryotic translation initiation factor 4, gamma 2b	WT to +Krt5; Hypo
0.624455	chr13	34557156	34558158	Intergenic	-6495	566980	tasp1	taspase, threonine aspartase, 1	WT to +Krt5; Hypo
0.624856	chr17	5174038	5175217	Intron (NM_001002625, Intron 2 of 11)	-20199	405784	runx2a	RUNX family transcription factor 2a	WT to +Krt5; Hypo
0.624877	chr11	15816646	15817645	Intron (NM_001033727, Intron 1 of 6)	20592	619245	draxin	dorsal inhibitory axon guidance protein	WT to +Krt5; Hypo
0.62493	chr3	52763184	52764380	Intron (NM_131447, Intron 2 of 7)	18483	30728	pbx4	pre-B-cell leukemia transcription factor 4	WT to +Krt5; Hypo
0.624985	chr5	27335593	27336596	Exon (NM_001166628, Exon 12 of 13)	37939	767749	adam28	ADAM metallopeptidase domain 28	WT to +Krt5; Hypo
0.625079	chr15	44144435	44145894	Intergenic	-15872	449909	zgc:165514	zgc:165514	WT to +Krt5; Hypo
0.625127	chr13	2903955	2904954	Intergenic	117440	559418	pkdcca	protein kinase domain containing, cytoplasmic a	WT to +Krt5; Hypo
0.62516	chr25	32779994	32781136	Exon (NM_001020593, Exon 6 of 6)	9900	553619	lactb	lactamase, beta	WT to +Krt5; Hypo
0.625205	chr5	51658882	51659881	Intergenic	-28331	414273	rgmb	repulsive guidance molecule BMP co-receptor b	WT to +Krt5; Hypo
0.625248	chr6	42574696	42575695	Intergenic	-154566	322041	ip6k2a	inositol hexakisphosphate kinase 2a	WT to +Krt5; Hypo
0.625251	chr9	6307572	6308571	Intron (NM_173242, Intron 2 of 14)	30123	192315	uxs1	UDP-glucuronate decarboxylase 1	WT to +Krt5; Hypo
0.625268	chr10	36058079	36059078	Intergenic	-24246	321622	hmgb1a	high mobility group box 1a	WT to +Krt5; Hypo
0.625395	chr23	36530390	36531389	Promoter-TSS (NM_001020478)	-31	323641	gpr182	G protein-coupled receptor 182	WT to +Krt5; Hypo
0.625726	chr2	571137	572165	Intergenic	-194705	405856	wrnip1	WRN helicase interacting protein 1	WT to +Krt5; Hypo
0.625749	chr16	49074967	49075966	Intergenic	-302317	797793	si:dkey-82o10.4	si:dkey-82o10.4	WT to +Krt5; Hypo
0.625806	chr11	19721274	19722273	Intergenic	-108933	324211	namptb	nicotinamide phosphoribosyltransferase b	WT to +Krt5; Hypo
0.625856	chr1	28133273	28134272	Intron (NM_213047, Intron 6 of 20)	12762	266990	pwp2h	PWP2 small subunit processome component	WT to +Krt5; Hypo
0.625913	chr6	5809150	5810149	Intergenic	282041	447816	rtn4a	reticulon 4a	WT to +Krt5; Hypo
0.625988	chr17	9420406	9421821	Intergenic	352880	406602	egln3	egl-9 family hypoxia-inducible factor 3	WT to +Krt5; Hypo
0.626016	chr13	39957503	39958601	Intergenic	-136607	117510	sfrp5	secreted frizzled-related protein 5	WT to +Krt5; Hypo
0.626043	chr8	44864513	44865512	Intergenic	45777	550393	praf2	PRA1 domain family, member 2	WT to +Krt5; Hypo
0.626085	chr18	28154294	28155293	Intergenic	206194	569156	hipk3b	homeodomain interacting protein kinase 3b	WT to +Krt5; Hypo
0.626118	chr22	12590882	12591881	Intron (NM_001114576, Intron 8 of 17)	9898	100136857	cep70	centrosomal protein 70	WT to +Krt5; Hypo
0.626297	chr15	38844932	38845931	Intergenic	-112940	60309	robo2	roundabout, axon guidance receptor, homolog 2 (Drosophila)	WT to +Krt5; Hypo
0.626581	chr18	17367352	17368351	Intron (NM_001039460, Intron 1 of 8)	42385	407655	zfpm1	zinc finger protein, FOG family member 1	WT to +Krt5; Hypo
0.626618	chr18	45876886	45877885	Exon (NM_001348188, Exon 5 of 11)	11012	100535895	rnpepl1	arginyl aminopeptidase like 1	WT to +Krt5; Hypo
0.626674	chr14	8441571	8442721	Intergenic	66257	553790	trmt112	tRNA methyltransferase subunit 11-2	WT to +Krt5; Hypo
0.626839	chr16	6762819	6763932	Intergenic	-46694	572232	znf236	zinc finger protein 236	WT to +Krt5; Hypo
0.627112	chr8	24412966	24413965	Intergenic	153179	406397	mmp9	matrix metallopeptidase 9	WT to +Krt5; Hypo
0.627134	chr14	6606412	6607656	Intergenic	-32920	30722	rack1	receptor for activated C kinase 1	WT to +Krt5; Hypo
0.627222	chr7	69568007	69569006	Intergenic	47831	393873	myoz2a	myozenin 2a	WT to +Krt5; Hypo
0.627265	chr2	25801956	25803033	Intron (NM_001159832, Intron 5 of 24)	79671	572313	fndc3ba	fibronectin type III domain containing 3Ba	WT to +Krt5; Hypo
0.627277	chr5	7770332	7771331	Intergenic	79205	550238	lmbrd2a	LMBR1 domain containing 2a	WT to +Krt5; Hypo
0.627382	chr2	42340071	42341070	Intergenic	-1604	552940	cavin4a	caveolae associated protein 4a	WT to +Krt5; Hypo
0.627518	chr6	30772210	30773209	Intergenic	55624	566602	insl5a	insulin-like 5a	WT to +Krt5; Hypo
0.627709	chr3	61953801	61954800	Intron (NM_001007402, Intron 6 of 19)	3722	492761	tbl3	transducin (beta)-like 3	WT to +Krt5; Hypo
0.627716	chr6	4329919	4330918	Intergenic	-49438	58057	pou4f1	POU class 4 homeobox 1	WT to +Krt5; Hypo
0.628016	chr19	41004917	41005920	Intron (NM_001365105, Intron 22 of 27)	188733	100033722	mir489	microRNA 489	WT to +Krt5; Hypo
0.628058	chr15	39280274	39281273	Intron (NM_131633, Intron 8 of 29)	322402	60309	robo2	roundabout, axon guidance receptor, homolog 2 (Drosophila)	WT to +Krt5; Hypo
0.628151	chr20	10411199	10412327	Intergenic	88884	406294	glrx5	glutaredoxin 5 homolog (S. cerevisiae)	WT to +Krt5; Hypo
0.628183	chr21	23329475	23331062	Intron (NM_131202, Intron 15 of 17)	-59105	323269	zbtb16a	zinc finger and BTB domain containing 16a	WT to +Krt5; Hypo
0.628223	chr21	34820892	34821891	Intron (NM_200933, Intron 5 of 15)	6458	393907	cdc23	CDC23 (cell division cycle 23, yeast, homolog)	WT to +Krt5; Hypo
0.62825	chr6	50157808	50158807	Intron (NM_205610, Intron 2 of 9)	46696	402903	raly	RALY heterogeneous nuclear ribonucleoprotein	WT to +Krt5; Hypo
0.628322	chr5	47655117	47656116	Intergenic	-46982	798771	mef2cb	myocyte enhancer factor 2cb	WT to +Krt5; Hypo
0.628357	chr2	14937364	14938363	Intergenic	50217	550484	leprot	leptin receptor overlapping transcript	WT to +Krt5; Hypo
0.628404	chr6	15886048	15887123	Intergenic	-17661	245948	gbx2	gastrulation brain homeobox 2	WT to +Krt5; Hypo
0.628535	chr17	19658462	19659461	Intron (NM_001002541, Intron 2 of 17)	48525	436814	rgs7a	regulator of G protein signaling 7a	WT to +Krt5; Hypo
0.628844	chr4	30795894	30796893	Intergenic	-49949	100137116	zgc:172014	zgc:172014	WT to +Krt5; Hypo
0.628853	chr3	45478466	45479465	Intergenic	-58012	767746	zgc:153426	zgc:153426	WT to +Krt5; Hypo
0.628855	chr5	58978660	58979659	Intergenic	95189	568626	dtx2	deltex 2, E3 ubiquitin ligase	WT to +Krt5; Hypo
0.628921	chr11	22258310	22259309	Intron (NM_001100151, Intron 1 of 28)	44200	100005543	ppfia4	PTPRF interacting protein alpha 4	WT to +Krt5; Hypo
0.629204	chr20	22734327	22735327	Intergenic	-32078	561226	lnx1	ligand of numb-protein X 1	WT to +Krt5; Hypo
0.629408	chr5	49365387	49366534	Intron (NM_200418, Intron 5 of 9)	65841	393390	fam172a	family with sequence similarity 172 member A	WT to +Krt5; Hypo
0.629528	chr11	17085756	17086755	Intergenic	493097	768127	tafa4b	TAFA chemokine like family member 4b	WT to +Krt5; Hypo
0.629532	chr3	37106431	37108343	Intergenic	-100638	554119	mlx	MAX dimerization protein MLX	WT to +Krt5; Hypo
0.629552	chr6	40999888	41000887	Intron (NM_001144052, Intron 2 of 4)	5040	100034402	tgfa	transforming growth factor, alpha	WT to +Krt5; Hypo
0.629657	chr11	598180	599179	Exon (NM_131467, Exon 5 of 9)	-28672	767713	tsen2	TSEN2 tRNA splicing endonuclease subunit	WT to +Krt5; Hypo
0.629664	chr20	13812441	13813440	Intron (NM_001365334, Intron 1 of 13)	13672	447809	tagapb	T cell activation RhoGTPase activating protein b	WT to +Krt5; Hypo
0.629841	chr16	4872953	4873952	Intron (NM_001017852, Intron 7 of 9)	7655	550550	mecr	mitochondrial trans-2-enoyl-CoA reductase	WT to +Krt5; Hypo
0.629868	chr7	71368659	71369658	Intergenic	62552	259257	adcyap1a	adenylate cyclase activating polypeptide 1a	WT to +Krt5; Hypo
0.629872	chr2	42230647	42231646	Intergenic	29011	404618	adhfe1	alcohol dehydrogenase iron containing 1	WT to +Krt5; Hypo
0.629968	chr11	23490034	23491033	Intergenic	-81758	100141490	nfasca	neurofascin homolog (chicken) a	WT to +Krt5; Hypo
0.629975	chr25	27414093	27415092	Intergenic	-37956	447877	lmod2a	leiomodin 2 (cardiac) a	WT to +Krt5; Hypo
0.630147	chr18	5915867	5916971	Intergenic	-94139	794623	cplx3b	complexin 3b	WT to +Krt5; Hypo
0.63028	chr17	36060690	36061689	Intergenic	-126987	30602	sox11a	SRY (sex determining region Y)-box 11a	WT to +Krt5; Hypo
0.630437	chr20	21043727	21044726	Intron (NM_199889, Intron 9 of 18)	-11117	553533	btbd6b	BTB (POZ) domain containing 6b	WT to +Krt5; Hypo
0.630438	chr18	16278064	16279164	Intergenic	20874	565176	alx1	ALX homeobox 1	WT to +Krt5; Hypo
0.63044	chr23	33396184	33397183	Intergenic	27776	100003708	si:ch211-226m16.2	si:ch211-226m16.2	WT to +Krt5; Hypo
0.630626	chr15	35790293	35791295	Intergenic	-284331	550277	rhbdd1	rhomboid domain containing 1	WT to +Krt5; Hypo
0.630639	chr4	1578219	1579228	Intergenic	-81872	368260	nap1l1	nucleosome assembly protein 1-like 1	WT to +Krt5; Hypo
[truncated: 4,775 more rows]
