# Supplementary material for: Keratin5-BMP4 Mechanosignaling Network Regulates Cell Cytoskeletal Reorganization and Chromatin Accessibility during Revascularization-Based Blastema Regeneration
Source: Preprints.org preprint supplement (doi:10.20944/preprints202104.0642.v1), 2021-04-23
Supplement: Supplementary file 9 [file Table S8 Mass spectrometry identifications of affinity purified 6-His-Krt5 and:or Noggin-Fc protein complex.xlsx]

## Sheet: Table S8
Table S8 Mass spectrometry identifications of affinity purified 6-His-Krt5 and/or Noggin-Fc protein complex
6-HiS-Krt5 treated and Ni-TAT purification
N	Unused	%Cov(95)	Accession	Gene	Description	Mw(kD)	Equivalents	Others	Peptides(95%)	Spectra
	126.13	42.17	F1QC64	myh9b	Myosin, heavy chain 9b, non-muscle OS=Danio rerio OX=7955 GN=myh9b PE=1 SV=3	197.534			70	95
2	99.43	54.88	B8JHU4	actn1	Actinin, alpha 1 OS=Danio rerio OX=7955 GN=actn1 PE=1 SV=1	104.205			60	109
3	84.15	32.18	F1R3G4	myh10	Myosin, heavy chain 10, non-muscle OS=Danio rerio OX=7955 GN=myh10 PE=3 SV=1	231.163		I3ISA3	53	66
4	59.06	16.27	F1QS89	cad	Carbamoyl-phosphate synthetase 2, aspartate transcarbamylase, and dihydroorotase OS=Danio rerio OX=7955 GN=cad PE=1 SV=2	247.355	U3JAV8	Q5RHG8	27	30
5	47.18	26.8	A0A0R4IM29	golga2	Golgin A2 OS=Danio rerio OX=7955 GN=golga2 PE=1 SV=1	120.773	A1IH00;F1QG02		26	32
6	46.2	29.4	Q5RHQ7	hnrnpub	Heterogeneous nuclear ribonucleoprotein Ub OS=Danio rerio OX=7955 GN=hnrnpub PE=1 SV=1	88.55			26	43
7	44.13	41.47	F1QTB5	rpn1	Dolichyl-diphosphooligosaccharide--protein glycosyltransferase subunit 1 OS=Danio rerio OX=7955 GN=rpn1 PE=1 SV=1	67.658			23	32
8	41.41	38	Q6P3L3	hspa5	Heat shock protein 5 OS=Danio rerio OX=7955 GN=hspa5 PE=1 SV=1	71.991			20	27
9	40.72	24.3	B7ZUU8	ap3d1	Adaptor-related protein complex 3, delta 1 subunit OS=Danio rerio OX=7955 GN=ap3d1 PE=1 SV=1	140.23	F6PA07		23	31
10	40.44	9.545	A0A0R4IR77	trioa	Trio Rho guanine nucleotide exchange factor a OS=Danio rerio OX=7955 GN=trioa PE=1 SV=1	348.103	J9JI09	Q1LUA6	19	24
6-HiS-Krt5 plus Noggin-Fc treated and Ni-TAT purification
1	102.18	34.92	F1QC64	myh9b	Myosin, heavy chain 9b, non-muscle OS=Danio rerio OX=7955 GN=myh9b PE=1 SV=3	197.534			52	66
2	83.75	49.56	B8JHU4	actn1	Actinin, alpha 1 OS=Danio rerio OX=7955 GN=actn1 PE=1 SV=1	104.205			50	88
3	67.03	25.25	F1R3G4	myh10	Myosin, heavy chain 10, non-muscle OS=Danio rerio OX=7955 GN=myh10 PE=3 SV=1	231.163		I3ISA3	38	43
4	63.06	16.41	F1QS89	cad	Carbamoyl-phosphate synthetase 2, aspartate transcarbamylase, and dihydroorotase OS=Danio rerio OX=7955 GN=cad PE=1 SV=2	247.355	U3JAV8	Q5RHG8	32	38
5	43.45	25.13	Q5RHQ7	hnrnpub	Heterogeneous nuclear ribonucleoprotein Ub OS=Danio rerio OX=7955 GN=hnrnpub PE=1 SV=1	88.55			21	28
6	39.36	36.15	Q6P3L3	hspa5	Heat shock protein 5 OS=Danio rerio OX=7955 GN=hspa5 PE=1 SV=1	71.991			19	28
7	37.6	21.42	A0A0R4IFJ4	pcxa	Pyruvate carboxylase OS=Danio rerio OX=7955 GN=pcxa PE=1 SV=1	129.868			18	19
8	37.1	10.29	F1QH12	acaca	Acetyl-CoA carboxylase alpha OS=Danio rerio OX=7955 GN=acaca PE=1 SV=2	269.388	F6P055		18	19
9	36.63	33.15	A0A0R4IUG7	glud1a	Glutamate dehydrogenase 1a OS=Danio rerio OX=7955 GN=glud1a PE=1 SV=1	60.359	B8A4B0		21	34
10	36.63	39.97	F1QTB5	rpn1	Dolichyl-diphosphooligosaccharide--protein glycosyltransferase subunit 1 OS=Danio rerio OX=7955 GN=rpn1 PE=1 SV=1	67.658			23	28
11	35.12	32.87	A0A0R4IMF8	hspa8	Heat shock cognate 71 kDa protein OS=Danio rerio OX=7955 GN=hspa8 PE=1 SV=1	71.21	A0A0R4IVB0;Q6NYR4		19	29
Noggin-Fc treated and Protein A/G purification
N	Unused	%Cov(95)	Accession	Gene	Description	Mw(kD)	Equivalents	Others	Peptides(95%)	Spectra
1	98.03	29.51	F1QC64	myh9b	Myosin, heavy chain 9b, non-muscle OS=Danio rerio OX=7955 GN=myh9b PE=1 SV=3	197.534	F1QJK4		49	74
2	67.78	23.19	F1R3G4	myh10	Myosin, heavy chain 10, non-muscle OS=Danio rerio OX=7955 GN=myh10 PE=3 SV=1	231.163		I3ISA3	41	46
3	33.65	47.2	Q7ZVF9	actbb	Actin, cytoplasmic 2 OS=Danio rerio OX=7955 GN=actbb PE=2 SV=2	41.753	Q7ZVI7		19	52
4	28.56	26.7	A0A0R4IMF8	hspa8	Heat shock cognate 71 kDa protein OS=Danio rerio OX=7955 GN=hspa8 PE=1 SV=1	71.21	A0A0R4IVB0;Q6NYR4		14	15
6-HiS-Krt5 plus Noggin-Fc treated and Protein A/G purification
1	21.81	8.952	F1QC64	myh9b	Myosin, heavy chain 9b, non-muscle OS=Danio rerio OX=7955 GN=myh9b PE=1 SV=3	197.534	F1QJK4		10	11
2	15	30.67	Q7ZVF9	actbb	Actin, cytoplasmic 2 OS=Danio rerio OX=7955 GN=actbb PE=2 SV=2	41.753	Q7ZVI7		8	12
3	8.54	3.715	F1R3G4	myh10	Myosin, heavy chain 10, non-muscle OS=Danio rerio OX=7955 GN=myh10 PE=3 SV=1	231.163	I3ISA3		6	6
