# Supplementary material for: Keratin5-BMP4 Mechanosignaling Network Regulates Cell Cytoskeletal Reorganization and Chromatin Accessibility during Revascularization-Based Blastema Regeneration
Source: Preprints.org preprint supplement (doi:10.20944/preprints202104.0642.v1), 2021-04-23
Supplement: Supplementary file 10 [file Table S9 Antibodies, primers and other agents used in this study.xlsx]

## Sheet: Table S9
Table S9 Antibodies, primers and other agents used in this study
Antibody	cat #	Company	Production
phosphorylated ERK1+ERK2(Phospho T202+Y204)	ab76165	Abcam	New Territories, HK
MEK-1/2 antibody	sc-436	Santa Cruz Biotechnology, Inc.	Santa Cruz, CA, USA
phosphorylated MEK-1/2	sc-7995	Santa Cruz Biotechnology, Inc.	Santa Cruz, CA, USA
GFP	sc-9996	Santa Cruz Biotechnology, Inc.	Santa Cruz, CA, USA
Pou5f1	LS-C182402	Lifespan Biosciences, Inc	Seattle, WA, USA
Goat polyclonal secondary antibody to rabbit IgG (H&L (FITC)	ab6717	Abcam	New Territories, HK
Goat polyclonal secondary antibody to mouse IgG (H&L (TR)	ab6787	Abcam	New Territories, HK
Donkey anti-rabbit IgG, AP conjugated	CW0217	Beijing CoWin Biotech Co., Ltd	Beijing, China
BCIP/NBT kit	(CW0051)	Beijing CoWin Biotech Co., Ltd	Beijing, China
DyLight594 rabbit anti-goat IgG(H+L)	RAG5942	MultiScience Biotech Co. Ltd	Hangzhou, Zejiang, China
Dylight549 goat anti-rabbit IgG (H+L)	GAR5492	MultiScience Biotech Co. Ltd	Hangzhou, Zejiang, China
Fluoroshield with DAPI	F6057-20ml	Sigma	St. Louis, MI, USA
Histone H3 (phospho S10)	ab5176	Abcam	New Territories, HK
H3K27Ac	ab4729	Abcam	New Territories, HK
H3K9Ac	ab4441	Abcam	New Territories, HK
Dnmt1	ab13537	Abcam	New Territories, HK
5-Methyl Cytidine antibody[33D3]	ab10805	abcam	mouse
Histone H3(tri methyl K27)antibody-ChIP Grade	ab6002	abcam	mouse
Histone H3(tri methyl K4)antibody-ChIP Grade	ab1012	abcam	mouse
Histone H3	ab85869	abcam	rabbit
Histone H3(tri methyl K36)-ChIP Grade	ab9050	abcam	rabbit
Histone H3(phospho S10)-Mitosis Marker	ab5176	abcam	rabbit
Histone H3(tri methyl K9)-ChIP Grade	ab8898	abcam	rabbit
Histone H3(acetyl K27)-ChIP Grade	ab4729	abcam	rabbit
Histone H3(acetyl K9)-ChIP Grade	ab4441	abcam	rabbit
Dnmt1-ChIP Grade	ab13537	abcam	mouse
Acety-histone H3(Lys9) (C5B11) rabibit mAb	#9649	Cell signaling	Danvers, MA, USA
Tri-methyl-histone H3(lys9) (D4W1U) rabbit mAb	#13969	Cell signaling	Danvers, MA, USA
Pax3a	LS-C182382	Lifespan Biosciences, Inc	Seattle, WA, USA
α-SMA	ab5694	Abcam	New Territories, HK
Isl1	ab20670	Abcam	New Territories, HK
Anti-phospho Smad1/Smad5/Smad8（Ser463/465）	ab3848-I	EMD Millipore	Temecula, CA, USA
Cytokeratin 5 Mouse Monoclonal antibody	66727-1-Ig	Proteintech	Rosemont, IL, USA
Alexa Fluor 488 AffiniPure Goat Anti-Rabbit IgG (H+L)	33106ES60	Yeasen	Shanghai, China
Alexa Fluor 594-AffiniPure Goat Anti-Mouse IgG (H+L)	33212ES60	Yeasen	Shanghai, China
RECOMBINANT HUMAN KRT5 (N-6 His)	Ag24194	Proteintech	Rosemont, IL, USA
ReCOMBINANT HUMAN Noggin (C-Fc)		Novoprotein	Shanghai, China
Primers for RT-PCR
gene	Forward	Reverse
kdrl	GAGTTTCATGTCCCGAGCGA	GGACCGATCAGACTTCTGGC
pax3a	GGGCTTCATTTGGATTGGTGG	TGAACAAGGTGGCTAATTGCAT
acta2	CCAACAATGTGCTGTCTGGC	TAGAGGGTCCGGCTTCATCA
bmp3	GTGGTGTCCACCCTTCAGAG	GTTCTTGCGAGGCTTCTTGC
bmp4	CAGCACGTCAGCTTCGACTA	GATCTGGGTCTGAGAAGGCG
esco2	GCAGTTTGGAGCCACTACCT	CGTGGCGTACTTGGGATCAT
tbl1xr1a	CTGGCCAGGTAAGGTCCAG	AGAGCAAGTAGCAGCAGGTT
kdm7aa	CAGGACAGAGTCGCCACATT	GTGTTGGGTGAGGTAGGACG
kdm7ab	GCGAGGTCCCAGACCATATC	TTTAGGGCCGTGAAGGCGT
phf8	AGTTCAGTGGTGGGCACATT	CAGGCTAAACAACTCTTATGCTGT
Primers for ChIP-PCR
pax3a-P1	ATGAACGGGGCCTGTTTGAC	GTGGAGACCAACACAATTGC
pax3a-P2	ATTCGGGGTTTGCATGGGAT	CTGGAAGCCCCTCCAAAAGT
pax3a-P3	GGAACAACGTTAAGATCCAT	AAAGACCTGGGAAAGCCTGC
caspa3-P1	CCCATGAGCCCATATTCACAA	GTTCATTCCGTTGTGGCAACT
Caspa3-P2	CGATGGTTTGATCTGTAGAC	TATGTTCACCGCAAAACAGG
caspa3-P3	TTTTTTGGTGTGAACATGGC	GCGGGCGATATGGCAAGTAA
flk1-P1	GAACAGACCATGAACAATAC	ATACAGAACTCTGGTCACAC
flk1-P2	ATGGTGACGTTGCGTCCTTC	CCCCGGTACTAAGACGAATGG
flk1-P3	TCGTCTTAGTACCGGGGCA	ACGTCCCGAATGATACTCCG
acta2-P1	CTGGCTCGCCTTCTTCTGTT	AGGATGGTTCACTTTTCATC
acta2-P2	GTCAAGGCTTTGTAACCGCC	TGGGGACTTCACTATGCACG
acta2-P3	GAGGAGAAAAAAGGAAAAGG	GTGATGGTGTACACCTCACT
foxo1b-P1	TGAACCTTACGCCGTCATTCA	GATTTGTGGTTTGTGGCGCA
foxo1b-P2	ACCACAAATCTGCTGCTTGA	ACGTTTGCATAACCCACGCTA
foxo1b-P3	CGCGCTTCATAACTGGCATT	GGCTCAAAATCCGGGTCGAT
