# Supplementary figures and images for: Keratin5-BMP4 Mechanosignaling Network Regulates Cell Cytoskeletal Reorganization and Chromatin Accessibility during Revascularization-Based Blastema Regeneration
Source: Preprints.org preprint supplement (doi:10.20944/preprints202104.0642.v1), 2021-04-23

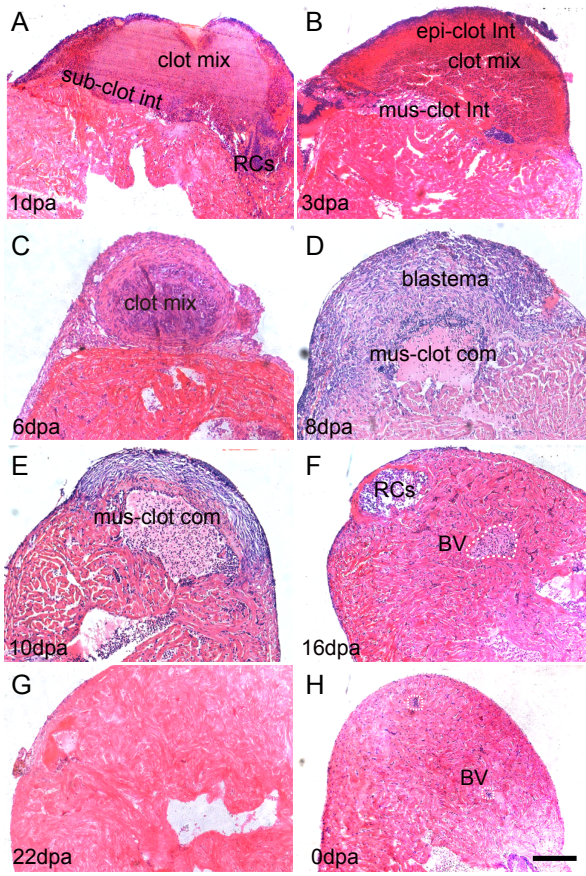

Supplement: Supplementary file 1 [file Figure S1.pdf › Figure S1.pdf]

DMSO

BA

flk1-GFP/H3K9Me3

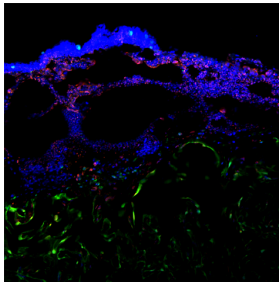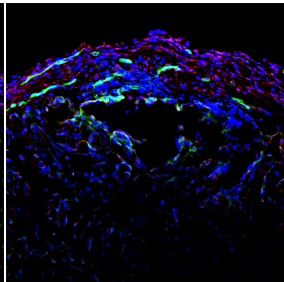

flk1-GFP/H3K9Ac

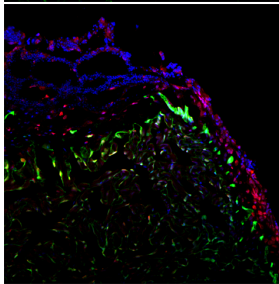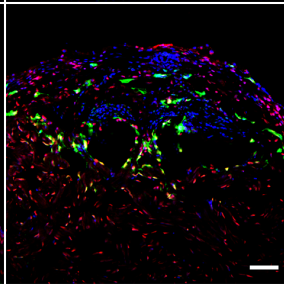

Supplement: Supplementary file 2 [file Figure S10.pdf › Figure S10.pdf]

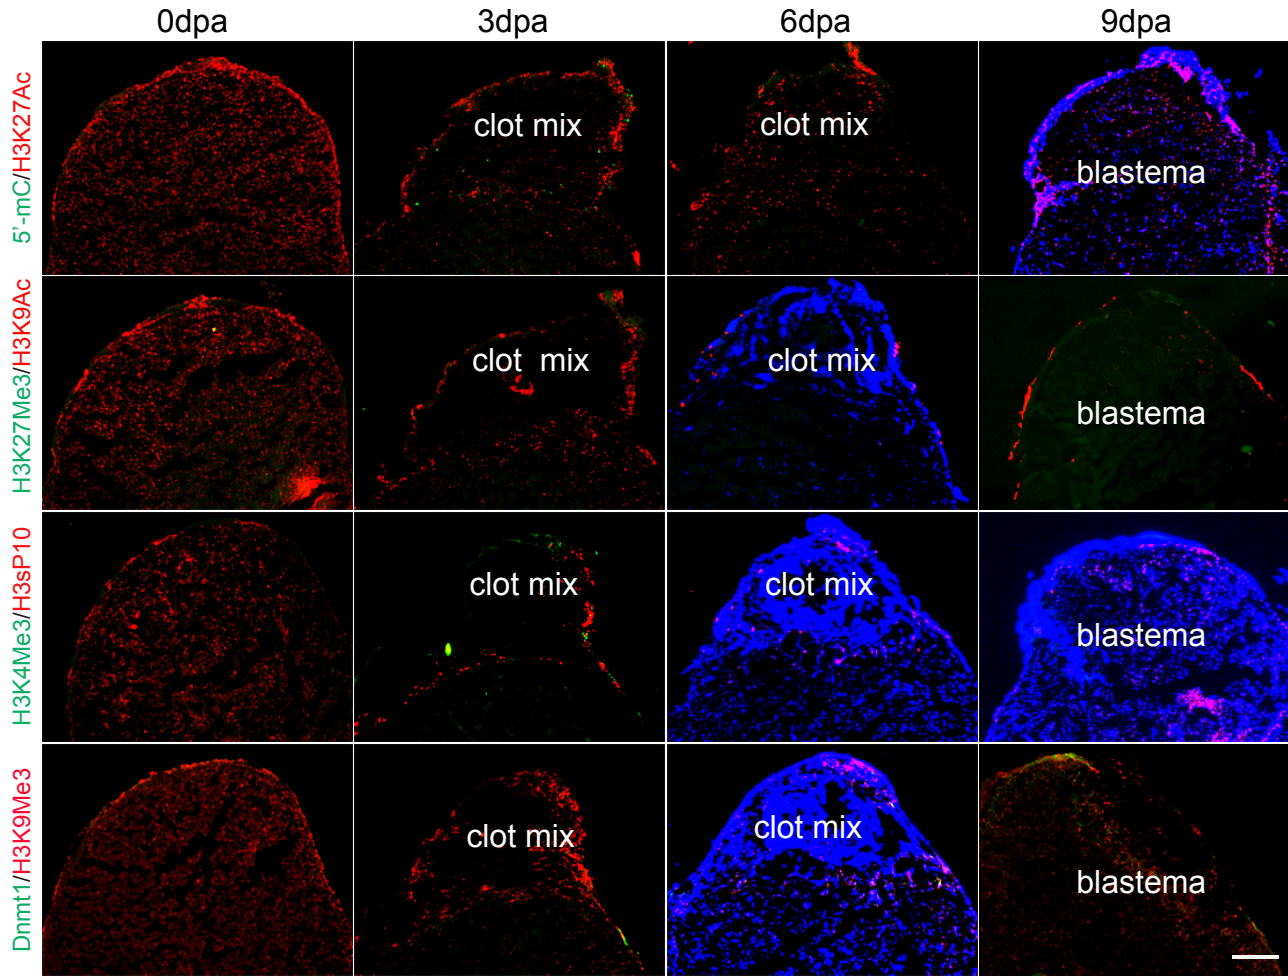

Supplement: Supplementary file 3 [file Figure S2.pdf › Figure S2.pdf]

6dpa

9dpa

H3K9M3

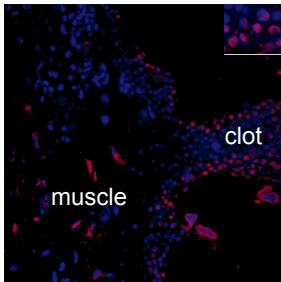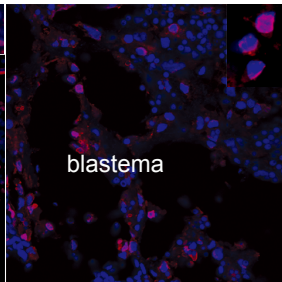

H3K9Ac

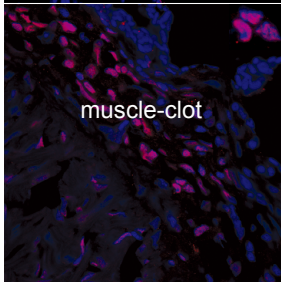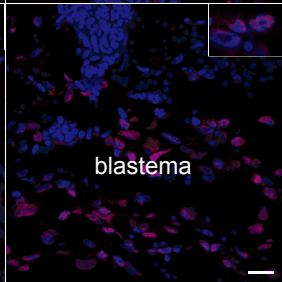

Supplement: Supplementary file 4 [file Figure S3.pdf › Figure S3.pdf]

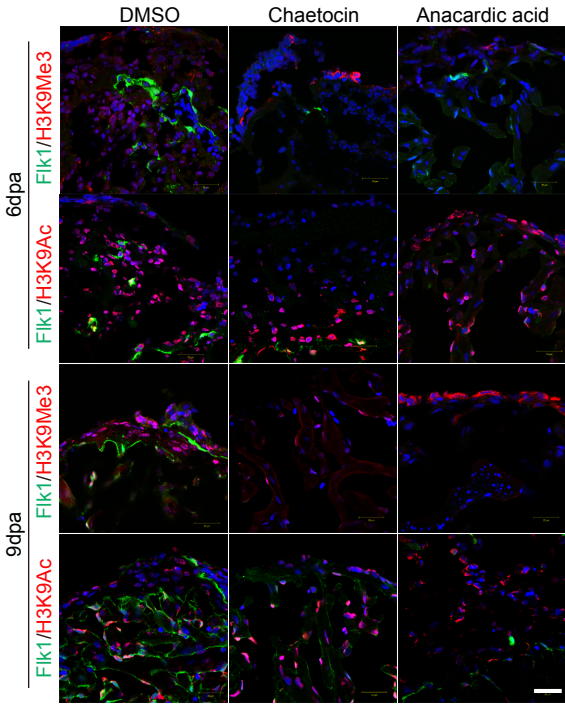

Supplement: Supplementary file 5 [file Figure S4.pdf › Figure S4.pdf]

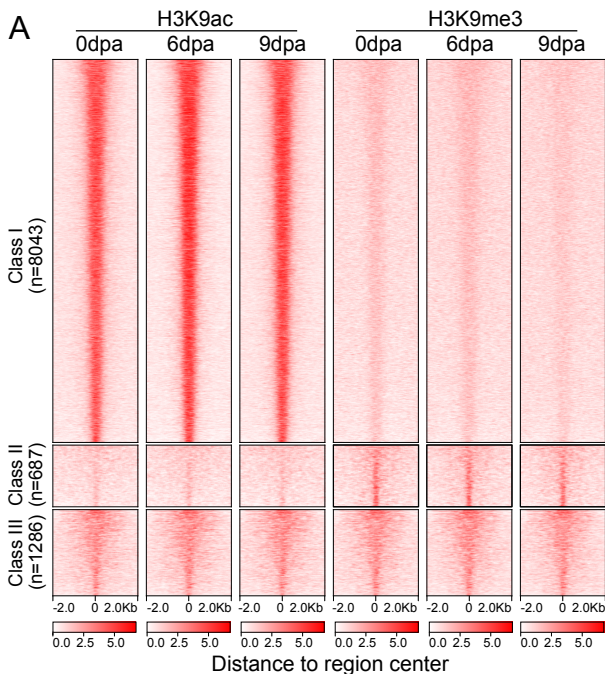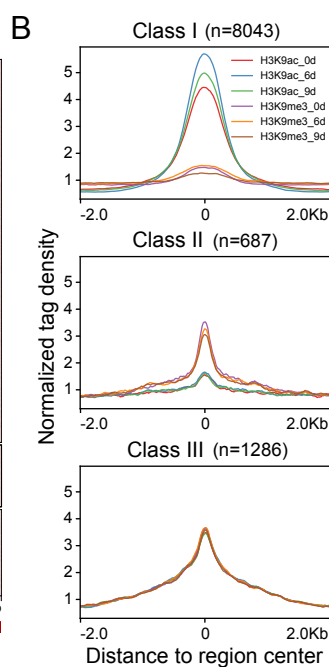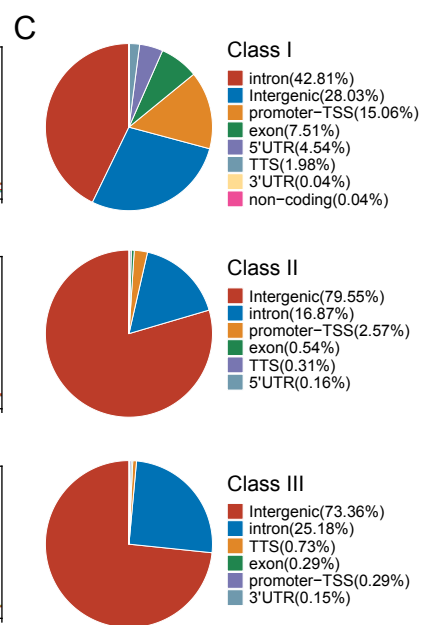

Supplement: Supplementary file 6 [file Figure S5.pdf › Figure S5.pdf]

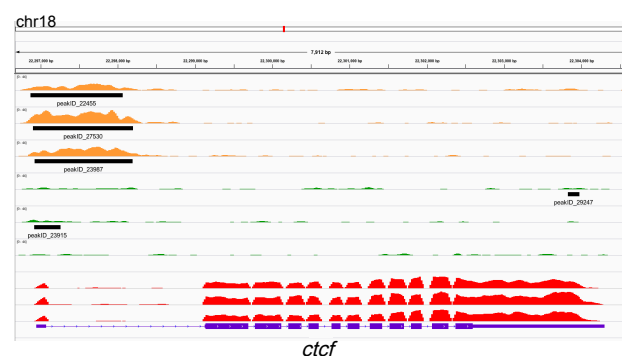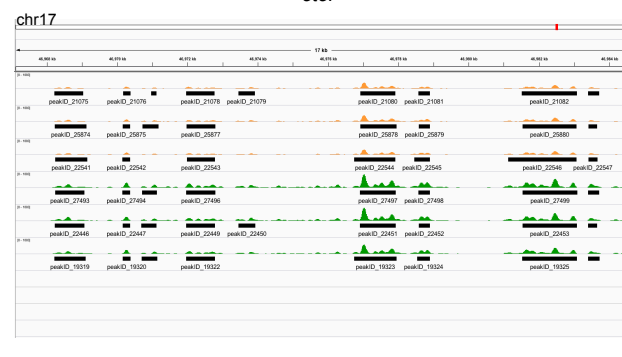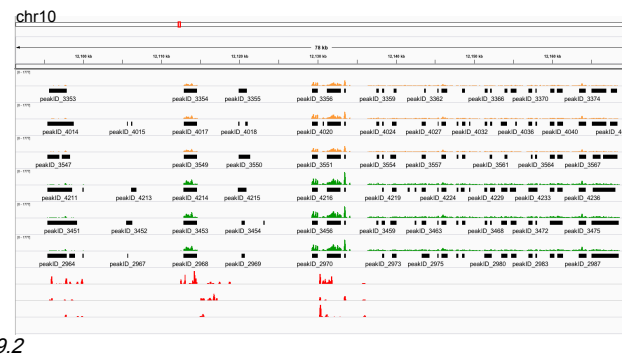

Supplement: Supplementary file 7 [file Figure S6.pdf › Figure S6.pdf]

# ChIP H3K9Me3

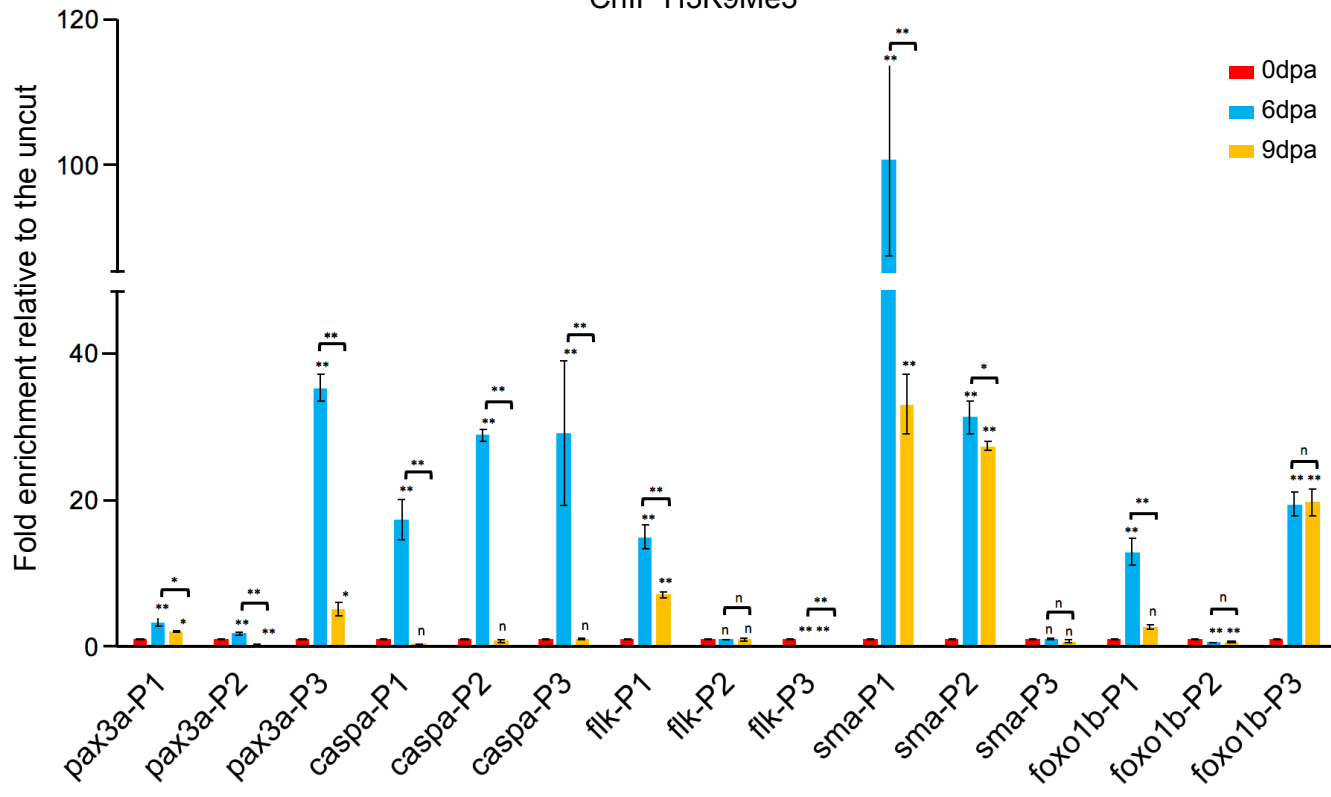

# ChIP H3K9Ac

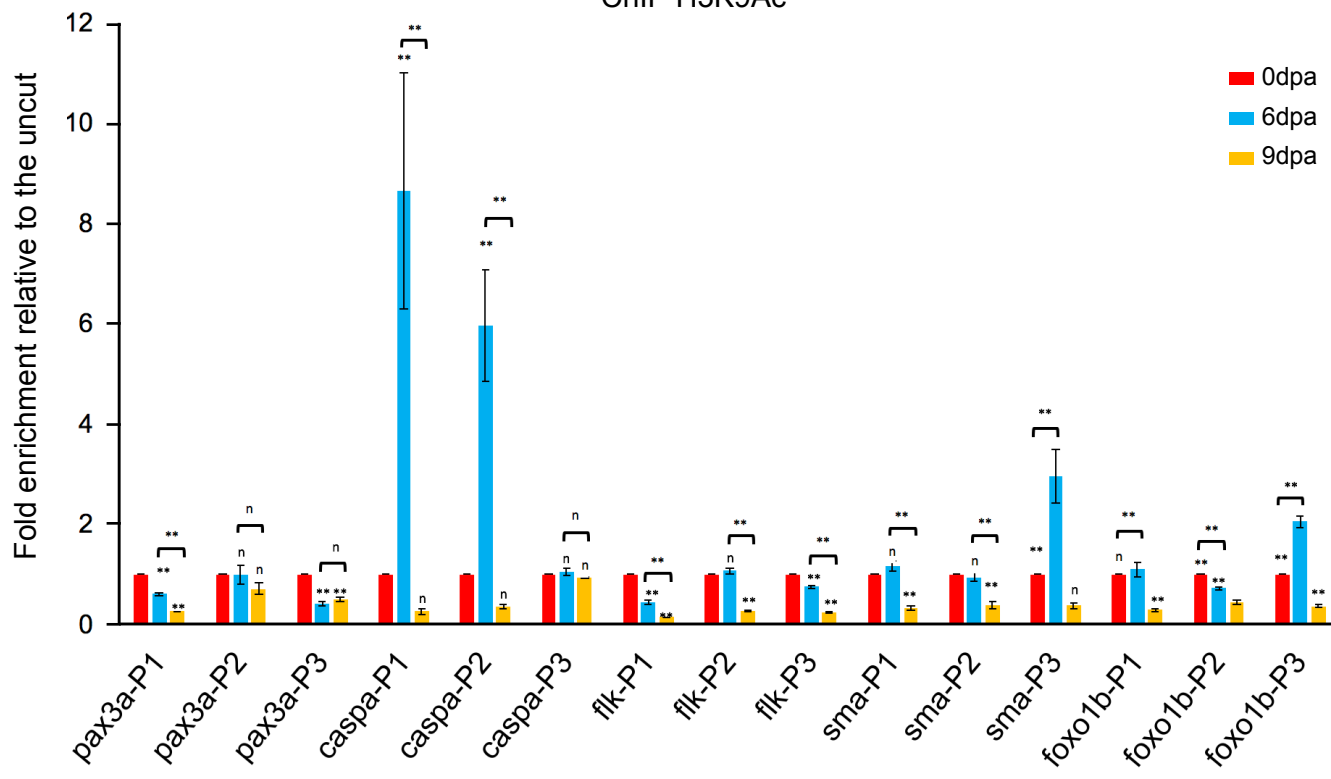

Supplement: Supplementary file 8 [file Figure S7.pdf › Figure S7.pdf]

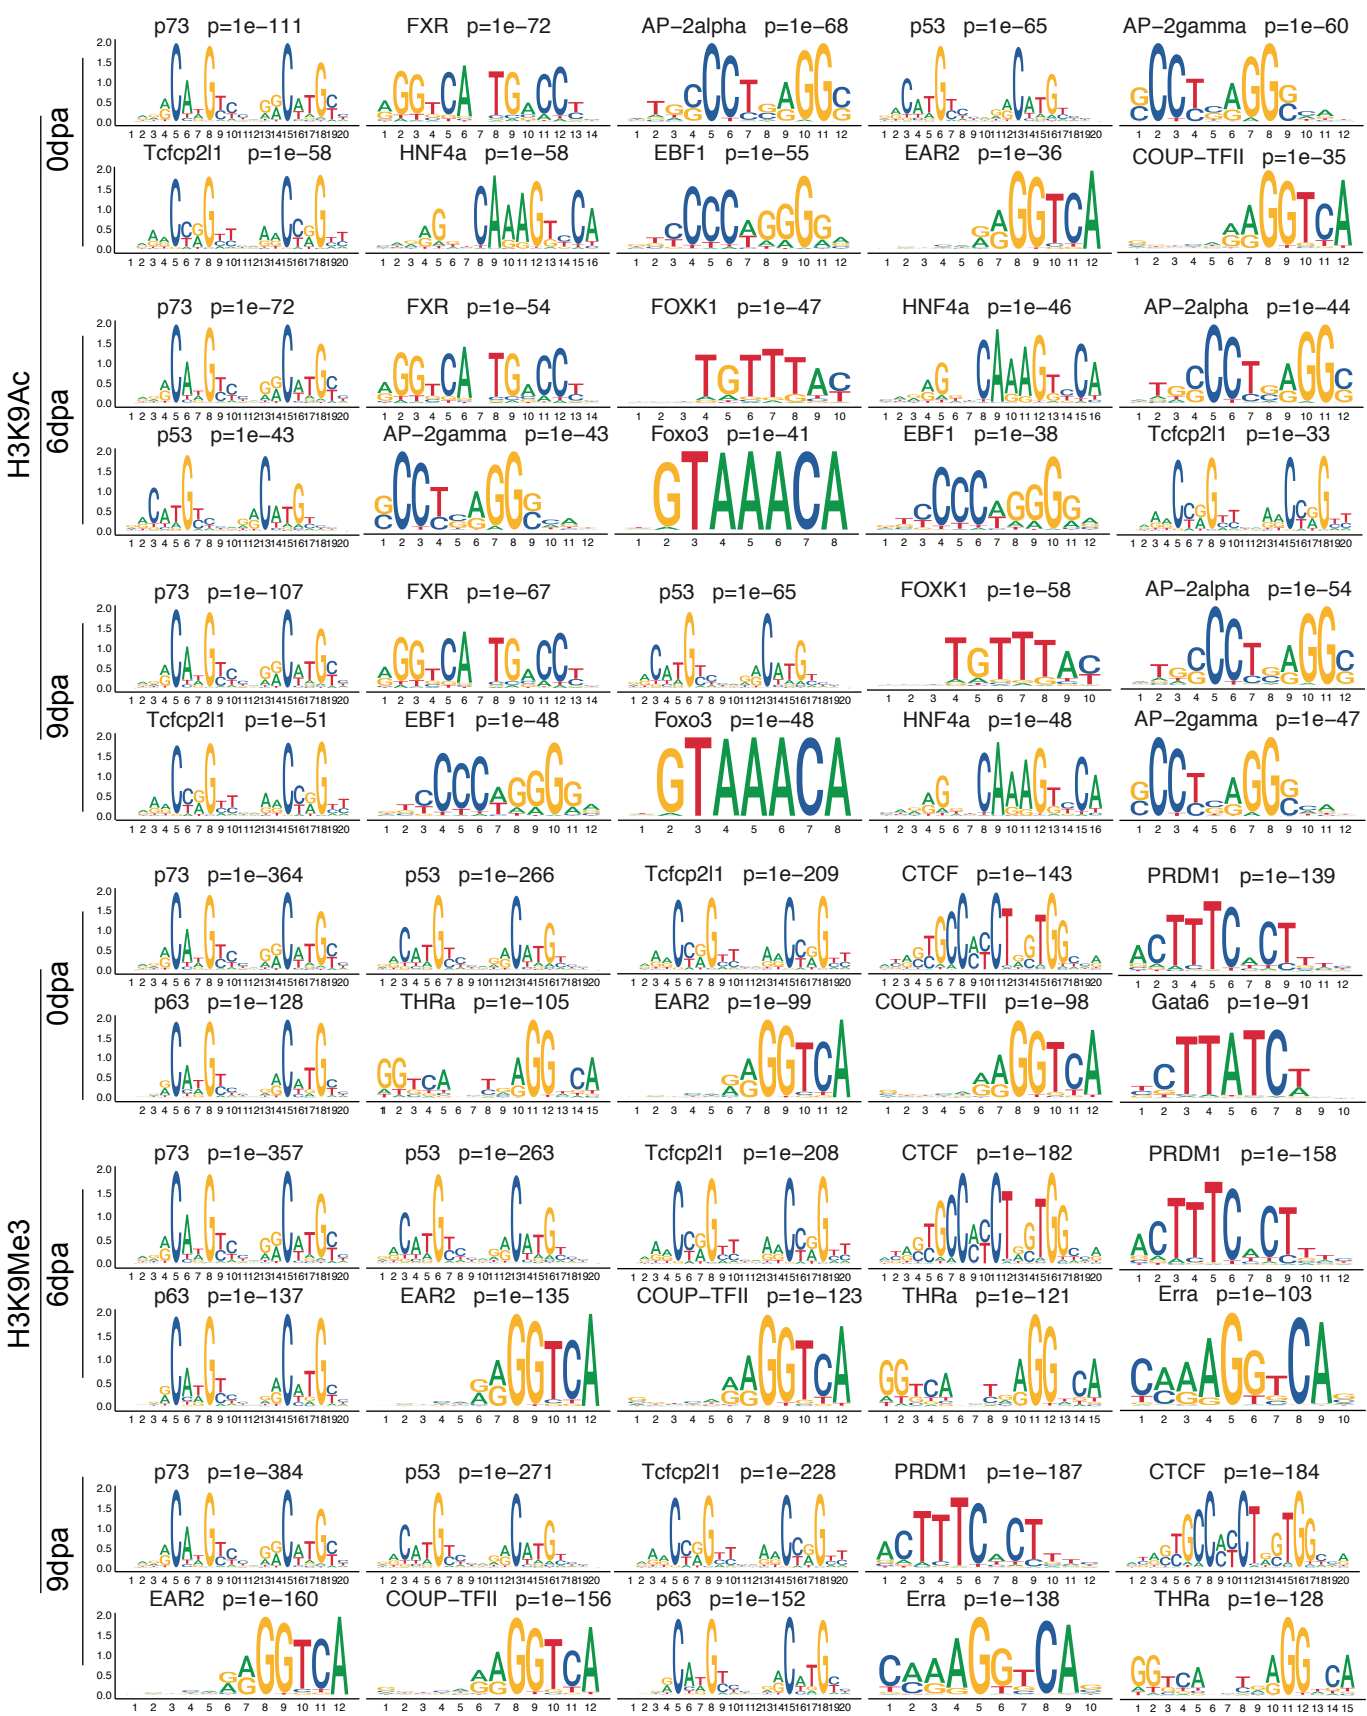

Supplement: Supplementary file 9 [file Figure S8.pdf › Figure S8.pdf]

anti-Krt5

DAPI

merged

+Krt5

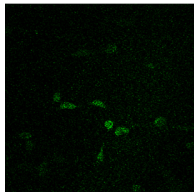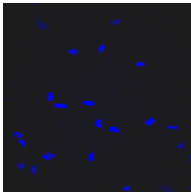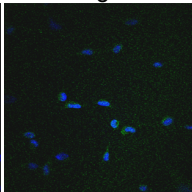

+Krt5+Nog

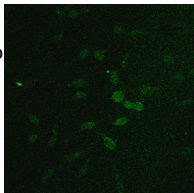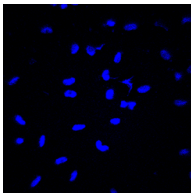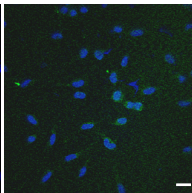

Supplement: Supplementary file 10 [file Figure S9.pdf › Figure S9.pdf]
